# Supplementary material for: CD105+ fibroblasts support an immunosuppressive niche in women at high risk of breast cancer initiation
Source: Research Square preprint supplement (doi:10.21203/rs.3.rs-5777126/v1), 2025-04-02
Supplement: Supplementary file 1 [file 630c647bbf6bee7c69d46b00.xlsx]

## Sheet: Supplementary Table 1
Supplementary Table 1. Strain metadata.
Publication name	Specimen ID	Tissue source	Age	BMI	Ethnicity	Degree of family History	Chemotherapy/Radiation therapy	Hormonal Replacement Therapy	Diagnosis	Mutation	Sequenced (passage)	Luminex (passage)	Tissue stained	Adipogenesis (passage)	Flow cytometry (passage)	Macrophage coculture	Triculture (passage)	ACTA2&CD105 passage	% CD105+	Expanded flow profiling	Growth curve (passage)	Coculture (passage)
160	160		16								3	3		5	3				44.7
240	240L	left breast	19						Hypertrophy		7	8		10	8				55.2
C078	C078SCL	subcutaneous left breast	24	26.28	White/Hispanic (Mexican)	2,3	N/N	N	bilateral prophylactic mastectomy	BRCA1	3	3	Y	5	3			3	76.3	Y
51	051L	left breast	27						Mild Periductal Mastitis		5	5		7	6				27
C145	C145SCL	subcutaneous left breast	27	22.3	White/non-Hispanic	2,3	N/N	N	bilateral prophylactic mastectomy	BRCA1	3	4	Y	5	4	Y		4	99.7	Y		4
C123	C123CL	contralateral left breast	32	32.65	White/ Hispanic (Northern European)		N/N	N	invasive ductal carcinoma right breast				Y
C051	C051CDR	contralateral to DCIS right breast	33	22.66	White/Hispanic (Mexican)	3	N/N	N	DCIS left breast		3	3	Y	5	2			3	92.9	Y
C073	C073CDR	contralateral to DCIS right breast	33	30.27	White/Hispanic (Mexican)	2	N/N	N	DCIS left breast		3	3	Y	5	2			4	56.3	Y	3
C147	C147SCL	subcutaneous left breast	33	25.97	Asian/non-Hispanic (Indian)	1,2	N/N	N	bilateral prophylactic mastectomy	BRCA1	3	3		5	3	Y	4	3	91.9	Y		4
169	169L	left breast	35								3	3		5	6			3	52.2	Y	6
C023	C023SCR	subcutaneous right breast	35	29.2	White/non-Hispanic	1,2,3	N/N	N	bilateral prophylactic mastectomy	BRCA1	4	4		6	4	Y			51.5	Y	6	6
C017	C017L	left breast	36	24.2	White/non-Hispanic (Ashkenazi Jewish)	1,2	N/N	N	Graves' disease						3				87
C063	C063CR	contralateral to tumor right breast	36	25.84	White & Black/non-Hispanic		Y/N	Unknown	infiltrating ductal carcinoma left breast	BRCA1					6				96.8
C063	C063PL	peripheral to tumor left breast	36	25.84	White & Black/non-Hispanic		Y/N	Unknown	infiltrating ductal carcinoma left breast	BRCA1			Y
C004	C004SCR	subcutaneous right breast	40	31.6	White/ Mexican		Y/N	Y	bilateral prophylactic mastectomy	BRCA1					3				79.9
C009	C009SCR	subcutaneous right breast	40	17.5	White/non-Hispanic (Caucasian/ Japanese)		N/N	Y	bilateral prophylactic mastectomy	BRCA1					3				86.4
C035	C035CR	contralateral to tumor right breast	40	23.21	Asian/ non-Hispanic ( Filipino)		N/N	N	multifocal invasive ductal carcinoma with DCIS left breast						3				79.8
C018	C018CR	contralateral to tumor right breast	41	28.6	White/Hispanic (Mexican)		Y/Y	N	inflammatory breast cancer left breast						3				71.8
C028	C028CL	contralateral to tumor left breast	41	30.6	White/Hispanic (Mexican)		Y/N	N	invasive ductal carcinoma right breast						3				82.8
30	30		49												5	Y			22.8			6
C019	C019CDR	contralateral to DCIS right breast	49	28.9	Black/non-Hispanic	2,3	N/N	N	DCIS left breast						3				83.5
C115	C115CDR	contralateral to DCIS right breast	49	28.9	White/non-Hispanic (Iranian)		N/Y	N	DCIS left breast	BRCA1					3				80.2
C002	C002SCR	subcutaneous right breast	50	25.9	White/ Ashkenazi Jew		N/N	Y	bilateral prophylactic mastectomy	BRCA1					3				94.7
C036	C036CL	contralateral to tumor left breast	51	35.29	White/non-Hispanic (Filipino)		Y/N	N	infiltrating ductal carcinoma right breast						3				87.3
C008	C008CR	contralateral to tumor right breast	53	21.5	Asian/ Chinese		Y/N	Y	invasive ductal carcinoma left breast	BRCA1			Y		3				84.8		4
C099	C099CL	contralateral to tumor left breast	55	35.98	White/non-Hispanic (Armenian)	1,2	N/N	Y	DCIS left breast and invasive ductal carcinoma right breast				Y
117	117R	right breast	56						Fibrocystic		4	4		6	4			4	72.2	Y
C103	C103CL	contralateral to tumor left breast	59	31.36	Asian/non-Hispanic (Thai)	1	N/N	Y	invasive ductal carcinoma right breast	BRCA1			Y
153	153L	left breast	60						Fibrocystic						3				94.3
C038	C038CL	contralateral to tumor left breast	60	25.2	White/non-Hispanic		Y/Y	N	infiltrating ductal carcinoma right breast				Y
112	112R	right breast	61						Mild Fibrocystic		4	4		6	3				95.7
C074	C074CL	contralateral to tumor left breast	65	22.43	White/non-Hispanic	1	N/N	N	Invasive lobular carcinoma with atypical lobular hyperplasia and lobular carcinoma in situ right breast				Y
237	237		66												4				70.3
122	122R	right breast	66						Fibrocystic		4	4		6	3				64.2
C094	C094CDL	contralateral to DCIS left breast	66	25.77	Asian/non-Hispanic (Chinese)	1,3	N/N	N	DCIS right breast		3	4		6	3			3	98.8	Y
C045	C045PDR	peripheral to DCIS right breast	70	27.22	White/non-Hispanic (American Indian- Blackfoot, Cherokee)	1	N/N	N	DCIS right breast		3	3	Y	6	3	Y		3	99.2	Y		6

## Sheet: Supplementary Table 2
Supplementary Table 2. Antibodies used for flow cytometry profiling of early passage fibroblasts and polarized macrophages.
Target	Conjugate	Clone	Company	Product #	Dilution
CD105	FITC	SN6h	Biolegend	800505	1 to 200
CD26	APC	BA5b	Biolegend	302709	1 to 200
CD13	PE	WM15	Biolegend	301703	1 to 200
CD109	APC	W7C5	Novus Bio	NBP2-75969APC	1 to 200
CD140a (PDGFRα)	PE	16A1	Biolegend	323506	1 to 50
CD140b (PDGFRB)	PE	18A2	Biolegend	323605	1 to 50
CD73	BV421	AD2	Biolegend	344007	1 to 200
CD90	PE	[5E10]	Biolegend	328109	1 to 200
CD166	PE	3A6	Biolegend	343904	1 to 200
CD201 (EPCR) (PROCR)	PE	RCR-401	Biolegend	351903	1 to 200
PDPN (Podoplanin)	PE/Cy7	NC-08	Biolegend	337013	1 to 50
CD93	APC	VIMD2	Biolegend	336119	1 to 200
CD36	PE	5-271	Biolegend	336205	1 to 200
CD45	PE	HI30	Biolegend	304007	1 to 200
CD34	BV421	561	Biolegend	343609	1 to 200
CD14	PerCP/Cy5.5	63D3	Biolegend	367110	1 to 200
CD206	PerCP/Cy5.5	15-2	Biolegend	321121	1 to 100
CD163	PE	GHI/61	Biolegend	333605	1 to 100
CD80	FITC	2D10	Biolegend	305205	1 to 100
CD45	APC	2D1	Biolegend	368512	1 to 100
CD3	FITC	UCHT1	Biolegend	300406	1 to 100
CD4	APC	SK3	Biolegend	344613	1 to 100
CD8	PE	SK1	Biolegend	344705	1 to 100
DAPI	-	-	Sigma-Aldrich	D9542	1ug/ml

## Sheet: Supplementary Table 3
Supplementary Table 3. Top 30 differentially expressed genes in CD105+ fibroblasts (CD105 signature)
NPAS1
TBX15
MEDAG
CYGB
ADAMTS15
LRRC32
ADAMTS7
FBLN2
SUSD2
TEK
MEOX2
CRLF1
CPE
CPM
KCND2
INPP4B
LAMA2
SIDT2
ADAMTS2
THBS2
SCUBE3
ARHGAP24
IGF2
ADAMTS5
NOTCH3
RORA
ENG
EGFLAM
EBF1
NMNAT2

## Sheet: Supplementary Table 4
Supplementary Table 4. Antibodies used for immunofluorescent microscopy of FFPE tissue sections and cultured fibroblasts.
Target	Isotype	Clonality	Fluorophore	Company	Product #	Dilution
α-smooth muscle actin (ACTA2)	mouse IgG2a	1A4	-	Sigma-Aldrich	A2547	1 to 500
CD105	mouse IgG1	Sn6	-	Origene	SM1177P	1 to 100
CD248	rabbit	poly	-	Sigma-Aldrich	HPA051856	1 to 100
K14	chicken	poly	-	Biolegend	906004	1 to 500
K19	mouse IgG2a	A53-B/A2	-	Biolegend	628502	1 to 500
Hoechst	-	-		Sigma-Aldrich	B2261	1 to 250
anti rabbit IgG	goat	-	AF488	Invitrogen	A11034	1 to 500
anti chicken IgY	goat	-	DyLight755	Invitrogen	SA5-10075	1 to 500
anti mouse IgG2a	goat	-	AF647	Invitrogen	A21241	1 to 500
anti mouse IgG2a	goat	-	AF488	Invitrogen	A21131	1 to 500
anti mouse IgG1	goat	-	AF568	Invitrogen	A21124	1 to 500

## Sheet: Supplementary Table 5
Supplementary Table 5. ssDNA oligo primers used for analysis of macrophage polarization.
Target_direction	Sequence 5'-3'
TNF_forward	GAGGCCAAGCCCTGGTATG
TNF_reverse	CGGGCCGATTGATCTCAGC
IL1B_forward	AGCTACGAATCTCCGACCAC
IL1B_reverse	CGTTATCCCATGTGTCGAAGAA
CXCL1_forward	GTC CGT GGC CAC TGA ACT G
CXCL1_reverse	CTG TTC AGC ATC TTT TCG ATG ATT
IL6_reverse	CCATCTTTGGAAGGTTCAGGTTG
IL6_forward	ACTCACCTCTTCAGAACGAATTG
IL10_forward	GACTTTAAGGGTTACCTGGGTTG
IL10_reverse	TCACATGCGCCTTGATGTCTG
CD206_forward	CTACAAGGGATCGGGTTTATGGA
CD206_reverse	TTGGCATTGCCTAGTAGCGTA
CD163_forward	TTTGTCAACTTGAGTCCCTTCAC
CD163_reverse	TCCCGCTACACTTGTTTTCAC
FN1_forward	AGGAAGCCGAGGTTTTAACTG
FN1_reverse	AGGACGCTCATAAGTGTCACC
CXCL12_forward	TACAGATGCCCATGCCGATTC
CXCL12_reverse	TGAAGGGCACAGTTTGGAGTG
CXCR4_forward	ACTACACCGAGGAAATGGGCT
CXCR4_reverse	CCCACAATGCCAGTTAAGAAGA
IL33_forward	TGACGGTGTTGATGGTAAGAT
IL33_reverse	AGCTCCACAGAGTGTTCCTTG
TBP_forward	GAGCTGTGATGTGAAGTTTCC
TBP_reverse	TCTGGGTTTGATCATTCTGTAG

## Sheet: res_05_LFC
ENSEMBL	baseMean	log2FoldChange	lfcSE	stat	pvalue	padj	SYMBOL	GENENAME	ENTREZID
ENSG00000154736	471.47	3.53	0.282107	12.6028	2.04e-36	3.92e-32	ADAMTS5	ADAM metallopeptidase with thrombospondin type 1 motif 5	11096
ENSG00000135903	25.81	3.48	0.329263	9.63332	5.78e-22	1.01e-18	PAX3	paired box 3	5077
ENSG00000137507	190.82	3.35	0.335897	10.7741	4.56e-27	1.76e-23	LRRC32	leucine rich repeat containing 32	2615
ENSG00000064195	20.21	3.35	0.319845	9.57176	1.05e-21	1.69e-18	DLX3	distal-less homeobox 3	1747
ENSG00000028137	82.48	3.33	0.296495	11.1747	5.42e-29	5.22e-25	TNFRSF1B	TNF receptor superfamily member 1B	7133
ENSG00000136160	77.66	3.32	0.328798	10.355	3.97e-25	9.56e-22	EDNRB	endothelin receptor type B	1910
ENSG00000164330	227.16	3.23	0.309295	10.6187	2.44e-26	7.82e-23	EBF1	EBF transcription factor 1	1879
ENSG00000227619	166.89	3.21	0.314939	10.3788	3.1e-25	8.52e-22	NA	NA	NA
ENSG00000074181	2036.76	3.14	0.294232	10.8132	2.98e-27	1.44e-23	NOTCH3	notch receptor 3	4854
ENSG00000157064	315.52	3	0.307262	9.90857	3.82e-23	8.17e-20	NMNAT2	nicotinamide nucleotide adenylyltransferase 2	23057
ENSG00000205221	65.01	2.98	0.331607	9.23641	2.55e-20	3.27e-17	VIT	vitrin	5212
ENSG00000187546	22.84	2.9	0.344199	8.29352	1.1e-16	8.47e-14	AGMO	alkylglycerol monooxygenase	392636
ENSG00000139567	78.6	2.79	0.305965	9.16323	5.04e-20	6.06e-17	ACVRL1	activin A receptor like type 1	94
ENSG00000197465	18.63	2.79	0.310281	8.68999	3.62e-18	3.49e-15	GYPE	glycophorin E (MNS blood group)	2996
ENSG00000245812	11.66	2.77	0.33482	7.66855	1.74e-14	7.79e-12	LINC02202	long intergenic non-protein coding RNA 2202	101927740
ENSG00000167244	381.59	2.75	0.345301	9.26281	1.99e-20	2.74e-17	IGF2	insulin like growth factor 2	3481
ENSG00000123560	43.66	2.72	0.345419	8.61196	7.18e-18	6.59e-15	PLP1	proteolipid protein 1	5354
ENSG00000105664	24.46	2.7	0.346515	6.06494	1.32e-09	1.14e-07	COMP	cartilage oligomeric matrix protein	1311
ENSG00000184160	28.07	2.66	0.345826	6.29056	3.16e-10	3.5e-08	ADRA2C	adrenoceptor alpha 2C	152
ENSG00000112541	69.47	2.65	0.346077	8.69349	3.51e-18	3.49e-15	PDE10A	phosphodiesterase 10A	10846
ENSG00000142347	25.61	2.62	0.270325	9.51515	1.81e-21	2.69e-18	MYO1F	myosin IF	4542
ENSG00000006016	828.82	2.59	0.342637	8.26606	1.38e-16	1.03e-13	CRLF1	cytokine receptor like factor 1	9244
ENSG00000259091	18.67	2.59	0.332614	7.70058	1.35e-14	6.52e-12	LINC00517	long intergenic non-protein coding RNA 517	400208
ENSG00000146197	3893.09	2.56	0.347422	10.8758	1.5e-27	9.65e-24	SCUBE3	signal peptide, CUB domain and EGF like domain containing 3	222663
ENSG00000091879	45.37	2.56	0.31607	8.12943	4.31e-16	2.97e-13	ANGPT2	angiopoietin 2	285
ENSG00000155792	41.47	2.55	0.288968	5.79299	6.91e-09	4.59e-07	DEPTOR	DEP domain containing MTOR interacting protein	64798
ENSG00000197142	92.6	2.49	0.315799	7.98553	1.4e-15	8.98e-13	ACSL5	acyl-CoA synthetase long chain family member 5	51703
ENSG00000126217	7.4	2.48	0.342081	6.80935	9.8e-12	1.97e-09	MCF2L	MCF.2 cell line derived transforming sequence like	23263
ENSG00000198771	7.12	2.46	0.34377	6.90997	4.85e-12	1.06e-09	RCSD1	RCSD domain containing 1	92241
ENSG00000164318	144.6	2.45	0.336757	7.60553	2.84e-14	1.24e-11	EGFLAM	EGF like, fibronectin type III and laminin G domains	133584
ENSG00000102802	1663.66	2.44	0.325428	7.67966	1.6e-14	7.49e-12	MEDAG	mesenteric estrogen dependent adipogenesis	84935
ENSG00000120156	172.4	2.44	0.346226	7.95549	1.78e-15	1.07e-12	TEK	TEK receptor tyrosine kinase	7010
ENSG00000187288	16.54	2.44	0.330713	7.29977	2.88e-13	9.74e-11	CIDEC	cell death inducing DFFA like effector c	63924
ENSG00000142621	45.49	2.43	0.33158	7.48228	7.3e-14	2.81e-11	FHAD1	forkhead associated phosphopeptide binding domain 1	114827
ENSG00000106991	4101.89	2.41	0.344612	7.70617	1.3e-14	6.4e-12	ENG	endoglin	2022
ENSG00000138792	43.8	2.41	0.31174	7.76293	8.3e-15	4.32e-12	ENPEP	glutamyl aminopeptidase	2028
ENSG00000158008	7.59	2.41	0.339589	6.59699	4.2e-11	6.62e-09	EXTL1	exostosin like glycosyltransferase 1	2134
ENSG00000166106	250.64	2.4	0.316701	7.67604	1.64e-14	7.52e-12	ADAMTS15	ADAM metallopeptidase with thrombospondin type 1 motif 15	170689
ENSG00000162687	20.27	2.4	0.334396	4.33543	1.45e-05	0.000222657	KCNT2	potassium sodium-activated channel subfamily T member 2	343450
ENSG00000130751	115.35	2.39	0.29278	8.18988	2.61e-16	1.86e-13	NPAS1	neuronal PAS domain protein 1	4861
ENSG00000180537	29.19	2.37	0.331788	7.22261	5.1e-13	1.58e-10	RNF182	ring finger protein 182	221687
ENSG00000139364	44.28	2.36	0.323323	7.36129	1.82e-13	6.7e-11	TMEM132B	transmembrane protein 132B	114795
ENSG00000099994	563.4	2.35	0.324454	7.41426	1.22e-13	4.62e-11	SUSD2	sushi domain containing 2	56241
ENSG00000163520	618.23	2.34	0.299601	7.86124	3.8e-15	2.15e-12	FBLN2	fibulin 2	2199
ENSG00000134830	38.41	2.34	0.345245	7.27992	3.34e-13	1.11e-10	C5AR2	complement C5a receptor 2	27202
ENSG00000115155	7.02	2.33	0.337466	6.45514	1.08e-10	1.38e-08	OTOF	otoferlin	9381
ENSG00000176928	10.58	2.32	0.325407	6.91438	4.7e-12	1.04e-09	GCNT4	glucosaminyl (N-acetyl) transferase 4	51301
ENSG00000146122	147.44	2.3	0.34247	7.14618	8.92e-13	2.53e-10	DAAM2	dishevelled associated activator of morphogenesis 2	23500
ENSG00000246430	126.79	2.29	0.344376	7.15344	8.46e-13	2.43e-10	LINC00968	long intergenic non-protein coding RNA 968	100507632
ENSG00000106511	126.15	2.29	0.347232	8.45519	2.79e-17	2.44e-14	MEOX2	mesenchyme homeobox 2	4223
ENSG00000170891	10.78	2.27	0.34342	3.65637	0.000255811	0.00201898	CYTL1	cytokine like 1	54360
ENSG00000157150	83.34	2.26	0.2981	7.5941	3.1e-14	1.33e-11	TIMP4	TIMP metallopeptidase inhibitor 4	7079
ENSG00000123453	49.88	2.26	0.343864	6.95863	3.44e-12	8.37e-10	SARDH	sarcosine dehydrogenase	1757
ENSG00000185112	234.94	2.25	0.331759	6.98044	2.94e-12	7.45e-10	FAM43A	family with sequence similarity 43 member A	131583
ENSG00000137033	889.24	2.24	0.338395	6.92978	4.21e-12	9.66e-10	IL33	interleukin 33	90865
ENSG00000221818	494.8	2.24	0.336745	6.92073	4.49e-12	1.01e-09	EBF2	EBF transcription factor 2	64641
ENSG00000162551	59.99	2.23	0.347464	7.51115	5.86e-14	2.35e-11	ALPL	alkaline phosphatase, biomineralization associated	249
ENSG00000224413	6.95	2.23	0.342566	6.18024	6.4e-10	6.22e-08	NA	NA	NA
ENSG00000161544	317.5	2.22	0.295009	7.57105	3.7e-14	1.55e-11	CYGB	cytoglobin	114757
ENSG00000047936	220.5	2.22	0.310419	7.23587	4.63e-13	1.46e-10	ROS1	ROS proto-oncogene 1, receptor tyrosine kinase	6098
ENSG00000164683	20.76	2.21	0.300892	7.2694	3.61e-13	1.18e-10	HEY1	hes related family bHLH transcription factor with YRPW motif 1	23462
ENSG00000127083	10.91	2.21	0.340168	4.44893	8.63e-06	0.000148492	OMD	osteomodulin	4958
ENSG00000176907	5.43	2.21	0.344473	6.09149	1.12e-09	1e-07	TCIM	transcriptional and immune response regulator	56892
ENSG00000069667	397.03	2.2	0.227633	9.65142	4.85e-22	9.33e-19	RORA	RAR related orphan receptor A	6095
ENSG00000099864	12.56	2.2	0.333368	4.12194	3.76e-05	0.000462507	PALM	paralemmin	5064
ENSG00000091129	704.92	2.19	0.309855	7.1557	8.32e-13	2.43e-10	NRCAM	neuronal cell adhesion molecule	4897
ENSG00000049540	133.77	2.18	0.347455	4.95521	7.23e-07	2.11e-05	ELN	elastin	2006
ENSG00000111335	88.32	2.18	0.320146	6.89482	5.39e-12	1.17e-09	OAS2	2'-5'-oligoadenylate synthetase 2	4939
ENSG00000173641	44.17	2.18	0.319233	4.10919	3.97e-05	0.000484767	HSPB7	heat shock protein family B (small) member 7	27129
ENSG00000108950	23.49	2.17	0.34491	6.57258	4.95e-11	7.5e-09	FAM20A	FAM20A golgi associated secretory pathway pseudokinase	54757
ENSG00000249378	21.34	2.16	0.341485	6.50905	7.56e-11	1.07e-08	LINC01060	long intergenic non-protein coding RNA 1060	401164
ENSG00000137809	637.38	2.15	0.347351	7.06131	1.65e-12	4.29e-10	ITGA11	integrin subunit alpha 11	22801
ENSG00000189058	247.79	2.15	0.335226	6.61046	3.83e-11	6.2e-09	APOD	apolipoprotein D	347
ENSG00000130600	87.29	2.15	0.347202	6.93004	4.21e-12	9.66e-10	H19	H19 imprinted maternally expressed transcript	283120
ENSG00000163909	22.84	2.15	0.347325	7.00566	2.46e-12	6.31e-10	HEYL	hes related family bHLH transcription factor with YRPW motif like	26508
ENSG00000197852	209.27	2.14	0.317739	6.82331	8.9e-12	1.84e-09	INKA2	inka box actin regulator 2	55924
ENSG00000176435	67.51	2.14	0.301331	7.12129	1.07e-12	2.9e-10	CLEC14A	C-type lectin domain containing 14A	161198
ENSG00000169067	5.54	2.14	0.338869	5.9171	3.28e-09	2.46e-07	ACTBL2	actin beta like 2	345651
ENSG00000162511	60.49	2.13	0.326589	6.61436	3.73e-11	6.09e-09	LAPTM5	lysosomal protein transmembrane 5	7805
ENSG00000100302	14.33	2.13	0.33667	6.3258	2.52e-10	2.9e-08	RASD2	RASD family member 2	23551
ENSG00000153162	241.05	2.12	0.346689	6.75852	1.39e-11	2.63e-09	BMP6	bone morphogenetic protein 6	654
ENSG00000136869	532	2.09	0.325601	6.52028	7.02e-11	1.01e-08	TLR4	toll like receptor 4	7099
ENSG00000178445	61.41	2.09	0.250844	8.31047	9.53e-17	7.65e-14	GLDC	glycine decarboxylase	2731
ENSG00000129467	16.05	2.09	0.347463	6.4909	8.53e-11	1.13e-08	ADCY4	adenylate cyclase 4	196883
ENSG00000160191	15.9	2.08	0.345481	6.23219	4.6e-10	4.79e-08	PDE9A	phosphodiesterase 9A	5152
ENSG00000160838	6.09	2.08	0.347458	6.26053	3.84e-10	4.1e-08	LRRC71	leucine rich repeat containing 71	149499
ENSG00000109472	365.87	2.07	0.282963	7.35722	1.88e-13	6.7e-11	CPE	carboxypeptidase E	1363
ENSG00000122176	132.77	2.07	0.34394	6.36115	2e-10	2.35e-08	FMOD	fibromodulin	2331
ENSG00000101938	51.7	2.07	0.342014	6.30459	2.89e-10	3.23e-08	CHRDL1	chordin like 1	91851
ENSG00000135218	25.56	2.07	0.346916	6.41627	1.4e-10	1.73e-08	CD36	CD36 molecule	948
ENSG00000151025	6.09	2.07	0.347006	5.91389	3.34e-09	2.49e-07	GPR158	G protein-coupled receptor 158	57512
ENSG00000176532	69.68	2.05	0.334566	6.28317	3.32e-10	3.65e-08	PRR15	proline rich 15	222171
ENSG00000073756	176.41	2.04	0.261644	4.15279	3.28e-05	0.000418225	PTGS2	prostaglandin-endoperoxide synthase 2	5743
ENSG00000108551	170.52	2.04	0.299552	6.84555	7.62e-12	1.61e-09	RASD1	ras related dexamethasone induced 1	51655
ENSG00000172572	450.52	2.03	0.328133	6.31046	2.78e-10	3.15e-08	PDE3A	phosphodiesterase 3A	5139
ENSG00000136378	258.77	2.03	0.271658	7.50117	6.33e-14	2.49e-11	ADAMTS7	ADAM metallopeptidase with thrombospondin type 1 motif 7	11173
ENSG00000111348	196.31	2.03	0.299621	6.80889	9.84e-12	1.97e-09	ARHGDIB	Rho GDP dissociation inhibitor beta	397
ENSG00000102935	51.03	2.03	0.337557	6.16593	7.01e-10	6.75e-08	ZNF423	zinc finger protein 423	23090
ENSG00000164056	46.43	2.03	0.245718	5.67968	1.35e-08	7.93e-07	SPRY1	sprouty RTK signaling antagonist 1	10252
ENSG00000133116	5.87	2.03	0.345744	5.65208	1.59e-08	9.03e-07	KL	klotho	9365
ENSG00000172348	102.68	2.02	0.283173	7.13528	9.66e-13	2.7e-10	RCAN2	regulator of calcineurin 2	10231
ENSG00000144668	73.43	2.02	0.346443	7.20245	5.91e-13	1.78e-10	ITGA9	integrin subunit alpha 9	3680
ENSG00000108691	235	2.01	0.329837	6.22438	4.83e-10	5e-08	CCL2	C-C motif chemokine ligand 2	6347
ENSG00000227706	50.9	2.01	0.339997	6.11089	9.91e-10	9.04e-08	NA	NA	NA
ENSG00000150556	13.81	2.01	0.344957	5.97074	2.36e-09	1.83e-07	LYPD6B	LY6/PLAUR domain containing 6B	130576
ENSG00000233895	8.57	2.01	0.334624	5.90813	3.46e-09	2.57e-07	NA	NA	NA
ENSG00000074527	668.18	2	0.33757	6.12615	9e-10	8.43e-08	NTN4	netrin 4	59277
ENSG00000154556	150	2	0.346892	6.93872	3.96e-12	9.29e-10	SORBS2	sorbin and SH3 domain containing 2	8470
ENSG00000144407	6.08	2	0.347355	6.11239	9.82e-10	9e-08	PTH2R	parathyroid hormone 2 receptor	5746
ENSG00000223813	13.25	1.99	0.346232	5.9551	2.6e-09	2e-07	NA	NA	NA
ENSG00000223812	3.88	1.99	0.34677	6.151	7.7e-10	7.38e-08	NA	NA	NA
ENSG00000151067	180.82	1.98	0.273491	7.26354	3.77e-13	1.21e-10	CACNA1C	calcium voltage-gated channel subunit alpha1 C	775
ENSG00000257335	155.34	1.98	0.344317	6.05551	1.4e-09	1.17e-07	MGAM	maltase-glucoamylase	8972
ENSG00000103888	1936.67	1.96	0.342502	5.99393	2.05e-09	1.6e-07	CEMIP	cell migration inducing hyaluronidase 1	57214
ENSG00000187800	438.16	1.96	0.311125	6.3392	2.31e-10	2.68e-08	PEAR1	platelet endothelial aggregation receptor 1	375033
ENSG00000175155	163.88	1.96	0.272442	7.19893	6.07e-13	1.8e-10	YPEL2	yippee like 2	388403
ENSG00000108622	8.73	1.96	0.340487	5.70216	1.18e-08	7.19e-07	ICAM2	intercellular adhesion molecule 2	3384
ENSG00000110076	18.97	1.95	0.346999	5.94984	2.68e-09	2.06e-07	NRXN2	neurexin 2	9379
ENSG00000163599	8.09	1.95	0.346859	6.12207	9.24e-10	8.59e-08	CTLA4	cytotoxic T-lymphocyte associated protein 4	1493
ENSG00000115602	870.83	1.94	0.319548	6.13589	8.47e-10	7.99e-08	IL1RL1	interleukin 1 receptor like 1	9173
ENSG00000180875	164.66	1.94	0.301717	6.45936	1.05e-10	1.35e-08	GREM2	gremlin 2, DAN family BMP antagonist	64388
ENSG00000184347	124.38	1.94	0.292908	3.56704	0.000361029	0.00263305	SLIT3	slit guidance ligand 3	6586
ENSG00000128918	52.95	1.94	0.346912	6.54502	5.95e-11	8.88e-09	ALDH1A2	aldehyde dehydrogenase 1 family member A2	8854
ENSG00000138378	37.97	1.94	0.285991	6.78207	1.18e-11	2.28e-09	STAT4	signal transducer and activator of transcription 4	6775
ENSG00000156486	31.24	1.94	0.333259	5.92711	3.08e-09	2.34e-07	KCNS2	potassium voltage-gated channel modifier subfamily S member 2	3788
ENSG00000171049	6.9	1.94	0.331467	5.70999	1.13e-08	6.91e-07	FPR2	formyl peptide receptor 2	2358
ENSG00000154258	72.87	1.93	0.326555	5.99838	1.99e-09	1.57e-07	ABCA9	ATP binding cassette subfamily A member 9	10350
ENSG00000133107	42.31	1.93	0.347102	5.99803	2e-09	1.57e-07	TRPC4	transient receptor potential cation channel subfamily C member 4	7223
ENSG00000135678	1989.11	1.92	0.211739	9.0597	1.31e-19	1.48e-16	CPM	carboxypeptidase M	1368
ENSG00000106688	735.98	1.92	0.285999	6.74851	1.49e-11	2.79e-09	SLC1A1	solute carrier family 1 member 1	6505
ENSG00000244242	37.1	1.92	0.28691	6.67308	2.5e-11	4.23e-09	IFITM10	interferon induced transmembrane protein 10	402778
ENSG00000163395	16.05	1.92	0.339776	5.74343	9.28e-09	5.84e-07	IGFN1	immunoglobulin like and fibronectin type III domain containing 1	91156
ENSG00000186340	7540.77	1.91	0.243423	7.8465	4.28e-15	2.35e-12	THBS2	thrombospondin 2	7058
ENSG00000261425	24.58	1.91	0.347365	6.10863	1e-09	9.13e-08	NA	NA	NA
ENSG00000226012	1.95	1.91	0.346752	5.52603	3.28e-08	1.63e-06	NA	NA	NA
ENSG00000149131	534.11	1.9	0.29301	6.50546	7.75e-11	1.08e-08	SERPING1	serpin family G member 1	710
ENSG00000116690	339.12	1.9	0.345908	6.79038	1.12e-11	2.2e-09	PRG4	proteoglycan 4	10216
ENSG00000115457	115.05	1.9	0.345351	5.81251	6.15e-09	4.23e-07	IGFBP2	insulin like growth factor binding protein 2	3485
ENSG00000138669	69.1	1.9	0.307438	6.21868	5.01e-10	5.08e-08	PRKG2	protein kinase cGMP-dependent 2	5593
ENSG00000105639	28.57	1.89	0.305569	6.19008	6.01e-10	5.88e-08	JAK3	Janus kinase 3	3718
ENSG00000140459	14.07	1.89	0.309915	6.04599	1.48e-09	1.22e-07	CYP11A1	cytochrome P450 family 11 subfamily A member 1	1583
ENSG00000182463	43.82	1.88	0.342136	5.67414	1.39e-08	8.08e-07	TSHZ2	teashirt zinc finger homeobox 2	128553
ENSG00000197653	21.8	1.88	0.266116	6.23285	4.58e-10	4.79e-08	DNAH10	dynein axonemal heavy chain 10	196385
ENSG00000118432	1090.56	1.87	0.33544	5.70115	1.19e-08	7.21e-07	CNR1	cannabinoid receptor 1	1268
ENSG00000162618	803.13	1.87	0.307245	6.13829	8.34e-10	7.91e-08	ADGRL4	adhesion G protein-coupled receptor L4	64123
ENSG00000065054	382.17	1.87	0.259652	7.20619	5.75e-13	1.76e-10	SLC9A3R2	SLC9A3 regulator 2	9351
ENSG00000236453	120.1	1.87	0.301975	6.21087	5.27e-10	5.2e-08	NA	NA	NA
ENSG00000183044	69.7	1.87	0.280695	6.67477	2.48e-11	4.22e-09	ABAT	4-aminobutyrate aminotransferase	18
ENSG00000257181	11.31	1.87	0.306457	6.00221	1.95e-09	1.54e-07	NA	NA	NA
ENSG00000147257	5.32	1.87	0.344865	4.82982	1.37e-06	3.5e-05	GPC3	glypican 3	2719
ENSG00000000971	1505.15	1.86	0.283611	6.58638	4.51e-11	7e-09	CFH	complement factor H	3075
ENSG00000178033	323.89	1.86	0.261278	7.12815	1.02e-12	2.8e-10	CALHM5	calcium homeostasis modulator family member 5	254228
ENSG00000261189	9.82	1.86	0.346643	5.50678	3.65e-08	1.79e-06	NA	NA	NA
ENSG00000109511	98.47	1.85	0.288111	6.44293	1.17e-10	1.48e-08	ANXA10	annexin A10	11199
ENSG00000099822	36.73	1.85	0.284755	6.4969	8.2e-11	1.1e-08	HCN2	hyperpolarization activated cyclic nucleotide gated potassium and sodium channel 2	610
ENSG00000145536	20.63	1.85	0.334394	5.58163	2.38e-08	1.25e-06	ADAMTS16	ADAM metallopeptidase with thrombospondin type 1 motif 16	170690
ENSG00000131668	2.3	1.85	0.343023	3.65392	0.000258272	0.00203302	BARX1	BARX homeobox 1	56033
ENSG00000117114	1126	1.84	0.274631	6.69872	2.1e-11	3.71e-09	ADGRL2	adhesion G protein-coupled receptor L2	23266
ENSG00000214140	12.33	1.84	0.325673	5.61146	2.01e-08	1.09e-06	PRCD	photoreceptor disc component	768206
ENSG00000188488	6.5	1.84	0.344547	5.28827	1.23e-07	4.96e-06	SERPINA5	serpin family A member 5	5104
ENSG00000174807	3393.7	1.83	0.249273	7.33301	2.25e-13	7.88e-11	CD248	CD248 molecule	57124
ENSG00000108001	231.11	1.83	0.339887	5.56805	2.58e-08	1.33e-06	EBF3	EBF transcription factor 3	253738
ENSG00000240694	81.42	1.83	0.336149	5.56022	2.69e-08	1.39e-06	PNMA2	PNMA family member 2	10687
ENSG00000162643	46.44	1.83	0.300816	6.07738	1.22e-09	1.08e-07	DNAI3	dynein axonemal intermediate chain 3	126820
ENSG00000160886	710.85	1.82	0.262917	6.92547	4.35e-12	9.84e-10	LY6K	lymphocyte antigen 6 family member K	54742
ENSG00000152463	475.2	1.82	0.337427	5.55139	2.83e-08	1.45e-06	OLAH	oleoyl-ACP hydrolase	55301
ENSG00000111859	324.28	1.82	0.331266	5.60421	2.09e-08	1.12e-06	NEDD9	neural precursor cell expressed, developmentally down-regulated 9	4739
ENSG00000269936	61.1	1.82	0.315291	5.81198	6.17e-09	4.23e-07	NA	NA	NA
ENSG00000224383	3.21	1.82	0.34662	5.55824	2.73e-08	1.4e-06	PRR29	proline rich 29	92340
ENSG00000081818	1.17	1.82	0.34701	3.75951	0.000170246	0.00147988	PCDHB4	protocadherin beta 4	56131
ENSG00000092607	398.42	1.81	0.23178	7.7998	6.2e-15	3.32e-12	TBX15	T-box transcription factor 15	6913
ENSG00000163687	15.32	1.81	0.343691	6.21913	5e-10	5.08e-08	DNASE1L3	deoxyribonuclease 1 like 3	1776
ENSG00000242908	4.19	1.81	0.347357	5.19856	2.01e-07	7.42e-06	NA	NA	NA
ENSG00000272321	3.33	1.81	0.347213	5.44465	5.19e-08	2.41e-06	NA	NA	NA
ENSG00000143452	2.76	1.81	0.34387	4.95809	7.12e-07	2.09e-05	HORMAD1	HORMA domain containing 1	84072
ENSG00000130592	102.35	1.8	0.347008	5.56344	2.65e-08	1.37e-06	LSP1	lymphocyte specific protein 1	4046
ENSG00000260977	14.75	1.8	0.303468	5.87033	4.35e-09	3.15e-07	NA	NA	NA
ENSG00000175899	6.7	1.8	0.341069	5.55115	2.84e-08	1.45e-06	A2M	alpha-2-macroglobulin	2
ENSG00000176659	5.76	1.8	0.345116	5.86406	4.52e-09	3.25e-07	LINC02910	long intergenic non-protein coding RNA 2910	284756
ENSG00000151150	69.08	1.79	0.321631	5.60058	2.14e-08	1.14e-06	ANK3	ankyrin 3	288
ENSG00000174343	40.08	1.79	0.339191	5.40121	6.62e-08	2.97e-06	CHRNA9	cholinergic receptor nicotinic alpha 9 subunit	55584
ENSG00000184185	12.67	1.79	0.336335	5.3391	9.34e-08	3.91e-06	KCNJ12	potassium inwardly rectifying channel subfamily J member 12	3768
ENSG00000105509	854.38	1.78	0.346532	5.47058	4.49e-08	2.15e-06	HAS1	hyaluronan synthase 1	3036
ENSG00000137868	53.49	1.78	0.345566	5.40658	6.42e-08	2.89e-06	STRA6	signaling receptor and transporter of retinol STRA6	64220
ENSG00000227811	12.82	1.78	0.341015	5.27739	1.31e-07	5.17e-06	INKA2-AS1	INKA2 antisense RNA 1	100506343
ENSG00000133488	6.17	1.78	0.346328	5.1159	3.12e-07	1.06e-05	SEC14L4	SEC14 like lipid binding 4	284904
ENSG00000182752	4157.6	1.77	0.283675	6.26059	3.84e-10	4.1e-08	PAPPA	pappalysin 1	5069
ENSG00000163491	39.15	1.77	0.233505	7.54432	4.55e-14	1.86e-11	NEK10	NIMA related kinase 10	152110
ENSG00000144152	29.84	1.77	0.278022	6.35926	2.03e-10	2.37e-08	FBLN7	fibulin 7	129804
ENSG00000196569	2780.66	1.75	0.208549	8.41023	4.09e-17	3.43e-14	LAMA2	laminin subunit alpha 2	3908
ENSG00000204103	94.99	1.75	0.250225	6.97713	3.01e-12	7.53e-10	MAFB	MAF bZIP transcription factor B	9935
ENSG00000072952	72.79	1.75	0.339378	5.28881	1.23e-07	4.96e-06	IRAG1	inositol 1,4,5-triphosphate receptor associated 1	10335
ENSG00000260604	53.84	1.75	0.325868	5.43232	5.56e-08	2.55e-06	NA	NA	NA
ENSG00000248698	33.23	1.75	0.342655	5.27262	1.34e-07	5.22e-06	LINC01085	long intergenic non-protein coding RNA 1085	152742
ENSG00000176771	27.61	1.75	0.347381	5.37954	7.47e-08	3.22e-06	NCKAP5	NCK associated protein 5	344148
ENSG00000105696	24.8	1.75	0.328665	5.35118	8.74e-08	3.69e-06	TMEM59L	transmembrane protein 59 like	25789
ENSG00000147488	6.43	1.75	0.298758	5.68723	1.29e-08	7.67e-07	ST18	ST18 C2H2C-type zinc finger transcription factor	9705
ENSG00000048540	53.73	1.74	0.347455	5.46939	4.52e-08	2.16e-06	LMO3	LIM domain only 3	55885
ENSG00000113555	9.2	1.74	0.319868	5.38419	7.28e-08	3.16e-06	PCDH12	protocadherin 12	51294
ENSG00000100600	1079.38	1.73	0.261713	6.602	4.06e-11	6.45e-09	LGMN	legumain	5641
ENSG00000077092	147.79	1.73	0.286086	6.07731	1.22e-09	1.08e-07	RARB	retinoic acid receptor beta	5915
ENSG00000119630	52	1.73	0.255936	6.73589	1.63e-11	2.98e-09	PGF	placental growth factor	5228
ENSG00000160013	38.95	1.73	0.322271	5.42055	5.94e-08	2.7e-06	PTGIR	prostaglandin I2 receptor	5739
ENSG00000108688	10.97	1.73	0.346047	5.11991	3.06e-07	1.04e-05	CCL7	C-C motif chemokine ligand 7	6354
ENSG00000272841	281.65	1.72	0.261397	6.57656	4.81e-11	7.36e-09	NA	NA	NA
ENSG00000125675	78.52	1.72	0.326686	5.31669	1.06e-07	4.36e-06	GRIA3	glutamate ionotropic receptor AMPA type subunit 3	2892
ENSG00000179593	43.14	1.72	0.29121	5.90087	3.62e-09	2.66e-07	ALOX15B	arachidonate 15-lipoxygenase type B	247
ENSG00000109272	29.02	1.72	0.308611	5.5899	2.27e-08	1.2e-06	PF4V1	platelet factor 4 variant 1	5197
ENSG00000109339	8.5	1.72	0.328404	5.17318	2.3e-07	8.41e-06	MAPK10	mitogen-activated protein kinase 10	5602
ENSG00000115468	4.84	1.72	0.334792	3.59762	0.000321136	0.00240683	EFHD1	EF-hand domain family member D1	80303
ENSG00000087116	3550.22	1.71	0.211511	8.0728	6.87e-16	4.56e-13	ADAMTS2	ADAM metallopeptidase with thrombospondin type 1 motif 2	9509
ENSG00000184408	178.1	1.71	0.232979	7.35768	1.87e-13	6.7e-11	KCND2	potassium voltage-gated channel subfamily D member 2	3751
ENSG00000231453	2.53	1.71	0.342397	5.34042	9.27e-08	3.89e-06	LINC01305	long intergenic non-protein coding RNA 1305	285084
ENSG00000146674	962.49	1.7	0.341556	3.32329	0.000889631	0.00524303	IGFBP3	insulin like growth factor binding protein 3	3486
ENSG00000112964	146.33	1.7	0.2733	6.21312	5.19e-10	5.18e-08	GHR	growth hormone receptor	2690
ENSG00000172575	8.33	1.7	0.34481	5.42252	5.88e-08	2.67e-06	RASGRP1	RAS guanyl releasing protein 1	10125
ENSG00000109846	380.9	1.69	0.329481	5.20806	1.91e-07	7.09e-06	CRYAB	crystallin alpha B	1410
ENSG00000166922	134.4	1.69	0.252862	6.69748	2.12e-11	3.71e-09	SCG5	secretogranin V	6447
ENSG00000110900	7.1	1.69	0.341499	4.91838	8.73e-07	2.45e-05	TSPAN11	tetraspanin 11	441631
ENSG00000206262	5.64	1.69	0.317435	5.17082	2.33e-07	8.44e-06	FOXL2NB	FOXL2 neighbor	401089
ENSG00000144191	3.29	1.69	0.347431	4.933	8.1e-07	2.31e-05	CNGA3	cyclic nucleotide gated channel subunit alpha 3	1261
ENSG00000185532	324.99	1.68	0.259465	6.49523	8.29e-11	1.11e-08	PRKG1	protein kinase cGMP-dependent 1	5592
ENSG00000225210	56.11	1.68	0.32502	5.21356	1.85e-07	6.93e-06	DUXAP9	double homeobox A pseudogene 9	503638
ENSG00000140030	11.49	1.68	0.346857	5.02289	5.09e-07	1.59e-05	GPR65	G protein-coupled receptor 65	8477
ENSG00000206538	3519.05	1.67	0.257945	6.47627	9.4e-11	1.21e-08	VGLL3	vestigial like family member 3	389136
ENSG00000113389	495.18	1.67	0.298584	5.60464	2.09e-08	1.12e-06	NPR3	natriuretic peptide receptor 3	4883
ENSG00000176658	482.2	1.67	0.249707	6.71224	1.92e-11	3.45e-09	MYO1D	myosin ID	4642
ENSG00000163431	23.49	1.67	0.331687	3.31761	0.000907912	0.00533443	LMOD1	leiomodin 1	25802
ENSG00000106565	10.17	1.67	0.344165	5.44339	5.23e-08	2.42e-06	TMEM176B	transmembrane protein 176B	28959
ENSG00000217236	2.3	1.67	0.341618	5.16825	2.36e-07	8.54e-06	SP9	Sp9 transcription factor	100131390
ENSG00000169439	641.02	1.66	0.249642	6.64918	2.95e-11	4.93e-09	SDC2	syndecan 2	6383
ENSG00000172159	501.92	1.66	0.255605	6.49982	8.04e-11	1.1e-08	FRMD3	FERM domain containing 3	257019
ENSG00000114771	49.42	1.66	0.346553	5.39312	6.92e-08	3.05e-06	AADAC	arylacetamide deacetylase	13
ENSG00000163219	37.99	1.66	0.347445	5.12338	3e-07	1.03e-05	ARHGAP25	Rho GTPase activating protein 25	9938
ENSG00000250748	14.21	1.66	0.326047	5.08264	3.72e-07	1.23e-05	LOC105369187	uncharacterized LOC105369187	105369187
ENSG00000120279	0.85	1.66	0.345066	1.86343	0.0624013	0.14217	MYCT1	MYC target 1	80177
ENSG00000149212	246.78	1.65	0.289307	5.71427	1.1e-08	6.8e-07	SESN3	sestrin 3	143686
ENSG00000175264	25.2	1.65	0.3306	5.01803	5.22e-07	1.62e-05	CHST1	carbohydrate sulfotransferase 1	8534
ENSG00000221866	24.57	1.65	0.344763	4.94658	7.55e-07	2.19e-05	PLXNA4	plexin A4	91584
ENSG00000078725	11.07	1.65	0.294223	5.53694	3.08e-08	1.54e-06	BRINP1	BMP/retinoic acid inducible neural specific 1	1620
ENSG00000100234	3529.65	1.64	0.271222	6.059	1.37e-09	1.16e-07	TIMP3	TIMP metallopeptidase inhibitor 3	7078
ENSG00000152527	264.47	1.64	0.235982	6.95642	3.49e-12	8.4e-10	PLEKHH2	pleckstrin homology, MyTH4 and FERM domain containing H2	130271
ENSG00000127507	99.57	1.64	0.330886	5.02233	5.1e-07	1.59e-05	ADGRE2	adhesion G protein-coupled receptor E2	30817
ENSG00000244306	97.12	1.64	0.329387	5.05166	4.38e-07	1.39e-05	DUXAP10	double homeobox A pseudogene 10	503639
ENSG00000104490	40.05	1.64	0.340381	4.93885	7.86e-07	2.27e-05	NCALD	neurocalcin delta	83988
ENSG00000178222	28.02	1.64	0.291204	5.63787	1.72e-08	9.66e-07	RNF212	ring finger protein 212	285498
ENSG00000138185	6.04	1.64	0.339622	4.75911	1.94e-06	4.64e-05	ENTPD1	ectonucleoside triphosphate diphosphohydrolase 1	953
ENSG00000254343	3.37	1.64	0.331612	2.65059	0.00803518	0.0293232	NA	NA	NA
ENSG00000140678	3.33	1.64	0.34661	4.55277	5.29e-06	0.000101471	ITGAX	integrin subunit alpha X	3687
ENSG00000256915	3.15	1.64	0.317997	4.83195	1.35e-06	3.48e-05	NA	NA	NA
ENSG00000198948	344.85	1.63	0.307294	5.31795	1.05e-07	4.34e-06	MFAP3L	microfibril associated protein 3 like	9848
ENSG00000174938	95.25	1.63	0.20569	7.90904	2.59e-15	1.51e-12	SEZ6L2	seizure related 6 homolog like 2	26470
ENSG00000176595	19.82	1.63	0.32713	5.0098	5.45e-07	1.68e-05	KBTBD11	kelch repeat and BTB domain containing 11	9920
ENSG00000187068	18.05	1.63	0.325286	5.01158	5.4e-07	1.67e-05	C3orf70	chromosome 3 open reading frame 70	285382
ENSG00000180739	12.11	1.63	0.344513	4.83446	1.34e-06	3.46e-05	S1PR5	sphingosine-1-phosphate receptor 5	53637
ENSG00000148655	6.15	1.63	0.331272	4.83359	1.34e-06	3.47e-05	LRMDA	leucine rich melanocyte differentiation associated	83938
ENSG00000115380	4880.89	1.62	0.299272	5.44648	5.14e-08	2.4e-06	EFEMP1	EGF containing fibulin extracellular matrix protein 1	2202
ENSG00000163453	2454.49	1.62	0.335616	4.9331	8.09e-07	2.31e-05	IGFBP7	insulin like growth factor binding protein 7	3490
ENSG00000101680	901.48	1.62	0.244895	6.60684	3.93e-11	6.3e-09	LAMA1	laminin subunit alpha 1	284217
ENSG00000148344	751.79	1.62	0.257138	6.31325	2.73e-10	3.11e-08	PTGES	prostaglandin E synthase	9536
ENSG00000002933	5.79	1.62	0.34005	5.68342	1.32e-08	7.8e-07	TMEM176A	transmembrane protein 176A	55365
ENSG00000155307	5.2	1.62	0.344818	4.65597	3.22e-06	6.85e-05	SAMSN1	SAM domain, SH3 domain and nuclear localization signals 1	64092
ENSG00000225684	56.79	1.61	0.271944	5.90252	3.58e-09	2.65e-07	FAM225B	family with sequence similarity 225 member B	100128385
ENSG00000249669	39.61	1.61	0.305441	5.29772	1.17e-07	4.78e-06	NA	NA	NA
ENSG00000100100	29.96	1.61	0.275996	5.80524	6.43e-09	4.37e-07	PIK3IP1	phosphoinositide-3-kinase interacting protein 1	113791
ENSG00000225756	11.8	1.61	0.340369	5.77224	7.82e-09	5.09e-07	DBH-AS1	DBH antisense RNA 1	138948
ENSG00000137266	329.39	1.6	0.276681	5.79393	6.88e-09	4.59e-07	SLC22A23	solute carrier family 22 member 23	63027
ENSG00000183486	55.3	1.6	0.272511	5.85065	4.9e-09	3.45e-07	MX2	MX dynamin like GTPase 2	4600
ENSG00000223485	29.05	1.6	0.327307	4.93588	7.98e-07	2.29e-05	LINC01615	long intergenic non-protein coding RNA 1615	101929484
ENSG00000113205	8.64	1.6	0.345107	4.70587	2.53e-06	5.67e-05	PCDHB3	protocadherin beta 3	56132
ENSG00000126733	4.46	1.6	0.34674	4.70342	2.56e-06	5.72e-05	DACH2	dachshund family transcription factor 2	117154
ENSG00000185686	2.24	1.6	0.342527	4.92088	8.62e-07	2.43e-05	PRAME	PRAME nuclear receptor transcriptional regulator	23532
ENSG00000158859	540.88	1.59	0.256134	6.21716	5.06e-10	5.1e-08	ADAMTS4	ADAM metallopeptidase with thrombospondin type 1 motif 4	9507
ENSG00000169071	162.38	1.59	0.274169	5.81295	6.14e-09	4.23e-07	ROR2	receptor tyrosine kinase like orphan receptor 2	4920
ENSG00000086696	20.47	1.59	0.346165	5.07434	3.89e-07	1.27e-05	HSD17B2	hydroxysteroid 17-beta dehydrogenase 2	3294
ENSG00000052850	4.62	1.59	0.346918	4.56199	5.07e-06	9.81e-05	ALX4	ALX homeobox 4	60529
ENSG00000253139	2.56	1.59	0.346032	4.82992	1.37e-06	3.5e-05	NA	NA	NA
ENSG00000122862	4473.19	1.58	0.279706	5.66892	1.44e-08	8.28e-07	SRGN	serglycin	5552
ENSG00000099998	430.31	1.58	0.288385	5.49939	3.81e-08	1.86e-06	GGT5	gamma-glutamyltransferase 5	2687
ENSG00000165092	96.03	1.58	0.347445	4.89426	9.87e-07	2.7e-05	ALDH1A1	aldehyde dehydrogenase 1 family member A1	216
ENSG00000237945	34.27	1.58	0.284145	5.53919	3.04e-08	1.54e-06	LINC00649	long intergenic non-protein coding RNA 649	100506334
ENSG00000165323	20.39	1.58	0.336533	4.73293	2.21e-06	5.16e-05	FAT3	FAT atypical cadherin 3	120114
ENSG00000119915	10.11	1.58	0.287834	5.42455	5.81e-08	2.66e-06	ELOVL3	ELOVL fatty acid elongase 3	83401
ENSG00000261115	5.11	1.58	0.346504	2.68059	0.00734921	0.0273275	TMEM178B	transmembrane protein 178B	100507421
ENSG00000260777	3.39	1.58	0.317991	4.71584	2.41e-06	5.49e-05	NA	NA	NA
ENSG00000080573	762.81	1.57	0.305848	5.16311	2.43e-07	8.72e-06	COL5A3	collagen type V alpha 3 chain	50509
ENSG00000124343	183.37	1.57	0.287682	5.45393	4.93e-08	2.32e-06	XG	Xg glycoprotein (Xg blood group)	7499
ENSG00000152580	139.84	1.57	0.288773	5.44895	5.07e-08	2.37e-06	IGSF10	immunoglobulin superfamily member 10	285313
ENSG00000147119	111.2	1.57	0.258945	6.06069	1.36e-09	1.16e-07	CHST7	carbohydrate sulfotransferase 7	56548
ENSG00000152268	65.64	1.57	0.346465	4.60326	4.16e-06	8.38e-05	NA	NA	NA
ENSG00000118292	26.72	1.57	0.301019	5.20678	1.92e-07	7.13e-06	C1orf54	chromosome 1 open reading frame 54	79630
ENSG00000111110	14.4	1.57	0.323993	4.85408	1.21e-06	3.21e-05	PPM1H	protein phosphatase, Mg2+/Mn2+ dependent 1H	57460
ENSG00000248810	14.18	1.57	0.331204	4.77233	1.82e-06	4.4e-05	LINC02432	long intergenic non-protein coding RNA 2432	100507639
ENSG00000171502	13.5	1.57	0.25785	6.01784	1.77e-09	1.42e-07	COL24A1	collagen type XXIV alpha 1 chain	255631
ENSG00000115896	13.17	1.57	0.342633	4.65587	3.23e-06	6.85e-05	PLCL1	phospholipase C like 1 (inactive)	5334
ENSG00000166546	3.78	1.57	0.31947	4.70824	2.5e-06	5.61e-05	BEAN1	brain expressed associated with NEDD4 1	146227
ENSG00000170542	229.77	1.56	0.257425	6.05842	1.37e-09	1.16e-07	SERPINB9	serpin family B member 9	5272
ENSG00000144476	75.13	1.56	0.34051	4.69656	2.65e-06	5.87e-05	ACKR3	atypical chemokine receptor 3	57007
ENSG00000088320	2.34	1.56	0.346493	4.36618	1.26e-05	0.000200201	REM1	RRAD and GEM like GTPase 1	28954
ENSG00000183807	15.19	1.55	0.345944	4.59696	4.29e-06	8.61e-05	FAM162B	family with sequence similarity 162 member B	221303
ENSG00000164935	10.6	1.55	0.33422	4.63308	3.6e-06	7.46e-05	DCSTAMP	dendrocyte expressed seven transmembrane protein	81501
ENSG00000215246	5.1	1.55	0.346741	4.47991	7.47e-06	0.00013352	LOC100506688	uncharacterized LOC100506688	100506688
ENSG00000179954	468.67	1.54	0.270972	5.69597	1.23e-08	7.38e-07	SSC5D	scavenger receptor cysteine rich family member with 5 domains	284297
ENSG00000128567	334.46	1.54	0.310253	5.00601	5.56e-07	1.7e-05	PODXL	podocalyxin like	5420
ENSG00000106236	53.85	1.54	0.341994	4.60856	4.05e-06	8.23e-05	NPTX2	neuronal pentraxin 2	4885
ENSG00000115590	47.79	1.54	0.272188	5.64821	1.62e-08	9.21e-07	IL1R2	interleukin 1 receptor type 2	7850
ENSG00000060140	11.97	1.54	0.283703	5.37298	7.74e-08	3.33e-06	STYK1	serine/threonine/tyrosine kinase 1	55359
ENSG00000163485	3.96	1.54	0.347444	4.38299	1.17e-05	0.000188298	ADORA1	adenosine A1 receptor	134
ENSG00000106483	3.14	1.54	0.343593	2.85921	0.00424705	0.0177767	SFRP4	secreted frizzled related protein 4	6424
ENSG00000129038	702.89	1.53	0.276262	5.53744	3.07e-08	1.54e-06	LOXL1	lysyl oxidase like 1	4016
ENSG00000168477	345.3	1.53	0.347106	4.81613	1.46e-06	3.7e-05	TNXB	tenascin XB	7148
ENSG00000003400	64.66	1.53	0.227185	6.70922	1.96e-11	3.49e-09	CASP10	caspase 10	843
ENSG00000152779	27.77	1.53	0.275941	5.51528	3.48e-08	1.71e-06	SLC16A12	solute carrier family 16 member 12	387700
ENSG00000149564	16.59	1.53	0.29704	5.14619	2.66e-07	9.36e-06	ESAM	endothelial cell adhesion molecule	90952
ENSG00000164946	5.78	1.53	0.347316	4.53098	5.87e-06	0.000109961	FREM1	FRAS1 related extracellular matrix 1	158326
ENSG00000163531	202.15	1.52	0.332106	4.64011	3.48e-06	7.26e-05	NFASC	neurofascin	23114
ENSG00000129009	189.53	1.52	0.335577	4.60936	4.04e-06	8.2e-05	ISLR	immunoglobulin superfamily containing leucine rich repeat	3671
ENSG00000229847	24.41	1.52	0.345399	4.54821	5.41e-06	0.000103242	EMX2OS	EMX2 opposite strand/antisense RNA	196047
ENSG00000138135	6.78	1.52	0.341068	4.45572	8.36e-06	0.00014464	CH25H	cholesterol 25-hydroxylase	9023
ENSG00000162458	919.19	1.51	0.217034	6.94641	3.75e-12	8.91e-10	FBLIM1	filamin binding LIM protein 1	54751
ENSG00000239332	152.41	1.51	0.219088	6.86992	6.42e-12	1.37e-09	LINC01119	long intergenic non-protein coding RNA 1119	100134259
ENSG00000182022	115.14	1.51	0.319328	4.75708	1.96e-06	4.67e-05	CHST15	carbohydrate sulfotransferase 15	51363
ENSG00000072163	94.97	1.51	0.334943	4.58183	4.61e-06	9.1e-05	LIMS2	LIM zinc finger domain containing 2	55679
ENSG00000007933	6.43	1.51	0.336649	5.60579	2.07e-08	1.12e-06	FMO3	flavin containing dimethylaniline monoxygenase 3	2328
ENSG00000164764	4.46	1.51	0.340819	2.52891	0.0114417	0.0383002	SBSPON	somatomedin B and thrombospondin type 1 domain containing	157869
ENSG00000237181	1.78	1.51	0.345172	4.53179	5.85e-06	0.000109758	NA	NA	NA
ENSG00000154175	1987.07	1.5	0.333961	4.57286	4.81e-06	9.42e-05	ABI3BP	ABI family member 3 binding protein	25890
ENSG00000164125	784.11	1.5	0.228323	6.58424	4.57e-11	7.04e-09	GASK1B	golgi associated kinase 1B	51313
ENSG00000172164	193.12	1.5	0.298808	5.02608	5.01e-07	1.57e-05	SNTB1	syntrophin beta 1	6641
ENSG00000130303	11.61	1.5	0.334873	6.05682	1.39e-09	1.17e-07	BST2	bone marrow stromal cell antigen 2	684
ENSG00000150594	8.72	1.5	0.338562	4.45361	8.44e-06	0.000145942	ADRA2A	adrenoceptor alpha 2A	150
ENSG00000108932	38.95	1.49	0.33732	4.47556	7.62e-06	0.000135002	SLC16A6	solute carrier family 16 member 6	9120
ENSG00000162591	35.15	1.49	0.341013	5.25443	1.48e-07	5.67e-06	MEGF6	multiple EGF like domains 6	1953
ENSG00000231106	21.54	1.49	0.339292	4.46325	8.07e-06	0.000141041	NA	NA	NA
ENSG00000234380	13.84	1.49	0.27244	5.44053	5.31e-08	2.45e-06	LINC01426	long intergenic non-protein coding RNA 1426	100506385
ENSG00000249464	4.9	1.49	0.331222	4.41758	9.98e-06	0.000166969	LINC01091	long intergenic non-protein coding RNA 1091	285419
ENSG00000272347	1.43	1.49	0.346399	4.26798	1.97e-05	0.000280711	NA	NA	NA
ENSG00000132205	329.44	1.48	0.237812	6.22028	4.96e-10	5.08e-08	EMILIN2	elastin microfibril interfacer 2	84034
ENSG00000162804	324.95	1.48	0.334904	4.4735	7.7e-06	0.000136052	SNED1	sushi, nidogen and EGF like domains 1	25992
ENSG00000134198	29.14	1.48	0.323086	4.60667	4.09e-06	8.28e-05	TSPAN2	tetraspanin 2	10100
ENSG00000174325	2.01	1.48	0.345795	4.15036	3.32e-05	0.000421873	NA	NA	NA
ENSG00000258711	1.76	1.48	0.343996	4.08995	4.31e-05	0.000518578	NA	NA	NA
ENSG00000112769	9992.84	1.47	0.22828	6.42547	1.31e-10	1.64e-08	LAMA4	laminin subunit alpha 4	3910
ENSG00000113083	9242.19	1.47	0.285091	5.15334	2.56e-07	9.06e-06	LOX	lysyl oxidase	4015
ENSG00000203805	97.48	1.47	0.332179	4.48681	7.23e-06	0.000129971	PLPP4	phospholipid phosphatase 4	196051
ENSG00000170370	49.15	1.47	0.339782	4.40449	1.06e-05	0.000174309	EMX2	empty spiracles homeobox 2	2018
ENSG00000175426	48.74	1.47	0.323302	4.57778	4.7e-06	9.26e-05	PCSK1	proprotein convertase subtilisin/kexin type 1	5122
ENSG00000159212	33.67	1.47	0.311664	4.72884	2.26e-06	5.21e-05	CLIC6	chloride intracellular channel 6	54102
ENSG00000174600	30.5	1.47	0.341358	5.07975	3.78e-07	1.24e-05	CMKLR1	chemerin chemokine-like receptor 1	1240
ENSG00000130755	11.94	1.47	0.340814	4.35959	1.3e-05	0.000203644	GMFG	glia maturation factor gamma	9535
ENSG00000099937	34.71	1.46	0.316258	4.63045	3.65e-06	7.53e-05	SERPIND1	serpin family D member 1	3053
ENSG00000215018	12.31	1.46	0.313468	4.65289	3.27e-06	6.92e-05	COL28A1	collagen type XXVIII alpha 1 chain	340267
ENSG00000170412	6.45	1.46	0.347424	4.32013	1.56e-05	0.000234018	GPRC5C	G protein-coupled receptor class C group 5 member C	55890
ENSG00000183091	6.42	1.46	0.264377	2.50094	0.0123863	0.0407249	NEB	nebulin	4703
ENSG00000116991	149.31	1.45	0.31904	4.56105	5.09e-06	9.84e-05	SIPA1L2	signal induced proliferation associated 1 like 2	57568
ENSG00000189337	109.99	1.45	0.28993	5.00164	5.68e-07	1.73e-05	KAZN	kazrin, periplakin interacting protein	23254
ENSG00000170873	53.66	1.45	0.334701	4.38169	1.18e-05	0.000189256	MTSS1	MTSS I-BAR domain containing 1	9788
ENSG00000108786	31.39	1.45	0.241775	5.9624	2.49e-09	1.92e-07	HSD17B1	hydroxysteroid 17-beta dehydrogenase 1	3292
ENSG00000132185	10.68	1.45	0.33451	4.32934	1.5e-05	0.000227272	FCRLA	Fc receptor like A	84824
ENSG00000004399	1618.07	1.44	0.257392	5.61923	1.92e-08	1.06e-06	PLXND1	plexin D1	23129
ENSG00000030419	541.18	1.44	0.263408	5.45404	4.92e-08	2.32e-06	IKZF2	IKAROS family zinc finger 2	22807
ENSG00000114698	397.55	1.44	0.256909	5.59597	2.19e-08	1.17e-06	PLSCR4	phospholipid scramblase 4	57088
ENSG00000196139	340.55	1.44	0.284808	5.05975	4.2e-07	1.35e-05	AKR1C3	aldo-keto reductase family 1 member C3	8644
ENSG00000081052	206.33	1.44	0.341463	4.30788	1.65e-05	0.000242997	COL4A4	collagen type IV alpha 4 chain	1286
ENSG00000168916	120.69	1.44	0.300472	4.80325	1.56e-06	3.89e-05	ZNF608	zinc finger protein 608	57507
ENSG00000145506	44.64	1.44	0.336827	4.32309	1.54e-05	0.000231873	NKD2	NKD inhibitor of WNT signaling pathway 2	85409
ENSG00000145423	32.83	1.44	0.335291	5.78312	7.33e-09	4.82e-07	SFRP2	secreted frizzled related protein 2	6423
ENSG00000253864	14.33	1.44	0.32002	4.50874	6.52e-06	0.00011981	NA	NA	NA
ENSG00000135114	10.16	1.44	0.302301	4.71532	2.41e-06	5.49e-05	OASL	2'-5'-oligoadenylate synthetase like	8638
ENSG00000235688	2.52	1.44	0.337568	4.71374	2.43e-06	5.5e-05	NA	NA	NA
ENSG00000096696	1980.25	1.43	0.347028	4.30959	1.64e-05	0.000241683	DSP	desmoplakin	1832
ENSG00000198848	376.46	1.43	0.347463	4.36169	1.29e-05	0.000202977	CES1	carboxylesterase 1	1066
ENSG00000078596	14.17	1.43	0.346674	4.41793	9.97e-06	0.000166844	ITM2A	integral membrane protein 2A	9452
ENSG00000083067	10.96	1.43	0.344202	4.2236	2.4e-05	0.000326238	TRPM3	transient receptor potential cation channel subfamily M member 3	80036
ENSG00000268894	8.26	1.43	0.347433	4.25368	2.1e-05	0.00029467	PLCE1-AS1	PLCE1 antisense RNA 1	100128054
ENSG00000205363	7.98	1.43	0.317607	4.47227	7.74e-06	0.000136474	INSYN1	inhibitory synaptic factor 1	388135
ENSG00000100055	6.73	1.43	0.284046	4.95522	7.22e-07	2.11e-05	CYTH4	cytohesin 4	27128
ENSG00000129465	5.69	1.43	0.345964	4.16814	3.07e-05	0.000396027	RIPK3	receptor interacting serine/threonine kinase 3	11035
ENSG00000161381	4.74	1.43	0.346751	4.23318	2.3e-05	0.000315297	PLXDC1	plexin domain containing 1	57125
ENSG00000183153	3.29	1.43	0.343287	4.04909	5.14e-05	0.000590675	GJD3	gap junction protein delta 3	125111
ENSG00000261332	2.13	1.43	0.341555	4.46749	7.91e-06	0.000138779	NA	NA	NA
ENSG00000236013	1.64	1.43	0.346867	4.04805	5.16e-05	0.000592257	LOC100507477	uncharacterized LOC100507477	100507477
ENSG00000123360	1.46	1.43	0.341154	4.29187	1.77e-05	0.000258046	PDE1B	phosphodiesterase 1B	5153
ENSG00000101335	4002.83	1.42	0.23638	6.03021	1.64e-09	1.34e-07	MYL9	myosin light chain 9	10398
ENSG00000123572	377.29	1.42	0.332751	4.31635	1.59e-05	0.000236762	NRK	Nik related kinase	203447
ENSG00000168679	262.99	1.42	0.264905	5.37091	7.83e-08	3.36e-06	SLC16A4	solute carrier family 16 member 4	9122
ENSG00000136040	100.36	1.42	0.271458	5.22694	1.72e-07	6.47e-06	PLXNC1	plexin C1	10154
ENSG00000127472	3.29	1.42	0.343606	4.41607	1.01e-05	0.000167702	PLA2G5	phospholipase A2 group V	5322
ENSG00000269113	1.98	1.42	0.3324	3.43061	0.000602227	0.00390545	TRABD2B	TraB domain containing 2B	388630
ENSG00000118113	7.89	1.41	0.347403	4.18501	2.85e-05	0.000373492	MMP8	matrix metallopeptidase 8	4317
ENSG00000158258	6.05	1.41	0.345817	4.10224	4.09e-05	0.0004976	CLSTN2	calsyntenin 2	64084
ENSG00000233354	1.01	1.41	0.344362	4.07554	4.59e-05	0.000541945	LINC00028	long intergenic non-protein coding RNA 28	140875
ENSG00000130066	3349.51	1.4	0.191383	7.3069	2.73e-13	9.4e-11	SAT1	spermidine/spermine N1-acetyltransferase 1	6303
ENSG00000010810	1269.33	1.4	0.214857	6.50127	7.96e-11	1.1e-08	FYN	FYN proto-oncogene, Src family tyrosine kinase	2534
ENSG00000171051	132.98	1.4	0.313866	4.49728	6.88e-06	0.000125614	FPR1	formyl peptide receptor 1	2357
ENSG00000162711	11.4	1.4	0.342059	4.14155	3.45e-05	0.000434687	NLRP3	NLR family pyrin domain containing 3	114548
ENSG00000249242	7.08	1.4	0.343623	4.09742	4.18e-05	0.000505281	TMEM150C	transmembrane protein 150C	441027
ENSG00000271127	6.1	1.4	0.335085	4.1342	3.56e-05	0.000445018	NA	NA	NA
ENSG00000173391	4.32	1.4	0.346757	2.49825	0.0124807	0.0409654	OLR1	oxidized low density lipoprotein receptor 1	4973
ENSG00000237989	2.51	1.4	0.347462	3.95059	7.8e-05	0.000812681	LINC01679	long intergenic non-protein coding RNA 1679	101928399
ENSG00000178602	1.36	1.4	0.347284	4.02782	5.63e-05	0.000630137	OTOS	otospiralin	150677
ENSG00000130635	19562.7	1.39	0.222139	6.25986	3.85e-10	4.1e-08	COL5A1	collagen type V alpha 1 chain	1289
ENSG00000149090	456.71	1.39	0.274255	5.08454	3.69e-07	1.22e-05	PAMR1	peptidase domain containing associated with muscle regeneration 1	25891
ENSG00000175274	410.14	1.39	0.289478	4.80726	1.53e-06	3.84e-05	TP53I11	tumor protein p53 inducible protein 11	9537
ENSG00000178726	353.21	1.39	0.289663	4.80816	1.52e-06	3.83e-05	THBD	thrombomodulin	7056
ENSG00000198947	273.35	1.39	0.301129	4.6203	3.83e-06	7.85e-05	DMD	dystrophin	1756
ENSG00000204397	40.8	1.39	0.259884	5.35268	8.67e-08	3.67e-06	CARD16	caspase recruitment domain family member 16	114769
ENSG00000062282	29.33	1.39	0.294772	4.70028	2.6e-06	5.78e-05	DGAT2	diacylglycerol O-acyltransferase 2	84649
ENSG00000157399	28.3	1.39	0.241915	5.74521	9.18e-09	5.8e-07	ARSL	arylsulfatase L	415
ENSG00000061455	11.25	1.39	0.288042	4.77909	1.76e-06	4.29e-05	PRDM6	PR/SET domain 6	93166
ENSG00000168398	196.57	1.38	0.294197	4.68807	2.76e-06	6.08e-05	BDKRB2	bradykinin receptor B2	624
ENSG00000211445	92.89	1.38	0.323023	4.28891	1.8e-05	0.000260719	GPX3	glutathione peroxidase 3	2878
ENSG00000137960	84.84	1.38	0.205106	6.73469	1.64e-11	2.98e-09	GIPC2	GIPC PDZ domain containing family member 2	54810
ENSG00000164684	13.2	1.38	0.310131	4.4407	8.97e-06	0.000153324	ZNF704	zinc finger protein 704	619279
ENSG00000171772	13.04	1.38	0.34668	4.24278	2.21e-05	0.0003047	SYCE1	synaptonemal complex central element protein 1	93426
ENSG00000245522	12.11	1.38	0.278953	4.90436	9.37e-07	2.59e-05	LINC02709	long intergenic non-protein coding RNA 2709	440028
ENSG00000185052	3.29	1.38	0.339671	4.64998	3.32e-06	7e-05	SLC24A3	solute carrier family 24 member 3	57419
ENSG00000259969	2.73	1.38	0.33943	3.92625	8.63e-05	0.000880751	NA	NA	NA
ENSG00000105270	835.98	1.37	0.210129	6.5237	6.86e-11	9.93e-09	CLIP3	CAP-Gly domain containing linker protein 3	25999
ENSG00000160539	71.24	1.37	0.237016	5.77274	7.8e-09	5.09e-07	PLPP7	phospholipid phosphatase 7 (inactive)	84814
ENSG00000116396	70.63	1.37	0.267983	5.1098	3.22e-07	1.09e-05	KCNC4	potassium voltage-gated channel subfamily C member 4	3749
ENSG00000127951	38.14	1.37	0.346837	1.84269	0.0653744	0.14727	FGL2	fibrinogen like 2	10875
ENSG00000124920	28.81	1.37	0.263873	5.17126	2.33e-07	8.43e-06	MYRF	myelin regulatory factor	745
ENSG00000003137	26.53	1.37	0.325171	4.22767	2.36e-05	0.000321528	CYP26B1	cytochrome P450 family 26 subfamily B member 1	56603
ENSG00000135643	7.47	1.37	0.278131	4.86243	1.16e-06	3.1e-05	KCNMB4	potassium calcium-activated channel subfamily M regulatory beta subunit 4	27345
ENSG00000152977	2.75	1.37	0.345213	3.84105	0.000122508	0.00115343	ZIC1	Zic family member 1	7545
ENSG00000182492	2082.39	1.36	0.316223	4.31811	1.57e-05	0.000235613	BGN	biglycan	633
ENSG00000140285	1264.22	1.36	0.252832	5.365	8.09e-08	3.46e-06	FGF7	fibroblast growth factor 7	2252
ENSG00000145934	160.16	1.36	0.341059	4.06297	4.85e-05	0.000564956	TENM2	teneurin transmembrane protein 2	57451
ENSG00000144891	159.82	1.36	0.256598	5.29615	1.18e-07	4.81e-06	AGTR1	angiotensin II receptor type 1	185
ENSG00000126882	25.86	1.36	0.29523	4.60521	4.12e-06	8.32e-05	FAM78A	family with sequence similarity 78 member A	286336
ENSG00000130433	6.07	1.36	0.327814	4.11161	3.93e-05	0.000480637	CACNG6	calcium voltage-gated channel auxiliary subunit gamma 6	59285
ENSG00000229160	1.88	1.36	0.346439	2.4084	0.0160226	0.0498464	NA	NA	NA
ENSG00000213468	1.47	1.36	0.347389	3.92155	8.8e-05	0.000892525	FIRRE	firre intergenic repeating RNA element	286467
ENSG00000113721	3944.13	1.35	0.232455	5.82802	5.61e-09	3.9e-07	PDGFRB	platelet derived growth factor receptor beta	5159
ENSG00000169760	101.4	1.35	0.318688	4.24461	2.19e-05	0.000303534	NLGN1	neuroligin 1	22871
ENSG00000206195	100.23	1.35	0.336168	4.07289	4.64e-05	0.000545512	DUXAP8	double homeobox A pseudogene 8	503637
ENSG00000164694	60.06	1.35	0.345149	4.30637	1.66e-05	0.000244103	FNDC1	fibronectin type III domain containing 1	84624
ENSG00000237807	34.61	1.35	0.342551	4.00962	6.08e-05	0.000670248	LOC100507516	uncharacterized LOC100507516	100507516
ENSG00000117600	5.84	1.35	0.333061	5.08654	3.65e-07	1.21e-05	PLPPR4	phospholipid phosphatase related 4	9890
ENSG00000125810	4.97	1.35	0.330034	5.17282	2.31e-07	8.41e-06	CD93	CD93 molecule	22918
ENSG00000172554	3.91	1.35	0.344456	4.07013	4.7e-05	0.000551304	SNTG2	syntrophin gamma 2	54221
ENSG00000163736	3.13	1.35	0.326507	3.99279	6.53e-05	0.000707537	PPBP	pro-platelet basic protein	5473
ENSG00000121933	2.92	1.35	0.340758	3.8537	0.000116344	0.0011106	TMIGD3	transmembrane and immunoglobulin domain containing 3	57413
ENSG00000137875	2.89	1.35	0.313126	4.11859	3.81e-05	0.000468394	BCL2L10	BCL2 like 10	10017
ENSG00000139155	1.32	1.35	0.346698	2.06874	0.0385709	0.0978024	SLCO1C1	solute carrier organic anion transporter family member 1C1	53919
ENSG00000155816	368.13	1.34	0.238751	5.613	1.99e-08	1.08e-06	FMN2	formin 2	56776
ENSG00000158887	47.68	1.34	0.209333	6.38551	1.71e-10	2.07e-08	MPZ	myelin protein zero	4359
ENSG00000183691	24.95	1.34	0.310827	4.32503	1.53e-05	0.000230542	NOG	noggin	9241
ENSG00000007944	11.79	1.34	0.333191	4.037	5.41e-05	0.000611022	MYLIP	myosin regulatory light chain interacting protein	29116
ENSG00000120149	11.03	1.34	0.34604	3.96418	7.36e-05	0.000777427	MSX2	msh homeobox 2	4488
ENSG00000103175	8.8	1.34	0.327782	5.7679	8.03e-09	5.2e-07	WFDC1	WAP four-disulfide core domain 1	58189
ENSG00000180777	3.76	1.34	0.329271	4.26004	2.04e-05	0.000288305	ANKRD30B	ankyrin repeat domain 30B	374860
ENSG00000186148	3.16	1.34	0.341001	3.84576	0.000120181	0.0011382	LOC440895	two pore channel 3 pseudogene	440895
ENSG00000250120	2.88	1.34	0.33774	4.39079	1.13e-05	0.000182754	PCDHA10	protocadherin alpha 10	56139
ENSG00000187498	12263.3	1.33	0.278911	4.76974	1.84e-06	4.45e-05	COL4A1	collagen type IV alpha 1 chain	1282
ENSG00000077420	340.13	1.33	0.309893	4.30465	1.67e-05	0.000245629	APBB1IP	amyloid beta precursor protein binding family B member 1 interacting protein	54518
ENSG00000118473	185.46	1.33	0.282528	4.71349	2.44e-06	5.5e-05	SGIP1	SH3GL interacting endocytic adaptor 1	84251
ENSG00000125089	58.26	1.33	0.301365	4.4165	1e-05	0.000167512	SH3TC1	SH3 domain and tetratricopeptide repeats 1	54436
ENSG00000109610	25.83	1.33	0.32807	4.06927	4.72e-05	0.000552982	SOD3	superoxide dismutase 3	6649
ENSG00000205456	5.29	1.33	0.346885	3.88348	0.000102973	0.00100898	TP53TG3D	TP53 target 3D	729264
ENSG00000203721	3.86	1.33	0.342266	3.84133	0.000122369	0.00115269	LINC00862	long intergenic non-protein coding RNA 862	554279
ENSG00000126467	2.42	1.33	0.344621	4.03348	5.5e-05	0.000618078	TSKS	testis specific serine kinase substrate	60385
ENSG00000122641	5793.32	1.32	0.283891	4.66342	3.11e-06	6.69e-05	INHBA	inhibin subunit beta A	3624
ENSG00000197381	665.32	1.32	0.255094	5.18208	2.19e-07	8.08e-06	ADARB1	adenosine deaminase RNA specific B1	104
ENSG00000163064	131.77	1.32	0.294341	4.49257	7.04e-06	0.000127701	EN1	engrailed homeobox 1	2019
ENSG00000171509	13.39	1.32	0.324648	4.07319	4.64e-05	0.000545432	RXFP1	relaxin family peptide receptor 1	59350
ENSG00000080031	8.69	1.32	0.301231	4.34214	1.41e-05	0.000216742	PTPRH	protein tyrosine phosphatase receptor type H	5794
ENSG00000196932	5.84	1.32	0.3365	3.90114	9.57e-05	0.000952659	TMEM26	transmembrane protein 26	219623
ENSG00000167619	4.42	1.32	0.325722	-1.83744	0.0661444	0.14848	TMEM145	transmembrane protein 145	284339
ENSG00000120708	85450.9	1.31	0.250141	5.22812	1.71e-07	6.45e-06	TGFBI	transforming growth factor beta induced	7045
ENSG00000197632	891.63	1.31	0.340653	3.91374	9.09e-05	0.00091657	SERPINB2	serpin family B member 2	5055
ENSG00000141338	384.67	1.31	0.301484	4.36068	1.3e-05	0.000202977	ABCA8	ATP binding cassette subfamily A member 8	10351
ENSG00000170577	40.97	1.31	0.309034	4.26482	2e-05	0.00028324	SIX2	SIX homeobox 2	10736
ENSG00000168229	27.56	1.31	0.326646	4.02923	5.6e-05	0.000626803	PTGDR	prostaglandin D2 receptor	5729
ENSG00000182902	22.03	1.31	0.306276	4.26707	1.98e-05	0.00028102	SLC25A18	solute carrier family 25 member 18	83733
ENSG00000225968	17.1	1.31	0.29146	4.47935	7.49e-06	0.00013352	ELFN1	extracellular leucine rich repeat and fibronectin type III domain containing 1	392617
ENSG00000111452	14.97	1.31	0.347462	3.94199	8.08e-05	0.000835585	ADGRD1	adhesion G protein-coupled receptor D1	283383
ENSG00000259345	12.77	1.31	0.292165	4.46238	8.11e-06	0.00014136	NA	NA	NA
ENSG00000198576	11.81	1.31	0.312043	4.17837	2.94e-05	0.000382488	ARC	activity regulated cytoskeleton associated protein	23237
ENSG00000226598	3.6	1.31	0.335223	3.84848	0.000118853	0.00112784	NA	NA	NA
ENSG00000133110	29655.5	1.3	0.305978	4.27586	1.9e-05	0.000273175	POSTN	periostin	10631
ENSG00000100292	1676.33	1.3	0.241618	5.39452	6.87e-08	3.05e-06	HMOX1	heme oxygenase 1	3162
ENSG00000166446	273.72	1.3	0.320529	4.07599	4.58e-05	0.00054122	CDYL2	chromodomain Y like 2	124359
ENSG00000204941	81.66	1.3	0.347425	3.90711	9.34e-05	0.000937169	PSG5	pregnancy specific beta-1-glycoprotein 5	5673
ENSG00000078401	81.26	1.3	0.327663	3.9967	6.42e-05	0.000699906	EDN1	endothelin 1	1906
ENSG00000104237	25.86	1.3	0.268361	4.82559	1.4e-06	3.56e-05	RP1	RP1 axonemal microtubule associated	6101
ENSG00000167554	22.71	1.3	0.313195	4.14527	3.39e-05	0.00042965	ZNF610	zinc finger protein 610	162963
ENSG00000141337	16.2	1.3	0.297455	4.37508	1.21e-05	0.000193997	ARSG	arylsulfatase G	22901
ENSG00000204642	13.88	1.3	0.293902	4.40515	1.06e-05	0.000173961	HLA-F	major histocompatibility complex, class I, F	3134
ENSG00000183914	11.92	1.3	0.345027	3.81866	0.000134177	0.00123906	DNAH2	dynein axonemal heavy chain 2	146754
ENSG00000186297	8.32	1.3	0.343574	3.8341	0.000126025	0.00117791	GABRA5	gamma-aminobutyric acid type A receptor subunit alpha5	2558
ENSG00000260868	7.78	1.3	0.303927	4.23234	2.31e-05	0.000316252	LINC01960	long intergenic non-protein coding RNA 1960	100128905
ENSG00000174945	7.55	1.3	0.303089	4.24441	2.19e-05	0.000303586	AMZ1	archaelysin family metallopeptidase 1	155185
ENSG00000169885	7.06	1.3	0.293188	4.37166	1.23e-05	0.000196207	CALML6	calmodulin like 6	163688
ENSG00000236546	2.12	1.3	0.334879	3.69309	0.000221543	0.00180363	MYCL-AS1	MYCL antisense RNA 1	105378668
ENSG00000198959	8291.73	1.29	0.28801	4.50314	6.7e-06	0.000122428	TGM2	transglutaminase 2	7052
ENSG00000108679	1605.83	1.29	0.217042	5.94505	2.76e-09	2.11e-07	LGALS3BP	galectin 3 binding protein	3959
ENSG00000124126	273.58	1.29	0.25679	5.0195	5.18e-07	1.61e-05	PREX1	phosphatidylinositol-3,4,5-trisphosphate dependent Rac exchange factor 1	57580
ENSG00000184678	92.13	1.29	0.262485	4.91482	8.89e-07	2.48e-05	H2BC21	H2B clustered histone 21	8349
ENSG00000164379	47.48	1.29	0.344723	4.09966	4.14e-05	0.000501994	FOXQ1	forkhead box Q1	94234
ENSG00000268941	22.49	1.29	0.287805	4.47121	7.78e-06	0.00013689	LINC01711	long intergenic non-protein coding RNA 1711	79160
ENSG00000196502	18.64	1.29	0.287832	4.46677	7.94e-06	0.000139124	SULT1A1	sulfotransferase family 1A member 1	6817
ENSG00000118526	9.7	1.29	0.342203	3.79473	0.000147804	0.00133169	TCF21	transcription factor 21	6943
ENSG00000160161	8.74	1.29	0.264676	4.81456	1.48e-06	3.72e-05	CILP2	cartilage intermediate layer protein 2	148113
ENSG00000087589	8.03	1.29	0.340581	3.80781	0.0001402	0.00128236	CASS4	Cas scaffold protein family member 4	57091
ENSG00000169174	6.99	1.29	0.338092	1.19448	0.232291	0.379576	PCSK9	proprotein convertase subtilisin/kexin type 9	255738
ENSG00000117501	4.75	1.29	0.346872	3.74314	0.000181737	0.00155243	MROH9	maestro heat like repeat family member 9	80133
ENSG00000250271	3.18	1.29	0.347344	3.72717	0.000193643	0.00163097	NA	NA	NA
ENSG00000181195	287.79	1.28	0.346501	3.94699	7.91e-05	0.000820983	PENK	proenkephalin	5179
ENSG00000259716	23.49	1.28	0.270581	4.73043	2.24e-06	5.19e-05	NA	NA	NA
ENSG00000156427	17.85	1.28	0.318194	4.02581	5.68e-05	0.000634117	FGF18	fibroblast growth factor 18	8817
ENSG00000227954	6.54	1.28	0.317626	3.99631	6.43e-05	0.000700264	TARID	TCF21 antisense RNA inducing promoter demethylation	100507308
ENSG00000169508	3.4	1.28	0.342665	3.90046	9.6e-05	0.000954865	GPR183	G protein-coupled receptor 183	1880
ENSG00000258819	2.07	1.28	0.339199	4.03871	5.37e-05	0.000608007	LINC02289	long intergenic non-protein coding RNA 2289	102724190
ENSG00000149591	2689.13	1.27	0.338978	3.81604	0.000135609	0.00124607	TAGLN	transgelin	6876
ENSG00000139112	468.18	1.27	0.24053	5.28652	1.25e-07	5e-06	GABARAPL1	GABA type A receptor associated protein like 1	23710
ENSG00000161281	108.2	1.27	0.253758	5.02165	5.12e-07	1.6e-05	COX7A1	cytochrome c oxidase subunit 7A1	1346
ENSG00000158352	72.99	1.27	0.269013	4.73456	2.2e-06	5.12e-05	SHROOM4	shroom family member 4	57477
ENSG00000141524	11.46	1.27	0.332742	3.83718	0.000124453	0.00116798	TMC6	transmembrane channel like 6	11322
ENSG00000158869	11.16	1.27	0.292864	4.31646	1.59e-05	0.000236762	FCER1G	Fc fragment of IgE receptor Ig	2207
ENSG00000185046	7.59	1.27	0.347461	3.74118	0.000183156	0.00156108	ANKS1B	ankyrin repeat and sterile alpha motif domain containing 1B	56899
ENSG00000182870	6.1	1.27	0.338517	3.75414	0.000173935	0.00150245	GALNT9	polypeptide N-acetylgalactosaminyltransferase 9	50614
ENSG00000155966	4.68	1.27	0.346721	3.68529	0.000228445	0.00185121	AFF2	AF4/FMR2 family member 2	2334
ENSG00000198417	3.74	1.27	0.322935	3.84979	0.000118219	0.00112293	MT1F	metallothionein 1F	4494
ENSG00000109452	711.62	1.26	0.158203	7.98075	1.45e-15	9.03e-13	INPP4B	inositol polyphosphate-4-phosphatase type II B	8821
ENSG00000187699	231.23	1.26	0.253184	4.9733	6.58e-07	1.96e-05	C2orf88	chromosome 2 open reading frame 88	84281
ENSG00000099282	8.77	1.26	0.335006	3.76203	0.000168542	0.00146799	TSPAN15	tetraspanin 15	23555
ENSG00000157502	8.13	1.26	0.34623	3.80018	0.00014459	0.00131132	PWWP3B	PWWP domain containing 3B	139221
ENSG00000130477	7.7	1.26	0.340717	3.72626	0.000194341	0.00163471	UNC13A	unc-13 homolog A	23025
ENSG00000109819	5.48	1.26	0.347419	3.71465	0.000203482	0.00169164	PPARGC1A	PPARG coactivator 1 alpha	10891
ENSG00000226674	3.86	1.26	0.347085	3.62081	0.000293685	0.00224925	TEX41	testis expressed 41	401014
ENSG00000253628	3.16	1.26	0.344682	3.74432	0.000180883	0.00154725	NA	NA	NA
ENSG00000248458	3.02	1.26	0.347004	3.59848	0.000320083	0.00240185	NA	NA	NA
ENSG00000172399	2.47	1.26	0.344082	3.54791	0.000388295	0.00279538	MYOZ2	myozenin 2	51778
ENSG00000205212	2.18	1.26	0.334477	4.14528	3.39e-05	0.00042965	CCDC144NL	CCDC144A N-terminal pseudogene	339184
ENSG00000251144	1.96	1.26	0.326859	4.22251	2.42e-05	0.000327354	NA	NA	NA
ENSG00000197635	649.34	1.25	0.340208	3.72132	0.000198183	0.00166122	DPP4	dipeptidyl peptidase 4	1803
ENSG00000165949	186.1	1.25	0.314276	4.00552	6.19e-05	0.000679673	IFI27	interferon alpha inducible protein 27	3429
ENSG00000014257	51.04	1.25	0.322769	3.87853	0.000105091	0.00102348	ACP3	acid phosphatase 3	55
ENSG00000242147	9.87	1.25	0.311182	4.0012	6.3e-05	0.000689434	LINC02677	long intergenic non-protein coding RNA 2677	102723629
ENSG00000089127	7.82	1.25	0.34573	3.80398	0.000142387	0.00129684	OAS1	2'-5'-oligoadenylate synthetase 1	4938
ENSG00000068831	5.29	1.25	0.314801	3.93016	8.49e-05	0.000869377	RASGRP2	RAS guanyl releasing protein 2	10235
ENSG00000163815	3.53	1.25	0.34518	3.70356	0.000212596	0.00174864	CLEC3B	C-type lectin domain family 3 member B	7123
ENSG00000196218	2.3	1.25	0.346079	3.50091	0.00046368	0.00318505	RYR1	ryanodine receptor 1	6261
ENSG00000163081	1.12	1.25	0.336605	3.71933	0.000199752	0.00167039	CCDC140	CCDC140 long non-coding RNA	151278
ENSG00000111252	3619.98	1.24	0.182483	6.81253	9.59e-12	1.96e-09	SH2B3	SH2B adaptor protein 3	10019
ENSG00000165507	44.35	1.24	0.330099	3.79	0.000150647	0.00135035	DEPP1	DEPP1 autophagy regulator	11067
ENSG00000253917	42.66	1.24	0.304192	4.08562	4.4e-05	0.000525379	NA	NA	NA
ENSG00000105088	37.33	1.24	0.339019	3.70843	0.000208549	0.00172687	OLFM2	olfactomedin 2	93145
ENSG00000196074	16.85	1.24	0.221268	5.59361	2.22e-08	1.18e-06	SYCP2	synaptonemal complex protein 2	10388
ENSG00000092758	12.12	1.24	0.33894	3.67307	0.000239656	0.00192746	COL9A3	collagen type IX alpha 3 chain	1299
ENSG00000162630	10.35	1.24	0.346034	3.64676	0.000265569	0.00207772	B3GALT2	beta-1,3-galactosyltransferase 2	8707
ENSG00000169994	7.42	1.24	0.32505	3.79574	0.000147206	0.00132754	MYO7B	myosin VIIB	4648
ENSG00000128573	6.57	1.24	0.346956	3.63661	0.000276245	0.00214225	FOXP2	forkhead box P2	93986
ENSG00000105852	5.72	1.24	0.32263	3.80541	0.000141567	0.00129059	PON3	paraoxonase 3	5446
ENSG00000171631	4.47	1.24	0.345639	3.7291	0.000192165	0.00162136	P2RY6	pyrimidinergic receptor P2Y6	5031
ENSG00000120594	324.03	1.23	0.28555	4.31481	1.6e-05	0.000238158	PLXDC2	plexin domain containing 2	84898
ENSG00000143341	276.16	1.23	0.274747	4.4888	7.16e-06	0.000129248	HMCN1	hemicentin 1	83872
ENSG00000180353	86.89	1.23	0.265373	4.65344	3.26e-06	6.91e-05	HCLS1	hematopoietic cell-specific Lyn substrate 1	3059
ENSG00000231528	68.66	1.23	0.214026	5.7398	9.48e-09	5.94e-07	FAM225A	family with sequence similarity 225 member A	286333
ENSG00000196616	62.49	1.23	0.338689	4.17931	2.92e-05	0.000381163	ADH1B	alcohol dehydrogenase 1B (class I), beta polypeptide	125
ENSG00000164530	35.55	1.23	0.325697	5.41137	6.25e-08	2.83e-06	PI16	peptidase inhibitor 16	221476
ENSG00000170323	5.75	1.23	0.340361	3.93442	8.34e-05	0.000857537	FABP4	fatty acid binding protein 4	2167
ENSG00000182389	4.19	1.23	0.317935	1.22414	0.220899	0.366117	CACNB4	calcium voltage-gated channel auxiliary subunit beta 4	785
ENSG00000189409	1.42	1.23	0.347461	1.78902	0.0736114	0.161315	MMP23B	matrix metallopeptidase 23B	8510
ENSG00000150782	47.67	1.22	0.340859	4.01273	6e-05	0.000664531	IL18	interleukin 18	3606
ENSG00000230699	28.05	1.22	0.299192	4.08232	4.46e-05	0.000530916	NA	NA	NA
ENSG00000183801	17.71	1.22	0.339752	3.6268	0.000286951	0.00220481	OLFML1	olfactomedin like 1	283298
ENSG00000153294	7.98	1.22	0.342184	3.38398	0.000714432	0.00445889	ADGRF4	adhesion G protein-coupled receptor F4	221393
ENSG00000255471	5.51	1.22	0.331526	3.65321	0.000258985	0.0020378	NA	NA	NA
ENSG00000162415	5.13	1.22	0.328891	3.67647	0.000236482	0.00190591	ZSWIM5	zinc finger SWIM-type containing 5	57643
ENSG00000197766	3.97	1.22	0.339622	3.55347	0.000380183	0.00274467	CFD	complement factor D	1675
ENSG00000235890	3.05	1.22	0.344038	3.49364	0.000476475	0.00325264	TSPEAR-AS1	TSPEAR antisense RNA 1	54082
ENSG00000234426	2.24	1.22	0.344149	3.43353	0.000595779	0.00387566	NA	NA	NA
ENSG00000236790	1.08	1.22	0.347463	3.50753	0.000452287	0.00312799	LINC00299	long intergenic non-protein coding RNA 299	339789
ENSG00000148700	3238.57	1.21	0.199611	6.07411	1.25e-09	1.09e-07	ADD3	adducin 3	120
ENSG00000174804	463.02	1.21	0.22826	5.28889	1.23e-07	4.96e-06	FZD4	frizzled class receptor 4	8322
ENSG00000103449	195.15	1.21	0.313087	3.88958	0.000100416	0.000988451	SALL1	spalt like transcription factor 1	6299
ENSG00000152760	54.23	1.21	0.260073	4.63227	3.62e-06	7.48e-05	DYNLT5	dynein light chain Tctex-type family member 5	200132
ENSG00000169031	21	1.21	0.342676	3.59429	0.000325275	0.00243217	COL4A3	collagen type IV alpha 3 chain	1285
ENSG00000196208	14.19	1.21	0.311488	3.89538	9.8e-05	0.000970581	GREB1	growth regulating estrogen receptor binding 1	9687
ENSG00000116852	14.02	1.21	0.328958	3.69713	0.000218055	0.00178202	KIF21B	kinesin family member 21B	23046
ENSG00000196917	11.33	1.21	0.344626	3.55768	0.000374145	0.00270819	HCAR1	hydroxycarboxylic acid receptor 1	27198
ENSG00000106819	5.71	1.21	0.328316	0.56339	0.573169	0.713275	ASPN	asporin	54829
ENSG00000099953	5.56	1.21	0.296625	4.04252	5.29e-05	0.000602303	MMP11	matrix metallopeptidase 11	4320
ENSG00000188828	1.26	1.21	0.326181	3.73343	0.000188891	0.00159724	NA	NA	NA
ENSG00000151632	1322.56	1.2	0.272172	4.42448	9.67e-06	0.000162685	AKR1C2	aldo-keto reductase family 1 member C2	1646
ENSG00000187688	541.49	1.2	0.27287	4.40728	1.05e-05	0.000172834	TRPV2	transient receptor potential cation channel subfamily V member 2	51393
ENSG00000135299	42.8	1.2	0.304848	3.94935	7.84e-05	0.000816005	ANKRD6	ankyrin repeat domain 6	22881
ENSG00000073737	22.76	1.2	0.347324	3.6088	0.000307613	0.00232631	DHRS9	dehydrogenase/reductase 9	10170
ENSG00000149596	19.95	1.2	0.327111	3.69375	0.000220973	0.00179975	JPH2	junctophilin 2	57158
ENSG00000114378	8.86	1.2	0.277987	2.39723	0.0165196	0.0510708	HYAL1	hyaluronidase 1	3373
ENSG00000165194	6.91	1.2	0.314564	3.7999	0.000144752	0.00131217	PCDH19	protocadherin 19	57526
ENSG00000234695	3.71	1.2	0.342469	3.48964	0.000483678	0.00329049	TFPI2-DT	TFPI2 divergent transcript	105375401
ENSG00000174348	3.64	1.2	0.336255	2.21115	0.0270256	0.074538	PODN	podocan	127435
ENSG00000132938	2.78	1.2	0.323023	3.60025	0.000317911	0.00238917	MTUS2	microtubule associated scaffold protein 2	23281
ENSG00000272502	1.9	1.2	0.344191	3.61643	0.000298699	0.0022759	NA	NA	NA
ENSG00000105825	24747.4	1.19	0.224829	5.27265	1.34e-07	5.22e-06	TFPI2	tissue factor pathway inhibitor 2	7980
ENSG00000152377	3397.58	1.19	0.24782	4.79102	1.66e-06	4.08e-05	SPOCK1	SPARC (osteonectin), cwcv and kazal like domains proteoglycan 1	6695
ENSG00000154262	515.01	1.19	0.255381	4.65813	3.19e-06	6.82e-05	ABCA6	ATP binding cassette subfamily A member 6	23460
ENSG00000028277	113.62	1.19	0.342513	3.5254	0.000422836	0.00298203	POU2F2	POU class 2 homeobox 2	5452
ENSG00000169026	62.87	1.19	0.265672	4.49121	7.08e-06	0.000128194	SLC49A3	solute carrier family 49 member 3	84179
ENSG00000142303	40.38	1.19	0.293305	4.04658	5.2e-05	0.000594928	ADAMTS10	ADAM metallopeptidase with thrombospondin type 1 motif 10	81794
ENSG00000133048	36.04	1.19	0.335734	4.13368	3.57e-05	0.000445483	CHI3L1	chitinase 3 like 1	1116
ENSG00000254667	10.19	1.19	0.337978	3.52972	0.000415994	0.00295011	NA	NA	NA
ENSG00000245067	8.29	1.19	0.345775	3.50117	0.000463216	0.003183	IGFBP7-AS1	IGFBP7 antisense RNA 1	255130
ENSG00000272438	5.93	1.19	0.320388	3.68398	0.00022962	0.00185838	NA	NA	NA
ENSG00000188783	4.18	1.19	0.343209	2.2676	0.0233538	0.0667439	PRELP	proline and arginine rich end leucine rich repeat protein	5549
ENSG00000231948	3.62	1.19	0.342031	3.44424	0.000572659	0.003758	HS1BP3-IT1	HS1BP3 intronic transcript 1	100874343
ENSG00000157570	3.54	1.19	0.339605	3.69029	0.000223995	0.00182128	TSPAN18	tetraspanin 18	90139
ENSG00000229951	2.95	1.19	0.345594	3.40822	0.000653894	0.00416752	FOSL2-AS1	FOSL2 antisense RNA 1	403150
ENSG00000213949	1545.59	1.18	0.179327	6.58736	4.48e-11	7e-09	ITGA1	integrin subunit alpha 1	3672
ENSG00000004799	1543.93	1.18	0.341314	1.77592	0.0757459	0.164885	PDK4	pyruvate dehydrogenase kinase 4	5166
ENSG00000175040	1319	1.18	0.238386	4.96919	6.72e-07	2e-05	CHST2	carbohydrate sulfotransferase 2	9435
ENSG00000171246	925.42	1.18	0.306093	3.87544	0.000106432	0.00103288	NPTX1	neuronal pentraxin 1	4884
ENSG00000111057	383.52	1.18	0.299128	3.96937	7.21e-05	0.000764471	KRT18	keratin 18	3875
ENSG00000060718	272.99	1.18	0.332226	3.57651	0.000348214	0.00255605	COL11A1	collagen type XI alpha 1 chain	1301
ENSG00000253161	47.18	1.18	0.263491	4.46358	8.06e-06	0.000140951	NA	NA	NA
ENSG00000063127	8.67	1.18	0.277134	4.22051	2.44e-05	0.000329581	SLC6A16	solute carrier family 6 member 16	28968
ENSG00000112981	7.5	1.18	0.299662	3.89702	9.74e-05	0.000965495	NME5	NME/NM23 family member 5	8382
ENSG00000168955	4.15	1.18	0.34558	3.4132	0.000642051	0.0041029	TM4SF20	transmembrane 4 L six family member 20	79853
ENSG00000268686	1.62	1.18	0.342922	3.57868	0.000345332	0.00254168	LOC101928295	uncharacterized LOC101928295	101928295
ENSG00000177508	197.82	1.17	0.317029	3.69986	0.00021572	0.00176736	IRX3	iroquois homeobox 3	79191
ENSG00000137486	54.65	1.17	0.288926	4.03829	5.38e-05	0.000608516	ARRB1	arrestin beta 1	408
ENSG00000167617	51.32	1.17	0.262718	4.43511	9.2e-06	0.000156664	CDC42EP5	CDC42 effector protein 5	148170
ENSG00000141052	26.32	1.17	0.347131	3.53599	0.000406247	0.00290021	MYOCD	myocardin	93649
ENSG00000095203	22.25	1.17	0.269193	1.54182	0.123119	0.238124	EPB41L4B	erythrocyte membrane protein band 4.1 like 4B	54566
ENSG00000149781	21.39	1.17	0.248412	4.7135	2.43e-06	5.5e-05	FERMT3	FERM domain containing kindlin 3	83706
ENSG00000130203	7.82	1.17	0.333033	3.51578	0.000438472	0.00306215	APOE	apolipoprotein E	348
ENSG00000230438	7.29	1.17	0.336639	3.47094	0.000518647	0.00347824	NA	NA	NA
ENSG00000272872	7.22	1.17	0.334936	3.48648	0.000489415	0.00331802	NA	NA	NA
ENSG00000076864	6.66	1.17	0.331852	3.51684	0.000436719	0.00305323	RAP1GAP	RAP1 GTPase activating protein	5909
ENSG00000108556	6.47	1.17	0.322176	3.61112	0.000304881	0.0023111	CHRNE	cholinergic receptor nicotinic epsilon subunit	1145
ENSG00000204174	5.46	1.17	0.339357	3.44364	0.000573942	0.00376259	NPY4R	neuropeptide Y receptor Y4	5540
ENSG00000149506	4.42	1.17	0.341248	3.4055	0.000660422	0.00420356	ZP1	zona pellucida glycoprotein 1	22917
ENSG00000171385	3.05	1.17	0.345665	2.07558	0.0379331	0.0965699	KCND3	potassium voltage-gated channel subfamily D member 3	3752
ENSG00000110245	1.33	1.17	0.323232	3.68871	0.000225394	0.00183044	APOC3	apolipoprotein C3	345
ENSG00000255866	1.02	1.17	0.34491	3.39439	0.000687819	0.0043307	NA	NA	NA
ENSG00000088367	575.43	1.16	0.215271	5.39387	6.9e-08	3.05e-06	EPB41L1	erythrocyte membrane protein band 4.1 like 1	2036
ENSG00000107738	210.07	1.16	0.253064	4.58763	4.48e-06	8.91e-05	VSIR	V-set immunoregulatory receptor	64115
ENSG00000069122	169.97	1.16	0.318347	6.73744	1.61e-11	2.98e-09	ADGRF5	adhesion G protein-coupled receptor F5	221395
ENSG00000248187	151.66	1.16	0.207631	5.60109	2.13e-08	1.14e-06	NA	NA	NA
ENSG00000162882	2.9	1.16	0.346281	3.32983	0.000868996	0.00515772	HAAO	3-hydroxyanthranilate 3,4-dioxygenase	23498
ENSG00000230918	2.8	1.16	0.347057	1.45809	0.144816	0.268828	DPP4-DT	DPP4 divergent transcript	100131604
ENSG00000169862	2.76	1.16	0.329748	4.02551	5.69e-05	0.000634565	CTNND2	catenin delta 2	1501
ENSG00000102359	1086.03	1.15	0.185575	6.22232	4.9e-10	5.04e-08	SRPX2	sushi repeat containing protein X-linked 2	27286
ENSG00000084628	10.48	1.15	0.340311	3.40856	0.000653055	0.00416355	NKAIN1	sodium/potassium transporting ATPase interacting 1	79570
ENSG00000196557	7.82	1.15	0.3175	4.80479	1.55e-06	3.87e-05	CACNA1H	calcium voltage-gated channel subunit alpha1 H	8912
ENSG00000005108	5.15	1.15	0.347098	3.41306	0.000642377	0.00410314	THSD7A	thrombospondin type 1 domain containing 7A	221981
ENSG00000084734	3.78	1.15	0.318078	3.54816	0.00038793	0.00279432	GCKR	glucokinase regulator	2646
ENSG00000143839	1.69	1.15	0.325748	3.78587	0.00015317	0.00136534	REN	renin	5972
ENSG00000163995	1.55	1.15	0.321709	0.928443	0.353178	0.511631	ABLIM2	actin binding LIM protein family member 2	84448
ENSG00000225670	1.43	1.15	0.347369	3.23095	0.00123378	0.00679107	NA	NA	NA
ENSG00000157060	0.96	1.15	0.34617	3.37192	0.000746461	0.00459181	SHCBP1L	SHC binding and spindle associated 1 like	81626
ENSG00000131386	700.14	1.14	0.307963	3.72986	0.000191588	0.0016172	GALNT15	polypeptide N-acetylgalactosaminyltransferase 15	117248
ENSG00000197614	626.77	1.14	0.324539	4.8043	1.55e-06	3.87e-05	MFAP5	microfibril associated protein 5	8076
ENSG00000223764	130.52	1.14	0.224582	5.08976	3.59e-07	1.2e-05	LINC02593	long intergenic non-protein coding RNA 2593	100130417
ENSG00000111913	95.4	1.14	0.3319	3.44768	0.000565426	0.00371814	RIPOR2	RHO family interacting cell polarization regulator 2	9750
ENSG00000056998	49.82	1.14	0.233484	4.89191	9.99e-07	2.73e-05	GYG2	glycogenin 2	8908
ENSG00000103522	38.94	1.14	0.329917	3.48956	0.000483816	0.00329049	IL21R	interleukin 21 receptor	50615
ENSG00000173200	15.49	1.14	0.283049	4.0108	6.05e-05	0.000668148	PARP15	poly(ADP-ribose) polymerase family member 15	165631
ENSG00000165899	13	1.14	0.294952	3.84059	0.000122739	0.00115504	OTOGL	otogelin like	283310
ENSG00000250305	12.98	1.14	0.300387	3.77295	0.00016133	0.00141968	TRMT9B	tRNA methyltransferase 9B (putative)	57604
ENSG00000027869	12.14	1.14	0.303351	3.74829	0.000178047	0.00152972	SH2D2A	SH2 domain containing 2A	9047
ENSG00000161835	11.22	1.14	0.233798	4.8459	1.26e-06	3.31e-05	TAMALIN	trafficking regulator and scaffold protein tamalin	160622
ENSG00000227028	10.8	1.14	0.307935	3.71185	0.000205749	0.00170607	SLC8A1-AS1	SLC8A1 antisense RNA 1	100128590
ENSG00000107099	9.27	1.14	0.34617	3.3297	0.000869404	0.00515855	DOCK8	dedicator of cytokinesis 8	81704
ENSG00000240583	7.59	1.14	0.347127	3.35494	0.000793818	0.00482455	AQP1	aquaporin 1 (Colton blood group)	358
ENSG00000255270	5.14	1.14	0.315533	3.58451	0.000337711	0.00249512	NA	NA	NA
ENSG00000272692	2.61	1.14	0.327594	3.38198	0.00071966	0.00448135	NA	NA	NA
ENSG00000142233	1.48	1.14	0.342849	3.15407	0.00161011	0.0083336	NTN5	netrin 5	126147
ENSG00000023171	192.57	1.13	0.343718	3.34636	0.000818787	0.00493734	GRAMD1B	GRAM domain containing 1B	57476
ENSG00000115844	37.15	1.13	0.273211	4.1431	3.43e-05	0.000432604	DLX2	distal-less homeobox 2	1746
ENSG00000168243	19.19	1.13	0.258084	4.35571	1.33e-05	0.000206939	GNG4	G protein subunit gamma 4	2786
ENSG00000106560	4.14	1.13	0.343069	3.28298	0.00102715	0.0058807	GIMAP2	GTPase, IMAP family member 2	26157
ENSG00000012124	2.69	1.13	0.324195	3.39036	0.000698016	0.00437915	CD22	CD22 molecule	933
ENSG00000228741	2.3	1.13	0.34191	3.2217	0.00127432	0.00695655	SPATA13	spermatogenesis associated 13	221178
ENSG00000167178	1.98	1.13	0.34589	3.258	0.00112201	0.00631303	ISLR2	immunoglobulin superfamily containing leucine rich repeat 2	57611
ENSG00000206384	1.95	1.13	0.337231	3.5917	0.000328535	0.00244727	COL6A6	collagen type VI alpha 6 chain	131873
ENSG00000231465	1.79	1.13	0.347453	3.16017	0.00157677	0.00818526	NA	NA	NA
ENSG00000238273	1.55	1.13	0.345084	3.11277	0.0018534	0.00929062	NA	NA	NA
ENSG00000124019	0.78	1.13	0.331326	3.32554	0.000882462	0.00521354	FAM124B	family with sequence similarity 124 member B	79843
ENSG00000154122	1509.88	1.12	0.203405	5.48288	4.18e-08	2.02e-06	ANKH	ANKH inorganic pyrophosphate transport regulator	56172
ENSG00000162496	127.11	1.12	0.274449	4.08389	4.43e-05	0.000528646	DHRS3	dehydrogenase/reductase 3	9249
ENSG00000103034	86.64	1.12	0.243054	4.59485	4.33e-06	8.66e-05	NDRG4	NDRG family member 4	65009
ENSG00000112852	11.63	1.12	0.328264	3.40488	0.000661928	0.00420897	PCDHB2	protocadherin beta 2	56133
ENSG00000134256	4.69	1.12	0.319001	3.478	0.000505174	0.00340449	CD101	CD101 molecule	9398
ENSG00000268873	4.45	1.12	0.347445	3.28477	0.00102066	0.00585919	NA	NA	NA
ENSG00000005513	3.48	1.12	0.33792	3.27899	0.00104178	0.00594325	SOX8	SRY-box transcription factor 8	30812
ENSG00000101463	2.6	1.12	0.340044	3.42287	0.00061963	0.00398475	SYNDIG1	synapse differentiation inducing 1	79953
ENSG00000135298	2.1	1.12	0.347086	3.17402	0.00150345	0.00787335	ADGRB3	adhesion G protein-coupled receptor B3	577
ENSG00000198768	1393.42	1.11	0.265824	4.18309	2.88e-05	0.000376405	APCDD1L	APC down-regulated 1 like	164284
ENSG00000205978	273.95	1.11	0.233597	4.76896	1.85e-06	4.46e-05	NYNRIN	NYN domain and retroviral integrase containing	57523
ENSG00000196839	146.86	1.11	0.200574	5.55282	2.81e-08	1.44e-06	ADA	adenosine deaminase	100
ENSG00000130720	34.62	1.11	0.344057	3.26082	0.00111092	0.00626239	FIBCD1	fibrinogen C domain containing 1	84929
ENSG00000171533	33.2	1.11	0.288696	3.84368	0.000121204	0.00114396	MAP6	microtubule associated protein 6	4135
ENSG00000132321	14.38	1.11	0.328994	3.3861	0.000708941	0.00443324	IQCA1	IQ motif containing with AAA domain 1	79781
ENSG00000118407	11.07	1.11	0.326979	3.413	0.000642515	0.00410314	FILIP1	filamin A interacting protein 1	27145
ENSG00000174611	8.81	1.11	0.332229	3.34588	0.000820203	0.00494123	KY	kyphoscoliosis peptidase	339855
ENSG00000114638	4.79	1.11	0.326722	2.06203	0.0392052	0.0990106	UPK1B	uroplakin 1B	7348
ENSG00000237484	4.61	1.11	0.332891	3.31575	0.000913961	0.00536016	LINC01684	long intergenic non-protein coding RNA 1684	105372751
ENSG00000259353	3.95	1.11	0.328663	3.3392	0.000840206	0.0050218	NA	NA	NA
ENSG00000247311	3.16	1.11	0.346019	3.19244	0.00141074	0.00749724	NA	NA	NA
ENSG00000223652	2.08	1.11	0.34394	3.15426	0.00160906	0.00833044	NA	NA	NA
ENSG00000104415	990.65	1.1	0.2839	3.89137	9.97e-05	0.000982707	CCN4	cellular communication network factor 4	8840
ENSG00000132357	484.92	1.1	0.194171	5.65616	1.55e-08	8.87e-07	CARD6	caspase recruitment domain family member 6	84674
ENSG00000125845	268.82	1.1	0.341578	3.27175	0.00106882	0.00606696	BMP2	bone morphogenetic protein 2	650
ENSG00000173705	112.42	1.1	0.271016	4.05966	4.91e-05	0.000570973	SUSD5	sushi domain containing 5	26032
ENSG00000152284	85.58	1.1	0.314039	3.50937	0.000449174	0.00311542	TCF7L1	transcription factor 7 like 1	83439
ENSG00000183775	73.63	1.1	0.295811	3.72316	0.000196742	0.00165186	KCTD16	potassium channel tetramerization domain containing 16	57528
ENSG00000158050	51.58	1.1	0.271222	4.06491	4.81e-05	0.000561398	DUSP2	dual specificity phosphatase 2	1844
ENSG00000105605	46.08	1.1	0.262212	4.17687	2.96e-05	0.000383379	CACNG7	calcium voltage-gated channel auxiliary subunit gamma 7	59284
ENSG00000266680	17.49	1.1	0.232018	4.71383	2.43e-06	5.5e-05	NA	NA	NA
ENSG00000169583	13.14	1.1	0.261968	4.18914	2.8e-05	0.000368147	CLIC3	chloride intracellular channel 3	9022
ENSG00000167641	10.57	1.1	0.330041	2.97639	0.00291668	0.0132416	PPP1R14A	protein phosphatase 1 regulatory inhibitor subunit 14A	94274
ENSG00000236039	6.3	1.1	0.335741	3.27814	0.00104493	0.00595944	LINC02889	long intergenic non-protein coding RNA 2889	101927630
ENSG00000073734	2.76	1.1	0.347419	3.15744	0.00159161	0.0082534	ABCB11	ATP binding cassette subfamily B member 11	8647
ENSG00000239282	2.68	1.1	0.326844	3.28621	0.00101546	0.00583459	CASTOR1	cytosolic arginine sensor for mTORC1 subunit 1	652968
ENSG00000224116	2.48	1.1	0.323637	3.30452	0.000951402	0.00553255	INHBA-AS1	INHBA antisense RNA 1	285954
ENSG00000115415	5729.34	1.09	0.201814	5.40787	6.38e-08	2.88e-06	STAT1	signal transducer and activator of transcription 1	6772
ENSG00000259207	474.28	1.09	0.231742	4.70172	2.58e-06	5.76e-05	ITGB3	integrin subunit beta 3	3690
ENSG00000152049	309.98	1.09	0.276773	3.95258	7.73e-05	0.000809004	KCNE4	potassium voltage-gated channel subfamily E regulatory subunit 4	23704
ENSG00000027075	128.64	1.09	0.203486	5.36984	7.88e-08	3.37e-06	PRKCH	protein kinase C eta	5583
ENSG00000121316	114.12	1.09	0.243555	4.47535	7.63e-06	0.000135002	PLBD1	phospholipase B domain containing 1	79887
ENSG00000134769	87.98	1.09	0.286715	3.80621	0.000141115	0.00128769	DTNA	dystrobrevin alpha	1837
ENSG00000105290	58.46	1.09	0.178969	6.1126	9.8e-10	9e-08	APLP1	amyloid beta precursor like protein 1	333
ENSG00000203876	6.23	1.09	0.319738	3.38217	0.000719163	0.00448078	ADD3-AS1	ADD3 antisense RNA 1	100505933
ENSG00000150722	3.8	1.09	0.323944	3.33018	0.000867915	0.00515289	PPP1R1C	protein phosphatase 1 regulatory inhibitor subunit 1C	151242
ENSG00000269976	2.6	1.09	0.330759	3.22523	0.00125873	0.00688706	NA	NA	NA
ENSG00000135862	23986.1	1.08	0.178178	6.08709	1.15e-09	1.02e-07	LAMC1	laminin subunit gamma 1	3915
ENSG00000124875	1312.1	1.08	0.328425	3.32077	0.000897696	0.00528732	CXCL6	C-X-C motif chemokine ligand 6	6372
ENSG00000100344	295.3	1.08	0.231741	4.65661	3.21e-06	6.85e-05	PNPLA3	patatin like phospholipase domain containing 3	80339
ENSG00000054793	284.53	1.08	0.208884	5.175	2.28e-07	8.34e-06	ATP9A	ATPase phospholipid transporting 9A (putative)	10079
ENSG00000176641	244.93	1.08	0.258606	4.19707	2.7e-05	0.000359537	RNF152	ring finger protein 152	220441
ENSG00000156299	227.98	1.08	0.296258	3.66786	0.000244585	0.00195707	TIAM1	TIAM Rac1 associated GEF 1	7074
ENSG00000157551	148.82	1.08	0.253903	4.24337	2.2e-05	0.000304565	KCNJ15	potassium inwardly rectifying channel subfamily J member 15	3772
ENSG00000108187	106.89	1.08	0.197547	5.45119	5e-08	2.35e-06	PBLD	phenazine biosynthesis like protein domain containing	64081
ENSG00000127415	68.44	1.08	0.224789	4.80663	1.53e-06	3.85e-05	IDUA	alpha-L-iduronidase	3425
ENSG00000235609	64.34	1.08	0.217536	4.98339	6.25e-07	1.89e-05	NA	NA	NA
ENSG00000111199	53.03	1.08	0.208848	5.17127	2.33e-07	8.43e-06	TRPV4	transient receptor potential cation channel subfamily V member 4	59341
ENSG00000173432	47.22	1.08	0.33417	3.27026	0.0010745	0.00609197	SAA1	serum amyloid A1	6288
ENSG00000203780	20.28	1.08	0.294322	3.681	0.000232322	0.00187789	FANK1	fibronectin type III and ankyrin repeat domains 1	92565
ENSG00000181634	19.96	1.08	0.319397	4.72944	2.25e-06	5.2e-05	TNFSF15	TNF superfamily member 15	9966
ENSG00000204588	7.22	1.08	0.323872	3.3352	0.000852384	0.00507601	LINC01123	long intergenic non-protein coding RNA 1123	440894
ENSG00000163145	2.93	1.08	0.345005	3.10902	0.00187707	0.00937515	C1QTNF7	C1q and TNF related 7	114905
ENSG00000250986	2.89	1.08	0.322986	2.61444	0.00893742	0.0317669	NA	NA	NA
ENSG00000105880	2.5	1.08	0.336635	3.41962	0.000627096	0.00402336	DLX5	distal-less homeobox 5	1749
ENSG00000185640	1.83	1.08	0.347419	3.06636	0.00216683	0.0105514	KRT79	keratin 79	338785
ENSG00000269640	1.51	1.08	0.323502	3.56312	0.000366476	0.00266394	NA	NA	NA
ENSG00000253163	1.45	1.08	0.32345	3.52552	0.000422645	0.00298203	NA	NA	NA
ENSG00000240386	1.21	1.08	0.34678	3.14416	0.00166562	0.00856795	LCE1F	late cornified envelope 1F	353137
ENSG00000164176	671.37	1.07	0.346523	3.16943	0.00152736	0.00798476	EDIL3	EGF like repeats and discoidin domains 3	10085
ENSG00000076716	86.16	1.07	0.315318	3.40176	0.000669531	0.0042379	GPC4	glypican 4	2239
ENSG00000173698	46.53	1.07	0.277602	3.8674	0.000110003	0.00106165	ADGRG2	adhesion G protein-coupled receptor G2	10149
ENSG00000121895	43.86	1.07	0.224309	4.75295	2e-06	4.75e-05	TMEM156	transmembrane protein 156	80008
ENSG00000167100	38.37	1.07	0.225216	4.72582	2.29e-06	5.27e-05	SAMD14	sterile alpha motif domain containing 14	201191
ENSG00000241679	13.48	1.07	0.286888	3.73682	0.000186364	0.00158003	NA	NA	NA
ENSG00000163083	11.07	1.07	0.338252	3.17592	0.00149362	0.00783979	INHBB	inhibin subunit beta B	3625
ENSG00000267397	10.15	1.07	0.31452	3.38961	0.000699928	0.00438737	NA	NA	NA
ENSG00000185477	5.77	1.07	0.333581	3.18444	0.00145035	0.00766329	GPRIN3	GPRIN family member 3	285513
ENSG00000163898	3.97	1.07	0.344198	3.10647	0.00189334	0.0094466	LIPH	lipase H	200879
ENSG00000227517	2.84	1.07	0.344065	3.18631	0.00144099	0.00763285	LINC01483	long intergenic non-protein coding RNA 1483	101928122
ENSG00000172061	85.11	1.06	0.346927	3.18629	0.00144109	0.00763285	LRRC15	leucine rich repeat containing 15	131578
ENSG00000101460	52	1.06	0.186751	5.67696	1.37e-08	8e-07	MAP1LC3A	microtubule associated protein 1 light chain 3 alpha	84557
ENSG00000158473	27.22	1.06	0.328286	3.23995	0.00119552	0.00662785	CD1D	CD1d molecule	912
ENSG00000173727	24.03	1.06	0.196155	5.38997	7.05e-08	3.08e-06	NA	NA	NA
ENSG00000254245	13.43	1.06	0.264892	3.98218	6.83e-05	0.000732868	PCDHGA3	protocadherin gamma subfamily A, 3	56112
ENSG00000259450	9.93	1.06	0.323395	3.27705	0.001049	0.00597732	NA	NA	NA
ENSG00000175356	8.92	1.06	0.289404	3.63219	0.000281027	0.00217024	SCUBE2	signal peptide, CUB domain and EGF like domain containing 2	57758
ENSG00000139597	5.53	1.06	0.298491	3.50573	0.000455358	0.00314246	N4BP2L1	NEDD4 binding protein 2 like 1	90634
ENSG00000273174	4.67	1.06	0.315134	3.33749	0.000845382	0.00504244	NA	NA	NA
ENSG00000131398	4.26	1.06	0.30877	3.39342	0.000690257	0.00434179	KCNC3	potassium voltage-gated channel subfamily C member 3	3748
ENSG00000138670	3.61	1.06	0.345788	3.12845	0.00175733	0.00889943	RASGEF1B	RasGEF domain family member 1B	153020
ENSG00000235033	3.61	1.06	0.336901	3.12485	0.00177898	0.00899753	DAAM2-AS1	DAAM2 antisense RNA 1	100505635
ENSG00000186765	3	1.06	0.34108	3.05959	0.00221636	0.0107108	FSCN2	fascin actin-bundling protein 2, retinal	25794
ENSG00000007264	2.02	1.06	0.347451	3.00101	0.0026909	0.0124233	MATK	megakaryocyte-associated tyrosine kinase	4145
ENSG00000224081	1.92	1.06	0.346764	3.00091	0.00269173	0.0124233	SLC44A3-AS1	SLC44A3 antisense RNA 1	101928079
ENSG00000255098	1.57	1.06	0.336952	3.29889	0.000970662	0.00562925	NA	NA	NA
ENSG00000133800	0.99	1.06	0.310979	2.70806	0.00676771	0.0256003	LYVE1	lymphatic vessel endothelial hyaluronan receptor 1	10894
ENSG00000111245	0.7	1.06	0.33823	3.09458	0.00197092	0.00974279	MYL2	myosin light chain 2	4633
ENSG00000113739	6426.39	1.05	0.283933	3.70835	0.000208616	0.00172687	STC2	stanniocalcin 2	8614
ENSG00000169429	3169.08	1.05	0.285244	3.68947	0.000224718	0.00182639	CXCL8	C-X-C motif chemokine ligand 8	3576
ENSG00000173482	1352.69	1.05	0.171437	6.09581	1.09e-09	9.84e-08	PTPRM	protein tyrosine phosphatase receptor type M	5797
ENSG00000171604	565.9	1.05	0.178549	5.901	3.61e-09	2.66e-07	CXXC5	CXXC finger protein 5	51523
ENSG00000109743	91.2	1.05	0.301602	3.50206	0.000461673	0.00317579	BST1	bone marrow stromal cell antigen 1	683
ENSG00000261295	75.69	1.05	0.211705	4.97449	6.54e-07	1.95e-05	NA	NA	NA
ENSG00000197405	22.37	1.05	0.238497	4.39747	1.1e-05	0.000178297	C5AR1	complement C5a receptor 1	728
ENSG00000205593	15.05	1.05	0.275575	3.80232	0.000143347	0.00130311	DENND6B	DENN domain containing 6B	414918
ENSG00000267325	13.45	1.05	0.30054	3.50233	0.000461215	0.00317491	NA	NA	NA
ENSG00000187479	5.77	1.05	0.346936	3.11098	0.00186469	0.00933026	C11orf96	chromosome 11 open reading frame 96	387763
ENSG00000188501	3.74	1.05	0.324428	3.18152	0.00146506	0.00772616	LCTL	lactase like	197021
ENSG00000165495	3.04	1.05	0.339164	3.25009	0.00115369	0.0064498	PKNOX2	PBX/knotted 1 homeobox 2	63876
ENSG00000267918	2.21	1.05	0.343386	3.0046	0.00265934	0.0123096	NA	NA	NA
ENSG00000229694	1.79	1.05	0.34737	2.95278	0.00314923	0.0140392	LINC00484	long intergenic non-protein coding RNA 484	100129347
ENSG00000198829	1.48	1.05	0.333939	3.34612	0.000819495	0.00493851	SUCNR1	succinate receptor 1	56670
ENSG00000239590	1.02	1.05	0.334003	3.16792	0.00153533	0.00801333	OR1J4	olfactory receptor family 1 subfamily J member 4	26219
ENSG00000267586	1	1.05	0.333979	3.15443	0.00160809	0.00832988	LINC00907	long intergenic non-protein coding RNA 907	284260
ENSG00000148848	3381.57	1.04	0.23389	4.42893	9.47e-06	0.000160369	ADAM12	ADAM metallopeptidase domain 12	8038
ENSG00000147408	967.25	1.04	0.299256	3.48879	0.00048521	0.00329881	CSGALNACT1	chondroitin sulfate N-acetylgalactosaminyltransferase 1	55790
ENSG00000125538	153.74	1.04	0.345571	3.16728	0.00153872	0.00802672	IL1B	interleukin 1 beta	3553
ENSG00000101542	149.52	1.04	0.315452	3.31989	0.000900523	0.00530073	CDH20	cadherin 20	28316
ENSG00000143416	126.44	1.04	0.278138	3.75137	0.000175869	0.00151507	SELENBP1	selenium binding protein 1	8991
ENSG00000187608	86.52	1.04	0.202338	5.16245	2.44e-07	8.74e-06	ISG15	ISG15 ubiquitin like modifier	9636
ENSG00000156414	36.92	1.04	0.305822	3.4217	0.000622312	0.003998	TDRD9	tudor domain containing 9	122402
ENSG00000129295	30.08	1.04	0.261003	3.97679	6.99e-05	0.000745551	DNAAF11	dynein axonemal assembly factor 11	23639
ENSG00000154856	26.14	1.04	0.321893	4.17242	3.01e-05	0.000389446	APCDD1	APC down-regulated 1	147495
ENSG00000260400	21.65	1.04	0.264585	3.93436	8.34e-05	0.000857537	NA	NA	NA
ENSG00000237499	17.49	1.04	0.296443	3.50921	0.00044944	0.00311592	WAKMAR2	wound and keratinocyte migration associated lncRNA 2	100130476
ENSG00000110675	10.81	1.04	0.287846	3.61781	0.000297105	0.00226912	ELMOD1	ELMO domain containing 1	55531
ENSG00000100031	8.01	1.04	0.272932	3.79404	0.000148215	0.00133461	GGT1	gamma-glutamyltransferase 1	2678
ENSG00000154864	4.66	1.04	0.344697	3.0204	0.00252444	0.0118463	PIEZO2	piezo type mechanosensitive ion channel component 2	63895
ENSG00000110799	2.93	1.04	0.347417	2.99085	0.00278197	0.0127483	VWF	von Willebrand factor	7450
ENSG00000135346	1.36	1.04	0.339105	3.16911	0.00152906	0.007989	CGA	glycoprotein hormones, alpha polypeptide	1081
ENSG00000235813	0.93	1.04	0.341877	3.05545	0.0022472	0.010798	NA	NA	NA
ENSG00000087303	6868.16	1.03	0.191108	5.39453	6.87e-08	3.05e-06	NID2	nidogen 2	22795
ENSG00000114423	955.02	1.03	0.151503	6.77416	1.25e-11	2.39e-09	CBLB	Cbl proto-oncogene B	868
ENSG00000112902	642.35	1.03	0.324085	3.19476	0.00139945	0.00745364	SEMA5A	semaphorin 5A	9037
ENSG00000006534	306.74	1.03	0.211804	4.86191	1.16e-06	3.1e-05	ALDH3B1	aldehyde dehydrogenase 3 family member B1	221
ENSG00000205213	159.74	1.03	0.239926	4.31424	1.6e-05	0.000238483	LGR4	leucine rich repeat containing G protein-coupled receptor 4	55366
ENSG00000123191	140.19	1.03	0.213595	4.83798	1.31e-06	3.42e-05	ATP7B	ATPase copper transporting beta	540
ENSG00000090238	100.92	1.03	0.254849	4.03428	5.48e-05	0.000616693	YPEL3	yippee like 3	83719
ENSG00000154035	54.9	1.03	0.237763	4.34992	1.36e-05	0.000211801	NA	NA	NA
ENSG00000126218	20.04	1.03	0.310194	3.32786	0.000875146	0.00517985	F10	coagulation factor X	2159
ENSG00000173762	15.58	1.03	0.338873	3.06972	0.00214258	0.0104518	CD7	CD7 molecule	924
ENSG00000006283	12.31	1.03	0.308953	3.34568	0.000820799	0.00494173	CACNA1G	calcium voltage-gated channel subunit alpha1 G	8913
ENSG00000116035	11.9	1.03	0.25223	4.07931	4.52e-05	0.00053553	VAX2	ventral anterior homeobox 2	25806
ENSG00000166317	10.66	1.03	0.335997	3.08057	0.00206606	0.0101312	SYNPO2L	synaptopodin 2 like	79933
ENSG00000268743	2.71	1.03	0.31508	3.1934	0.00140606	0.00747713	NA	NA	NA
ENSG00000255408	1.51	1.03	0.347317	2.90821	0.00363503	0.0157668	PCDHA3	protocadherin alpha 3	56145
ENSG00000225166	1.46	1.03	0.347454	2.90286	0.00369772	0.0159704	LOC102724849	uncharacterized LOC102724849	102724849
ENSG00000227292	1.27	1.03	0.327946	2.30633	0.0210921	0.0618122	NA	NA	NA
ENSG00000260943	0.69	1.03	0.343541	2.98643	0.00282256	0.0128995	NA	NA	NA
ENSG00000011465	16114.3	1.02	0.220214	4.623	3.78e-06	7.76e-05	DCN	decorin	1634
ENSG00000116962	8818.15	1.02	0.162472	6.30887	2.81e-10	3.16e-08	NID1	nidogen 1	4811
ENSG00000198682	5653.53	1.02	0.168517	6.05077	1.44e-09	1.2e-07	PAPSS2	3'-phosphoadenosine 5'-phosphosulfate synthase 2	9060
ENSG00000167123	1320.12	1.02	0.15387	6.62381	3.5e-11	5.76e-09	CERCAM	cerebral endothelial cell adhesion molecule	51148
ENSG00000125170	518.07	1.02	0.195469	5.22713	1.72e-07	6.47e-06	DOK4	docking protein 4	55715
ENSG00000172379	241.7	1.02	0.259175	3.94762	7.89e-05	0.000819719	ARNT2	aryl hydrocarbon receptor nuclear translocator 2	9915
ENSG00000256043	144.8	1.02	0.175973	5.80295	6.52e-09	4.4e-07	CTSO	cathepsin O	1519
ENSG00000180340	72.39	1.02	0.271266	3.74766	0.000178495	0.00153279	FZD2	frizzled class receptor 2	2535
ENSG00000227036	71.85	1.02	0.238608	4.264	2.01e-05	0.000284069	LINC00511	long intergenic non-protein coding RNA 511	400619
ENSG00000095539	28.38	1.02	0.208248	4.89493	9.83e-07	2.7e-05	SEMA4G	semaphorin 4G	57715
ENSG00000157445	12.73	1.02	0.297014	3.41703	0.000633094	0.00405509	CACNA2D3	calcium voltage-gated channel auxiliary subunit alpha2delta 3	55799
ENSG00000225383	5.39	1.02	0.344045	2.98571	0.00282923	0.0129208	SFTA1P	surfactant associated 1, lncRNA	207107
ENSG00000233521	4.19	1.02	0.339098	3.01098	0.00260404	0.0121165	LINC01638	long intergenic non-protein coding RNA 1638	105372978
ENSG00000236393	3.61	1.02	0.345259	2.93514	0.00333394	0.0146959	LOC101927476	uncharacterized LOC101927476	101927476
ENSG00000107317	2.82	1.02	0.330691	3.41389	0.000640426	0.00409388	PTGDS	prostaglandin D2 synthase	5730
ENSG00000162654	2.33	1.02	0.331556	3.40255	0.00066761	0.00423252	GBP4	guanylate binding protein 4	115361
ENSG00000174792	2.13	1.02	0.346965	2.91966	0.0035041	0.0153023	ODAPH	odontogenesis associated phosphoprotein	152816
ENSG00000137959	864.96	1.01	0.213636	4.716	2.41e-06	5.49e-05	IFI44L	interferon induced protein 44 like	10964
ENSG00000132793	516.18	1.01	0.166067	6.09387	1.1e-09	9.92e-08	LPIN3	lipin 3	64900
ENSG00000157680	451.75	1.01	0.206332	4.88871	1.02e-06	2.75e-05	DGKI	diacylglycerol kinase iota	9162
ENSG00000114315	119.04	1.01	0.266107	3.81307	0.000137253	0.00125782	HES1	hes family bHLH transcription factor 1	3280
ENSG00000137834	101.54	1.01	0.238933	4.22309	2.41e-05	0.000326741	SMAD6	SMAD family member 6	4091
ENSG00000224259	77.96	1.01	0.338504	3.01016	0.00261107	0.0121459	LINC01133	long intergenic non-protein coding RNA 1133	100505633
ENSG00000259721	27.53	1.01	0.250549	4.04735	5.18e-05	0.000593314	GREM1-AS1	GREM1 antisense RNA 1	100131315
ENSG00000158315	25	1.01	0.236567	4.27892	1.88e-05	0.000270051	RHBDL2	rhomboid like 2	54933
ENSG00000104043	23.6	1.01	0.232361	4.32041	1.56e-05	0.000233898	ATP8B4	ATPase phospholipid transporting 8B4 (putative)	79895
ENSG00000272168	22.3	1.01	0.202491	4.95231	7.33e-07	2.14e-05	NA	NA	NA
ENSG00000185860	16.23	1.01	0.287267	3.49556	0.000473067	0.00323568	CCDC190	coiled-coil domain containing 190	339512
ENSG00000257671	6.29	1.01	0.333919	3.03573	0.00239956	0.0113926	KRT7-AS	KRT7 antisense RNA 1	109729127
ENSG00000186453	3.98	1.01	0.339483	3.13479	0.00171975	0.00877143	FAM228A	family with sequence similarity 228 member A	653140
ENSG00000237070	1.7	1.01	0.322758	3.43926	0.000583297	0.00381076	LOC105375166	uncharacterized LOC105375166	105375166
ENSG00000168675	1.46	1.01	0.344423	2.93688	0.00331529	0.0146204	LDLRAD4	low density lipoprotein receptor class A domain containing 4	753
ENSG00000138615	0.9	1.01	0.341615	2.97693	0.00291155	0.0132214	CILP	cartilage intermediate layer protein	8483
ENSG00000055118	0.62	1.01	0.339641	2.95539	0.00312274	NA	KCNH2	potassium voltage-gated channel subfamily H member 2	3757
ENSG00000154734	6701.54	1	0.259033	3.84936	0.000118429	0.00112437	ADAMTS1	ADAM metallopeptidase with thrombospondin type 1 motif 1	9510
ENSG00000128342	411.68	1	0.306257	3.27966	0.00103931	0.00593091	LIF	LIF interleukin 6 family cytokine	3976
ENSG00000130529	267.75	1	0.161756	6.17595	6.58e-10	6.36e-08	TRPM4	transient receptor potential cation channel subfamily M member 4	54795
ENSG00000104324	154.75	1	0.182751	5.47196	4.45e-08	2.14e-06	CPQ	carboxypeptidase Q	10404
ENSG00000170801	153.8	1	0.278599	3.59269	0.000327283	0.00244244	HTRA3	HtrA serine peptidase 3	94031
ENSG00000139971	98.69	1	0.26823	3.72836	0.000192729	0.0016247	ARMH4	armadillo like helical domain containing 4	145407
ENSG00000162849	91.45	1	0.280446	3.57342	0.000352352	0.00258052	KIF26B	kinesin family member 26B	55083
ENSG00000026297	53.26	1	0.237494	4.19227	2.76e-05	0.000363832	RNASET2	ribonuclease T2	8635
ENSG00000154493	44.77	1	0.260027	3.84258	0.000121749	0.00114854	C10orf90	chromosome 10 open reading frame 90	118611
ENSG00000110347	32.58	1	0.340228	2.97206	0.00295813	0.0133796	NA	NA	NA
ENSG00000250064	26.32	1	0.262609	3.80209	0.00014348	0.00130371	NA	NA	NA
ENSG00000179397	10.75	1	0.264881	3.75739	0.000171694	0.00148642	CATSPERE	catsper channel auxiliary subunit epsilon	257044
ENSG00000169302	9.56	1	0.294406	3.3967	0.000682037	0.00429851	STK32A	serine/threonine kinase 32A	202374
ENSG00000177294	5.39	1	0.34593	2.89811	0.00375414	0.0161489	FBXO39	F-box protein 39	162517
ENSG00000162490	4.68	1	0.345268	2.90661	0.00365367	0.015837	DRAXIN	dorsal inhibitory axon guidance protein	374946
ENSG00000113209	3.67	1	0.333567	2.98347	0.00284995	0.0129815	PCDHB5	protocadherin beta 5	26167
ENSG00000157404	2.06	1	0.318615	2.81477	0.00488125	0.0198553	KIT	KIT proto-oncogene, receptor tyrosine kinase	3815
ENSG00000237234	1.93	1	0.345351	2.82277	0.00476108	0.0194835	NA	NA	NA
ENSG00000235191	1.82	1	0.340433	2.86216	0.00420767	0.0176502	NUCB1-AS1	NUCB1 antisense RNA 1	100874085
ENSG00000127928	0.88	1	0.342998	2.95971	0.00307929	0.0137784	GNGT1	G protein subunit gamma transducin 1	2792
ENSG00000164692	95122.7	0.99	0.209185	4.75309	2e-06	4.75e-05	COL1A2	collagen type I alpha 2 chain	1278
ENSG00000008394	4699.24	0.99	0.246625	3.99836	6.38e-05	0.000695794	MGST1	microsomal glutathione S-transferase 1	4257
ENSG00000143878	1759.56	0.99	0.197465	5.00756	5.51e-07	1.69e-05	RHOB	ras homolog family member B	388
ENSG00000173221	1383.6	0.99	0.155587	6.37257	1.86e-10	2.21e-08	GLRX	glutaredoxin	2745
ENSG00000102287	552.86	0.99	0.207255	4.75787	1.96e-06	4.66e-05	GABRE	gamma-aminobutyric acid type A receptor subunit epsilon	2564
ENSG00000110852	381.72	0.99	0.211279	4.68532	2.8e-06	6.15e-05	CLEC2B	C-type lectin domain family 2 member B	9976
ENSG00000250722	69.82	0.99	0.342964	2.93069	0.00338208	0.0148503	SELENOP	selenoprotein P	6414
ENSG00000112796	39.39	0.99	0.337548	2.94675	0.00321133	0.0142453	ENPP5	ectonucleotide pyrophosphatase/phosphodiesterase family member 5	59084
ENSG00000251003	25.65	0.99	0.294618	3.37763	0.000731127	0.00453717	NA	NA	NA
ENSG00000240990	22.13	0.99	0.274549	3.58596	0.000335836	0.00248736	HOXA11-AS	HOXA11 antisense RNA	221883
ENSG00000230838	21.17	0.99	0.318455	3.1103	0.00186896	0.00934673	NA	NA	NA
ENSG00000179855	5.33	0.99	0.28976	3.38876	0.000702081	0.00439606	GIPC3	GIPC PDZ domain containing family member 3	126326
ENSG00000163012	1.62	0.99	0.345542	2.77354	0.00554492	0.0218954	ZSWIM2	zinc finger SWIM-type containing 2	151112
ENSG00000153233	1.31	0.99	0.342246	2.9385	0.00329801	0.0145642	PTPRR	protein tyrosine phosphatase receptor type R	5801
ENSG00000141506	1.3	0.99	0.319269	3.27389	0.00106078	0.00603374	PIK3R5	phosphoinositide-3-kinase regulatory subunit 5	23533
ENSG00000227189	1.18	0.99	0.345927	2.74337	0.00608118	0.0235493	NA	NA	NA
ENSG00000153789	1.14	0.99	0.334915	3.05853	0.00222425	0.0107279	CIBAR2	CBY1 interacting BAR domain containing 2	339145
ENSG00000239511	0.84	0.99	0.333058	2.90245	0.0037025	0.0159838	NA	NA	NA
ENSG00000270030	0.69	0.99	0.323892	2.95265	0.0031506	0.014042	NA	NA	NA
ENSG00000022267	743.98	0.98	0.321678	3.0657	0.00217164	0.0105646	FHL1	four and a half LIM domains 1	2273
ENSG00000115318	712.35	0.98	0.282998	3.45804	0.000544131	0.00360892	LOXL3	lysyl oxidase like 3	84695
ENSG00000132274	708.03	0.98	0.17542	5.58441	2.34e-08	1.23e-06	TRIM22	tripartite motif containing 22	10346
ENSG00000149577	681.6	0.98	0.127101	7.71103	1.25e-14	6.32e-12	SIDT2	SID1 transmembrane family member 2	51092
ENSG00000057657	347.28	0.98	0.246738	3.96207	7.43e-05	0.000783058	PRDM1	PR/SET domain 1	639
ENSG00000133169	229.83	0.98	0.306835	3.20005	0.00137404	0.00735497	BEX1	brain expressed X-linked 1	55859
ENSG00000125730	204.18	0.98	0.347439	2.90149	0.00371395	0.0160046	C3	complement C3	718
ENSG00000092096	138.53	0.98	0.206104	4.73534	2.19e-06	5.11e-05	SLC22A17	solute carrier family 22 member 17	51310
ENSG00000233452	123.61	0.98	0.236634	4.13433	3.56e-05	0.000445018	STXBP5-AS1	STXBP5 antisense RNA 1	729178
ENSG00000240563	110.31	0.98	0.346877	2.92689	0.00342373	0.0149887	L1TD1	LINE1 type transposase domain containing 1	54596
ENSG00000103485	56.39	0.98	0.326888	3.00297	0.00267363	0.0123686	QPRT	quinolinate phosphoribosyltransferase	23475
ENSG00000119227	44.49	0.98	0.231689	4.21327	2.52e-05	0.000337714	PIGZ	phosphatidylinositol glycan anchor biosynthesis class Z	80235
ENSG00000134201	35.46	0.98	0.285667	3.42883	0.000606178	0.00392136	GSTM5	glutathione S-transferase mu 5	2949
ENSG00000102057	25.94	0.98	0.232597	4.18795	2.81e-05	0.000369438	KCND1	potassium voltage-gated channel subfamily D member 1	3750
ENSG00000002746	19.84	0.98	0.308525	3.18964	0.0014245	0.00755992	HECW1	HECT, C2 and WW domain containing E3 ubiquitin protein ligase 1	23072
ENSG00000170579	10.38	0.98	0.339485	2.88765	0.00388137	0.0165776	DLGAP1	DLG associated protein 1	9229
ENSG00000265096	3.27	0.98	0.3277	2.95838	0.00309264	0.0138253	NA	NA	NA
ENSG00000050555	2.16	0.98	0.344389	2.80062	0.00510049	0.0205449	LAMC3	laminin subunit gamma 3	10319
ENSG00000126353	2.07	0.98	0.332223	2.86714	0.00414193	0.0174276	CCR7	C-C motif chemokine receptor 7	1236
ENSG00000257108	1.92	0.98	0.33903	2.81991	0.00480369	0.0196245	NHLRC4	NHL repeat containing 4	283948
ENSG00000066056	1.33	0.98	0.346696	2.71444	0.00663876	0.0252315	TIE1	tyrosine kinase with immunoglobulin like and EGF like domains 1	7075
ENSG00000154016	1.25	0.98	0.346738	2.81806	0.00483149	0.0197088	GRAP	GRB2 related adaptor protein	10750
ENSG00000118503	813.34	0.97	0.244717	3.95979	7.5e-05	0.00078927	TNFAIP3	TNF alpha induced protein 3	7128
ENSG00000183160	452.74	0.97	0.329952	2.95362	0.00314066	0.0140042	TMEM119	transmembrane protein 119	338773
ENSG00000130707	380.71	0.97	0.23213	4.15934	3.19e-05	0.000408325	ASS1	argininosuccinate synthase 1	445
ENSG00000180573	301.7	0.97	0.19622	4.94256	7.71e-07	2.23e-05	H2AC6	H2A clustered histone 6	8334
ENSG00000180914	193.14	0.97	0.316105	3.07337	0.00211656	0.0103458	OXTR	oxytocin receptor	5021
ENSG00000064687	70.16	0.97	0.180223	5.38121	7.4e-08	3.19e-06	ABCA7	ATP binding cassette subfamily A member 7	10347
ENSG00000184702	67.18	0.97	0.144984	6.68929	2.24e-11	3.86e-09	SEPTIN5	septin 5	5413
ENSG00000106025	31.39	0.97	0.2348	4.12559	3.7e-05	0.000457578	TSPAN12	tetraspanin 12	23554
ENSG00000158406	27.97	0.97	0.233972	4.14077	3.46e-05	0.000435156	H4C8	H4 clustered histone 8	8365
ENSG00000126785	14.52	0.97	0.34211	2.87309	0.00406476	0.0172044	RHOJ	ras homolog family member J	57381
ENSG00000152402	9.83	0.97	0.346909	2.83344	0.00460499	0.0189657	GUCY1A2	guanylate cyclase 1 soluble subunit alpha 2	2977
ENSG00000228784	8.55	0.97	0.271559	3.56825	0.000359377	0.00262399	LINC00954	long intergenic non-protein coding RNA 954	400946
ENSG00000132465	5.46	0.97	0.299973	3.19676	0.00138981	0.00741461	JCHAIN	joining chain of multimeric IgA and IgM	3512
ENSG00000006606	4.61	0.97	0.297348	3.2408	0.00119195	0.0066176	CCL26	C-C motif chemokine ligand 26	10344
ENSG00000119125	4.48	0.97	0.347442	3.12355	0.00178684	0.00903225	GDA	guanine deaminase	9615
ENSG00000120327	3.8	0.97	0.344409	2.81336	0.00490261	0.0199271	PCDHB14	protocadherin beta 14	56122
ENSG00000253702	2.42	0.97	0.343664	2.79255	0.00522948	0.020907	NA	NA	NA
ENSG00000238039	1.51	0.97	0.341239	2.7439	0.00607147	0.0235211	NA	NA	NA
ENSG00000105371	1.51	0.97	0.346676	2.71677	0.00659215	0.025094	ICAM4	intercellular adhesion molecule 4 (Landsteiner-Wiener blood group)	3386
ENSG00000171303	1.26	0.97	0.323525	3.11717	0.00182595	0.00918163	KCNK3	potassium two pore domain channel subfamily K member 3	3777
ENSG00000272632	1.25	0.97	0.346874	2.80389	0.00504893	0.0204013	NA	NA	NA
ENSG00000179082	1.24	0.97	0.346126	2.7687	0.00562805	0.0221691	NA	NA	NA
ENSG00000120328	0.8	0.97	0.335788	2.86853	0.00412384	0.0173743	PCDHB12	protocadherin beta 12	56124
ENSG00000115414	565018	0.96	0.169467	5.65546	1.55e-08	8.88e-07	FN1	fibronectin 1	2335
ENSG00000120899	473.35	0.96	0.235709	4.05716	4.97e-05	0.000575101	PTK2B	protein tyrosine kinase 2 beta	2185
ENSG00000006756	320.98	0.96	0.147402	6.52755	6.69e-11	9.75e-09	ARSD	arylsulfatase D	414
ENSG00000138764	305.47	0.96	0.222552	4.31208	1.62e-05	0.000239863	CCNG2	cyclin G2	901
ENSG00000163346	210.05	0.96	0.216704	4.42432	9.67e-06	0.000162685	PBXIP1	PBX homeobox interacting protein 1	57326
ENSG00000100342	101.93	0.96	0.323627	2.97272	0.00295175	0.0133662	APOL1	apolipoprotein L1	8542
ENSG00000130304	85.81	0.96	0.173082	5.52446	3.3e-08	1.64e-06	SLC27A1	solute carrier family 27 member 1	376497
ENSG00000116117	67.65	0.96	0.280871	3.41262	0.000643422	0.00410758	PARD3B	par-3 family cell polarity regulator beta	117583
ENSG00000230487	66.81	0.96	0.228472	4.21146	2.54e-05	0.000339485	PSMG3-AS1	PSMG3 antisense RNA 1 (head to head)	114796
ENSG00000132000	39.61	0.96	0.24853	3.87066	0.000108541	0.00105123	PODNL1	podocan like 1	79883
ENSG00000164659	35.06	0.96	0.329606	2.93225	0.00336514	0.0147995	ELAPOR2	endosome-lysosome associated apoptosis and autophagy regulator family member 2	222223
ENSG00000130176	27.36	0.96	0.347241	2.84611	0.00442565	0.0183685	CNN1	calponin 1	1264
ENSG00000267280	16.33	0.96	0.256363	3.74431	0.000180891	0.00154725	TBX2-AS1	TBX2 antisense RNA 1	103689912
ENSG00000197813	7.16	0.96	0.289541	3.28449	0.00102169	0.00586185	NA	NA	NA
ENSG00000131831	5.71	0.96	0.342417	2.8122	0.00492042	0.0199742	RAI2	retinoic acid induced 2	10742
ENSG00000101605	5.05	0.96	0.311125	3.06132	0.00220365	0.0106794	MYOM1	myomesin 1	8736
ENSG00000185352	3.31	0.96	0.330367	2.86878	0.00412062	0.0173683	HS6ST3	heparan sulfate 6-O-sulfotransferase 3	266722
ENSG00000166448	2.86	0.96	0.347463	2.77691	0.00548783	0.0217189	TMEM130	transmembrane protein 130	222865
ENSG00000006747	2.4	0.96	0.342117	2.85454	0.00430991	0.0179773	SCIN	scinderin	85477
ENSG00000152154	2.28	0.96	0.347305	2.74878	0.00598182	0.0232628	TMEM178A	transmembrane protein 178A	130733
ENSG00000156127	2.24	0.96	0.341706	2.86719	0.00414129	0.0174276	BATF	basic leucine zipper ATF-like transcription factor	10538
ENSG00000010319	1.42	0.96	0.327426	3.10857	0.00187998	0.00938724	SEMA3G	semaphorin 3G	56920
ENSG00000249430	1.05	0.96	0.345572	2.77966	0.00544156	0.0215802	NA	NA	NA
ENSG00000168542	54187.1	0.95	0.200538	4.73158	2.23e-06	5.17e-05	COL3A1	collagen type III alpha 1 chain	1281
ENSG00000142156	27941.1	0.95	0.190467	4.97964	6.37e-07	1.92e-05	COL6A1	collagen type VI alpha 1 chain	1291
ENSG00000140416	7557.5	0.95	0.200001	4.72842	2.26e-06	5.22e-05	TPM1	tropomyosin 1	7168
ENSG00000166033	6207.71	0.95	0.148744	6.36943	1.9e-10	2.24e-08	HTRA1	HtrA serine peptidase 1	5654
ENSG00000070540	1210.5	0.95	0.162685	5.84253	5.14e-09	3.6e-07	WIPI1	WD repeat domain, phosphoinositide interacting 1	55062
ENSG00000134247	1143.41	0.95	0.236201	4.03967	5.35e-05	0.000606843	PTGFRN	prostaglandin F2 receptor inhibitor	5738
ENSG00000126562	548.59	0.95	0.219943	4.33765	1.44e-05	0.000220942	WNK4	WNK lysine deficient protein kinase 4	65266
ENSG00000105520	508.28	0.95	0.166533	5.71601	1.09e-08	6.75e-07	PLPPR2	phospholipid phosphatase related 2	64748
ENSG00000064309	49.56	0.95	0.194369	4.87749	1.07e-06	2.89e-05	CDON	cell adhesion associated, oncogene regulated	50937
ENSG00000112294	38.13	0.95	0.27237	3.48746	0.000487633	0.00331177	ALDH5A1	aldehyde dehydrogenase 5 family member A1	7915
ENSG00000233532	28.77	0.95	0.272623	3.47899	0.000503302	0.0033938	LINC00460	long intergenic non-protein coding RNA 460	728192
ENSG00000140465	20.72	0.95	0.344821	2.79355	0.00521332	0.0208641	CYP1A1	cytochrome P450 family 1 subfamily A member 1	1543
ENSG00000253746	13.37	0.95	0.277975	3.42267	0.000620083	0.00398634	NA	NA	NA
ENSG00000157343	12.37	0.95	0.260062	3.63184	0.00028141	0.00217078	ARMC12	armadillo repeat containing 12	221481
ENSG00000164440	5.82	0.95	0.327454	2.89507	0.0037907	0.0162765	TXLNB	taxilin beta	167838
ENSG00000233901	5.63	0.95	0.346436	2.7606	0.00576953	0.0226165	LINC01503	long intergenic non-protein coding RNA 1503	100506119
ENSG00000244459	5.01	0.95	0.326112	2.911	0.00360277	0.0156654	NA	NA	NA
ENSG00000091536	4.76	0.95	0.273738	3.4295	0.000604695	0.00391535	MYO15A	myosin XVA	51168
ENSG00000122121	3.85	0.95	0.312268	3.916	9e-05	0.000909485	XPNPEP2	X-prolyl aminopeptidase 2	7512
ENSG00000186827	2.9	0.95	0.344098	2.8312	0.00463739	0.0190828	TNFRSF4	TNF receptor superfamily member 4	7293
ENSG00000104313	2.46	0.95	0.347411	2.72507	0.0064288	0.0246084	EYA1	EYA transcriptional coactivator and phosphatase 1	2138
ENSG00000267543	2.29	0.95	0.343917	2.74007	0.00614254	0.0237106	NA	NA	NA
ENSG00000085741	1.68	0.95	0.346617	2.68403	0.00727396	0.0271157	WNT11	Wnt family member 11	7481
ENSG00000225407	1.29	0.95	0.341031	2.86275	0.00419984	0.0176212	NA	NA	NA
ENSG00000134871	10885.8	0.94	0.237895	3.93491	8.32e-05	0.000856489	COL4A2	collagen type IV alpha 2 chain	1284
ENSG00000103381	1125.26	0.94	0.185484	5.06314	4.12e-07	1.33e-05	CPPED1	calcineurin like phosphoesterase domain containing 1	55313
ENSG00000087266	556.33	0.94	0.159776	5.86889	4.39e-09	3.16e-07	SH3BP2	SH3 domain binding protein 2	6452
ENSG00000047346	386.09	0.94	0.176489	5.32218	1.03e-07	4.25e-06	FAM214A	family with sequence similarity 214 member A	56204
ENSG00000164938	272.95	0.94	0.21331	4.42618	9.59e-06	0.000161855	TP53INP1	tumor protein p53 inducible nuclear protein 1	94241
ENSG00000258727	99.62	0.94	0.194568	4.8398	1.3e-06	3.4e-05	AP1G2-AS1	AP1G2 antisense RNA 1	102724814
ENSG00000180596	48.84	0.94	0.22791	4.13485	3.55e-05	0.000444356	H2BC4	H2B clustered histone 4	8347
ENSG00000180155	31.83	0.94	0.262047	3.59191	0.000328267	0.00244727	LYNX1	Ly6/neurotoxin 1	66004
ENSG00000154917	24.65	0.94	0.228058	4.13179	3.6e-05	0.000447702	RAB6B	RAB6B, member RAS oncogene family	51560
ENSG00000139835	23.45	0.94	0.303004	3.09491	0.00196875	0.00973692	GRTP1	growth hormone regulated TBC protein 1	79774
ENSG00000185100	13.4	0.94	0.243267	3.83255	0.000126824	0.00118422	ADSS1	adenylosuccinate synthase 1	122622
ENSG00000228288	9.98	0.94	0.267486	3.51392	0.000441548	0.00307916	PCAT6	prostate cancer associated transcript 6	100506696
ENSG00000133401	8.37	0.94	0.335902	2.81741	0.00484128	0.0197362	PDZD2	PDZ domain containing 2	23037
ENSG00000102048	8.07	0.94	0.272871	3.42339	0.000618453	0.00397852	ASB9	ankyrin repeat and SOCS box containing 9	140462
ENSG00000140807	6.11	0.94	0.340044	2.76889	0.00562475	0.0221652	NKD1	NKD inhibitor of WNT signaling pathway 1	85407
ENSG00000196963	5.45	0.94	0.343561	2.74673	0.00601925	0.0233659	NA	NA	NA
ENSG00000162543	4.6	0.94	0.34743	2.72978	0.00633765	0.0243078	UBXN10	UBX domain protein 10	127733
ENSG00000267750	2.82	0.94	0.302911	3.05037	0.00228559	0.0109415	NA	NA	NA
ENSG00000232679	2.31	0.94	0.33966	2.85577	0.00429321	0.0179231	NA	NA	NA
ENSG00000261685	1.95	0.94	0.335796	3.01855	0.00253986	0.0118868	NA	NA	NA
ENSG00000273471	1.8	0.94	0.346649	2.7018	0.00689643	0.0259902	NA	NA	NA
ENSG00000260454	1.69	0.94	0.31154	3.37386	0.000741225	0.00457076	NA	NA	NA
ENSG00000173077	1.68	0.94	0.347351	2.67073	0.00756863	0.0279598	DELEC1	deleted in esophageal cancer 1	50514
ENSG00000189196	1.36	0.94	0.344956	2.61787	0.00884805	0.0315249	LINC00994	long intergenic non-protein coding RNA 994	100287879
ENSG00000259275	1.29	0.94	0.345316	2.60898	0.00908132	0.0321714	NA	NA	NA
ENSG00000170848	0.95	0.94	0.317384	2.89801	0.00375534	0.0161504	PSG6	pregnancy specific beta-1-glycoprotein 6	5675
ENSG00000196329	0.82	0.94	0.321229	2.84131	0.00449282	0.0185872	GIMAP5	GTPase, IMAP family member 5	55340
ENSG00000166963	2534.8	0.93	0.245048	3.80801	0.000140092	0.001282	MAP1A	microtubule associated protein 1A	4130
ENSG00000221968	857.31	0.93	0.175558	5.27287	1.34e-07	5.22e-06	FADS3	fatty acid desaturase 3	3995
ENSG00000178764	146.46	0.93	0.174088	5.32976	9.83e-08	4.09e-06	ZHX2	zinc fingers and homeoboxes 2	22882
ENSG00000105792	85.69	0.93	0.237892	3.90995	9.23e-05	0.000927696	CFAP69	cilia and flagella associated protein 69	79846
ENSG00000134548	78.34	0.93	0.298823	3.12058	0.00180495	0.00909237	SPX	spexin hormone	80763
ENSG00000135736	49.4	0.93	0.204705	4.56205	5.07e-06	9.81e-05	CCDC102A	coiled-coil domain containing 102A	92922
ENSG00000081853	36.9	0.93	0.249551	3.71171	0.000205863	0.00170627	PCDHGA2	protocadherin gamma subfamily A, 2	56113
ENSG00000183114	30.3	0.93	0.29144	3.17805	0.00148268	0.00780201	FAM43B	family with sequence similarity 43 member B	163933
ENSG00000189001	28.62	0.93	0.28793	3.24069	0.00119239	0.00661814	SBSN	suprabasin	374897
ENSG00000111305	14.04	0.93	0.253068	3.68435	0.000229285	0.00185646	GSG1	germ cell associated 1	83445
ENSG00000254418	12.7	0.93	0.255986	3.61642	0.000298701	0.0022759	NA	NA	NA
ENSG00000251432	12.65	0.93	0.279738	3.32842	0.000873398	0.00517427	LINC02615	long intergenic non-protein coding RNA 2615	100507487
ENSG00000260941	8.47	0.93	0.298878	3.11017	0.00186977	0.00934836	LINC00622	long intergenic non-protein coding RNA 622	644242
ENSG00000010610	8	0.93	0.302125	4.09066	4.3e-05	0.000517306	CD4	CD4 molecule	920
ENSG00000172901	7.82	0.93	0.277773	3.33324	0.000858411	0.00510701	LVRN	laeverin	206338
ENSG00000167077	6.7	0.93	0.341184	2.7422	0.00610288	0.0236191	MEI1	meiotic double-stranded break formation protein 1	150365
ENSG00000102575	4.15	0.93	0.342583	2.7196	0.00653607	0.0249446	ACP5	acid phosphatase 5, tartrate resistant	54
ENSG00000142583	3.88	0.93	0.338382	2.72416	0.00644658	0.0246666	SLC2A5	solute carrier family 2 member 5	6518
ENSG00000105963	3.72	0.93	0.304417	3.02968	0.00244811	0.0115671	ADAP1	ArfGAP with dual PH domains 1	11033
ENSG00000187944	2.45	0.93	0.344296	2.67796	0.00740709	0.0274933	C2orf66	chromosome 2 open reading frame 66	401027
ENSG00000077943	1.62	0.93	0.304549	3.39189	0.000694134	0.00436047	ITGA8	integrin subunit alpha 8	8516
ENSG00000236819	1.21	0.93	0.313721	3.09285	0.00198246	0.00978723	LINC01563	long intergenic non-protein coding RNA 1563	101060544
ENSG00000263120	1.21	0.93	0.3473	2.6039	0.00921696	0.0325442	NA	NA	NA
ENSG00000234377	1.2	0.93	0.343411	2.60092	0.00929751	0.0327445	OBI1-AS1	OBI1 antisense RNA 1	100874222
ENSG00000238042	1.05	0.93	0.345819	2.71848	0.00655817	0.0250096	LINC02257	long intergenic non-protein coding RNA 2257	105372950
ENSG00000127743	0.93	0.93	0.342394	2.73715	0.00619741	0.0238936	IL17B	interleukin 17B	27190
ENSG00000113211	0.87	0.93	0.337724	2.75915	0.0057952	0.0226929	PCDHB6	protocadherin beta 6	56130
ENSG00000251679	0.78	0.93	0.333611	2.74738	0.00600741	0.023334	NA	NA	NA
ENSG00000185008	0.76	0.93	0.334577	2.75463	0.00587588	0.0229435	ROBO2	roundabout guidance receptor 2	6092
ENSG00000135914	0.75	0.93	0.32364	2.79031	0.00526583	0.0210175	HTR2B	5-hydroxytryptamine receptor 2B	3357
ENSG00000137573	2838.31	0.92	0.344995	2.70925	0.00674352	0.0255339	SULF1	sulfatase 1	23213
ENSG00000114270	2378.67	0.92	0.235035	3.89845	9.68e-05	0.000961323	COL7A1	collagen type VII alpha 1 chain	1294
ENSG00000118971	346.38	0.92	0.309944	2.99105	0.00278024	0.0127454	CCND2	cyclin D2	894
ENSG00000106733	243.1	0.92	0.134951	6.80514	1.01e-11	2e-09	NMRK1	nicotinamide riboside kinase 1	54981
ENSG00000005073	96.02	0.92	0.238616	3.84392	0.000121083	0.00114394	HOXA11	homeobox A11	3207
ENSG00000148426	60.01	0.92	0.306359	3.01268	0.00258956	0.0120608	PROSER2	proline and serine rich 2	254427
ENSG00000104435	25.91	0.92	0.344325	2.79525	0.00518599	0.0207867	STMN2	stathmin 2	11075
ENSG00000079337	22.28	0.92	0.294423	3.1266	0.00176837	0.0089483	RAPGEF3	Rap guanine nucleotide exchange factor 3	10411
ENSG00000049089	18.43	0.92	0.284368	3.21514	0.00130379	0.00707329	COL9A2	collagen type IX alpha 2 chain	1298
ENSG00000092529	11.23	0.92	0.294495	3.13581	0.00171381	0.00874806	CAPN3	calpain 3	825
ENSG00000205045	10.45	0.92	0.310179	2.97004	0.00297756	0.013442	SLFN12L	schlafen family member 12 like	100506736
ENSG00000130208	10.18	0.92	0.245972	3.71691	0.000201672	0.0016824	APOC1	apolipoprotein C1	341
ENSG00000179219	7.32	0.92	0.287905	3.17598	0.00149334	0.00783979	LINC00311	long intergenic non-protein coding RNA 311	197196
ENSG00000261118	5.83	0.92	0.2912	3.13169	0.00173802	0.00882735	NA	NA	NA
ENSG00000058335	4.84	0.92	0.347464	2.69193	0.00710408	0.0265906	RASGRF1	Ras protein specific guanine nucleotide releasing factor 1	5923
ENSG00000172476	4.26	0.92	0.319579	2.85955	0.00424244	0.0177651	RAB40A	RAB40A, member RAS oncogene family	142684
ENSG00000169291	3.99	0.92	0.347437	2.66806	0.00762903	0.028156	SHE	Src homology 2 domain containing E	126669
ENSG00000251417	3.79	0.92	0.327883	2.76671	0.00566247	0.0222773	NA	NA	NA
ENSG00000120729	2.88	0.92	0.346774	2.66279	0.00774952	0.0285077	MYOT	myotilin	9499
ENSG00000243243	1.99	0.92	0.333192	2.70318	0.00686802	0.0259127	NA	NA	NA
ENSG00000273368	1.67	0.92	0.338377	2.63931	0.00830759	0.0301176	NA	NA	NA
ENSG00000267013	1.5	0.92	0.317453	3.15287	0.00161671	0.00835487	LINC01929	long intergenic non-protein coding RNA 1929	101927229
ENSG00000172179	0.98	0.92	0.306115	2.9436	0.00324421	0.014354	PRL	prolactin	5617
ENSG00000070214	6293.41	0.91	0.134023	6.78299	1.18e-11	2.28e-09	SLC44A1	solute carrier family 44 member 1	23446
ENSG00000151388	1698.26	0.91	0.203679	4.45818	8.27e-06	0.000143531	ADAMTS12	ADAM metallopeptidase with thrombospondin type 1 motif 12	81792
ENSG00000108219	723.74	0.91	0.203834	4.47327	7.7e-06	0.000136075	TSPAN14	tetraspanin 14	81619
ENSG00000147883	323	0.91	0.252376	3.61365	0.000301917	0.00229314	CDKN2B	cyclin dependent kinase inhibitor 2B	1030
ENSG00000169184	239.7	0.91	0.306644	2.97044	0.00297374	0.013431	MN1	MN1 proto-oncogene, transcriptional regulator	4330
ENSG00000142910	179.8	0.91	0.347126	2.69803	0.00697515	0.0262355	TINAGL1	tubulointerstitial nephritis antigen like 1	64129
ENSG00000116194	103.46	0.91	0.228373	3.9957	6.45e-05	0.000701273	ANGPTL1	angiopoietin like 1	9068
ENSG00000172817	57.95	0.91	0.296448	3.0576	0.0022312	0.0107426	CYP7B1	cytochrome P450 family 7 subfamily B member 1	9420
ENSG00000105991	41.67	0.91	0.244158	3.73831	0.000185258	0.00157343	HOXA1	homeobox A1	3198
ENSG00000237149	24.9	0.91	0.207444	4.36067	1.3e-05	0.000202977	ZNF503-AS2	ZNF503 antisense RNA 2	100131213
ENSG00000151117	11.99	0.91	0.232038	3.89021	0.000100155	0.000986389	TMEM86A	transmembrane protein 86A	144110
ENSG00000100473	9.82	0.91	0.302711	3.0008	0.00269271	0.012424	COCH	cochlin	1690
ENSG00000255874	9.02	0.91	0.287828	3.14723	0.00164828	0.00848554	PRECSIT	p53 regulated carcinoma associated Stat3 activating long intergenic non-protein coding transcript	283487
ENSG00000136383	8.53	0.91	0.315994	2.87744	0.00400921	0.0170029	ALPK3	alpha kinase 3	57538
ENSG00000042832	8.45	0.91	0.279197	3.25934	0.00111673	0.00629067	TG	thyroglobulin	7038
ENSG00000174697	4.57	0.91	0.343333	2.71582	0.00661111	0.0251462	LEP	leptin	3952
ENSG00000227744	4.43	0.91	0.347437	2.6346	0.00842361	0.0304407	LINC01940	long intergenic non-protein coding RNA 1940	401039
ENSG00000196972	3.98	0.91	0.307928	2.93765	0.00330709	0.0145909	SMIM10L2B	small integral membrane protein 10 like 2B	644596
ENSG00000144671	2.59	0.91	0.314748	2.84868	0.00439006	0.0182562	SLC22A14	solute carrier family 22 member 14	9389
ENSG00000269463	2.55	0.91	0.326875	2.73286	0.00627863	0.0241198	NA	NA	NA
ENSG00000273312	2.35	0.91	0.34603	2.6243	0.0086827	0.0311084	NA	NA	NA
ENSG00000163075	1.78	0.91	0.329776	2.9847	0.00283858	0.0129463	CFAP221	cilia and flagella associated protein 221	200373
ENSG00000231638	1.55	0.91	0.34746	2.56896	0.0102004	0.035197	LUARIS	lncRNA upregulator of antiviral response interferon signaling	100506895
ENSG00000226526	1.19	0.91	0.345208	2.51771	0.0118121	0.0392393	NA	NA	NA
ENSG00000142173	25214.7	0.9	0.200029	4.47924	7.49e-06	0.00013352	COL6A2	collagen type VI alpha 2 chain	1292
ENSG00000102265	21542.2	0.9	0.194305	4.61694	3.89e-06	7.94e-05	TIMP1	TIMP metallopeptidase inhibitor 1	7076
ENSG00000123384	16746	0.9	0.167795	5.38304	7.32e-08	3.17e-06	LRP1	LDL receptor related protein 1	4035
ENSG00000166750	3482.74	0.9	0.171413	5.25084	1.51e-07	5.77e-06	SLFN5	schlafen family member 5	162394
ENSG00000119801	678.44	0.9	0.168404	5.33511	9.55e-08	3.99e-06	YPEL5	yippee like 5	51646
ENSG00000132334	231.54	0.9	0.27733	3.2531	0.00114155	0.00639678	PTPRE	protein tyrosine phosphatase receptor type E	5791
ENSG00000250479	197.08	0.9	0.199326	4.5137	6.37e-06	0.000117265	CHCHD10	coiled-coil-helix-coiled-coil-helix domain containing 10	400916
ENSG00000105711	98.22	0.9	0.248213	3.60858	0.00030788	0.00232741	SCN1B	sodium voltage-gated channel beta subunit 1	6324
ENSG00000152953	86.11	0.9	0.278624	3.21908	0.00128603	0.00700857	STK32B	serine/threonine kinase 32B	55351
ENSG00000121904	61.51	0.9	0.270105	3.33191	0.000862521	0.00512403	CSMD2	CUB and Sushi multiple domains 2	114784
ENSG00000257605	60.86	0.9	0.174697	5.15234	2.57e-07	9.09e-06	NA	NA	NA
ENSG00000157306	23.41	0.9	0.214394	4.1922	2.76e-05	0.000363832	NA	NA	NA
ENSG00000260230	5.05	0.9	0.316497	2.83248	0.00461891	0.0190148	FRRS1L	ferric chelate reductase 1 like	23732
ENSG00000251364	4.08	0.9	0.33787	2.65012	0.00804629	0.0293527	LOC100506258	uncharacterized LOC100506258	100506258
ENSG00000245848	3.04	0.9	0.346988	2.63631	0.00838124	0.0303217	CEBPA	CCAAT enhancer binding protein alpha	1050
ENSG00000273001	2.46	0.9	0.318014	2.78155	0.00540994	0.0214858	NA	NA	NA
ENSG00000249776	2.38	0.9	0.33706	2.63286	0.00846695	0.0305277	NA	NA	NA
ENSG00000119913	2.1	0.9	0.343823	2.64076	0.00827203	0.0300351	TECTB	tectorin beta	6975
ENSG00000170276	2.05	0.9	0.347463	2.58995	0.00959887	0.0336397	HSPB2	heat shock protein family B (small) member 2	3316
ENSG00000113231	1.62	0.9	0.342218	2.67385	0.00749864	0.0277652	PDE8B	phosphodiesterase 8B	8622
ENSG00000212993	1.24	0.9	0.344592	2.63592	0.00839093	0.0303511	POU5F1B	POU class 5 homeobox 1B	5462
ENSG00000108813	1.17	0.9	0.34719	2.54281	0.0109965	0.037158	DLX4	distal-less homeobox 4	1748
ENSG00000177234	0.64	0.9	0.338144	2.62698	0.0086145	NA	LINC01561	long intergenic non-protein coding RNA 1561	404216
ENSG00000142798	8496.54	0.89	0.180672	4.93825	7.88e-07	2.27e-05	HSPG2	heparan sulfate proteoglycan 2	3339
ENSG00000112655	1207.04	0.89	0.136439	6.54345	6.01e-11	8.9e-09	PTK7	protein tyrosine kinase 7 (inactive)	5754
ENSG00000080823	712.69	0.89	0.19366	4.57738	4.71e-06	9.27e-05	MOK	MOK protein kinase	5891
ENSG00000041880	224.95	0.89	0.127999	6.96171	3.36e-12	8.3e-10	PARP3	poly(ADP-ribose) polymerase family member 3	10039
ENSG00000248429	55.36	0.89	0.278042	3.18406	0.00145225	0.00767121	GASK1B-AS1	GASK1B antisense RNA 1	285505
ENSG00000162817	13.2	0.89	0.27353	3.24239	0.00118534	0.0065874	C1orf115	chromosome 1 open reading frame 115	79762
ENSG00000254774	12.16	0.89	0.342488	2.61978	0.00879851	0.0314065	NA	NA	NA
ENSG00000272720	9.15	0.89	0.269512	3.28421	0.00102268	0.00586383	NA	NA	NA
ENSG00000204362	8.2	0.89	0.342663	2.6247	0.00867261	0.0310781	LINC02783	long intergenic non-protein coding RNA 2783	400743
ENSG00000136449	7.94	0.89	0.297482	2.97205	0.0029582	0.0133796	MYCBPAP	MYCBP associated protein	84073
ENSG00000143217	7.71	0.89	0.293202	3.03353	0.00241712	0.0114534	NECTIN4	nectin cell adhesion molecule 4	81607
ENSG00000232600	6.43	0.89	0.317649	2.79544	0.00518283	0.0207867	NA	NA	NA
ENSG00000120262	5.73	0.89	0.33202	2.68972	0.00715132	0.0267332	CCDC170	coiled-coil domain containing 170	80129
ENSG00000112299	4.33	0.89	0.3471	2.56613	0.0102842	0.0354047	VNN1	vanin 1	8876
ENSG00000107742	3.37	0.89	0.346493	2.58231	0.00981422	0.0342015	SPOCK2	SPARC (osteonectin), cwcv and kazal like domains proteoglycan 2	9806
ENSG00000173212	2.8	0.89	0.335684	2.63321	0.0084583	0.0305145	MAB21L3	mab-21 like 3	126868
ENSG00000118004	2.46	0.89	0.342902	2.5739	0.010056	0.034811	COLEC11	collectin subfamily member 11	78989
ENSG00000225096	2.13	0.89	0.344324	2.55465	0.0106295	0.036313	NA	NA	NA
ENSG00000115165	2.1	0.89	0.314643	3.26551	0.00109268	0.00617613	CYTIP	cytohesin 1 interacting protein	9595
ENSG00000235532	1.33	0.89	0.347464	2.48882	0.012817	0.0417489	LINC00402	long intergenic non-protein coding RNA 402	100507612
ENSG00000131171	965.87	0.88	0.149657	5.8726	4.29e-09	3.12e-07	SH3BGRL	SH3 domain binding glutamate rich protein like	6451
ENSG00000146072	426.34	0.88	0.209835	4.18513	2.85e-05	0.000373492	TNFRSF21	TNF receptor superfamily member 21	27242
ENSG00000213626	144.08	0.88	0.320372	2.76959	0.0056126	0.0221218	LBH	LBH regulator of WNT signaling pathway	81606
ENSG00000142102	142.02	0.88	0.16672	5.28275	1.27e-07	5.08e-06	PGGHG	protein-glucosylgalactosylhydroxylysine glucosidase	80162
ENSG00000142408	117.61	0.88	0.317522	2.77657	0.0054936	0.0217369	CACNG8	calcium voltage-gated channel auxiliary subunit gamma 8	59283
ENSG00000139508	115.15	0.88	0.284923	3.09802	0.00194818	0.00966759	SLC46A3	solute carrier family 46 member 3	283537
ENSG00000174899	111.03	0.88	0.19145	4.58226	4.6e-06	9.09e-05	SLC66A1L	solute carrier family 66 member 1 like	152078
ENSG00000197077	80.48	0.88	0.344887	2.57852	0.00992235	0.0344535	KIAA1671	KIAA1671	85379
ENSG00000229334	61.64	0.88	0.190149	4.60649	4.1e-06	8.28e-05	NA	NA	NA
ENSG00000162631	57.28	0.88	0.341973	2.60507	0.00918543	0.0324538	NTNG1	netrin G1	22854
ENSG00000110042	47.61	0.88	0.311328	2.82484	0.00473049	0.0193789	DTX4	deltex E3 ubiquitin ligase 4	23220
ENSG00000103569	36.74	0.88	0.343951	2.68294	0.0072977	0.0271783	AQP9	aquaporin 9	366
ENSG00000110628	28.33	0.88	0.231544	3.782	0.000155572	0.00138163	SLC22A18	solute carrier family 22 member 18	5002
ENSG00000067606	26.97	0.88	0.198334	4.43271	9.31e-06	0.000158136	PRKCZ	protein kinase C zeta	5590
ENSG00000137463	25.3	0.88	0.282992	3.10055	0.00193159	0.00960012	MGARP	mitochondria localized glutamic acid rich protein	84709
ENSG00000136367	19.3	0.88	0.315652	2.79976	0.00511403	0.0205737	ZFHX2	zinc finger homeobox 2	85446
ENSG00000143473	12.88	0.88	0.338695	2.62011	0.00879016	0.0313825	KCNH1	potassium voltage-gated channel subfamily H member 1	3756
ENSG00000214694	10.57	0.88	0.249288	3.49966	0.000465861	0.00319434	ARHGEF33	Rho guanine nucleotide exchange factor 33	100271715
ENSG00000182612	10.49	0.88	0.286195	3.06016	0.00221217	0.0106991	TSPAN10	tetraspanin 10	83882
ENSG00000203497	8.15	0.88	0.21943	3.99452	6.48e-05	0.000703986	NA	NA	NA
ENSG00000270810	4.95	0.88	0.268561	3.24667	0.00116765	0.00651652	NA	NA	NA
ENSG00000175746	3.63	0.88	0.345084	2.56412	0.0103438	0.0355878	LINC02915	long intergenic non-protein coding RNA 2915	400360
ENSG00000272482	2.37	0.88	0.34315	2.52781	0.0114775	0.0383661	NA	NA	NA
ENSG00000224034	2.34	0.88	0.343388	2.53347	0.0112939	0.0379169	LINC02561	long intergenic non-protein coding RNA 2561	110806285
ENSG00000181374	1.85	0.88	0.297426	3.19338	0.00140618	0.00747713	CCL13	C-C motif chemokine ligand 13	6357
ENSG00000075073	1.74	0.88	0.343751	2.52623	0.0115293	0.0385256	TACR2	tachykinin receptor 2	6865
ENSG00000174083	1.58	0.88	0.31853	3.03568	0.00239994	0.0113926	NA	NA	NA
ENSG00000166035	1.56	0.88	0.34707	2.49474	0.012605	0.0412608	LIPC	lipase C, hepatic type	3990
ENSG00000019186	1.45	0.88	0.347231	0.589157	0.555756	0.698809	CYP24A1	cytochrome P450 family 24 subfamily A member 1	1591
ENSG00000261140	1.41	0.88	0.343367	2.48633	0.0129067	0.0419985	NA	NA	NA
ENSG00000140795	1.27	0.88	0.344548	2.46721	0.0136168	0.0437987	MYLK3	myosin light chain kinase 3	91807
ENSG00000232504	1.04	0.88	0.347178	2.42951	0.0151193	0.0476055	NA	NA	NA
ENSG00000135333	0.7	0.88	0.329515	1.36662	0.171744	0.304574	EPHA7	EPH receptor A7	2045
ENSG00000214548	9582.46	0.87	0.153601	5.67162	1.41e-08	8.18e-07	MEG3	maternally expressed 3	55384
ENSG00000104368	3941.42	0.87	0.23863	3.63069	0.000282659	0.0021778	PLAT	plasminogen activator, tissue type	5327
ENSG00000154188	1504.83	0.87	0.143899	6.01511	1.8e-09	1.44e-07	ANGPT1	angiopoietin 1	284
ENSG00000163683	1351.49	0.87	0.235658	3.6734	0.00023934	0.00192572	SMIM14	small integral membrane protein 14	201895
ENSG00000123933	1057.54	0.87	0.150663	5.76168	8.33e-09	5.38e-07	MXD4	MAX dimerization protein 4	10608
ENSG00000133805	294.6	0.87	0.177582	4.88503	1.03e-06	2.8e-05	AMPD3	adenosine monophosphate deaminase 3	272
ENSG00000166510	235.84	0.87	0.27007	3.22982	0.00123866	0.00681209	CCDC68	coiled-coil domain containing 68	80323
ENSG00000178685	158.88	0.87	0.21281	4.07385	4.62e-05	0.000544226	PARP10	poly(ADP-ribose) polymerase family member 10	84875
ENSG00000006740	69.69	0.87	0.228589	3.79218	0.000149333	0.00134107	ARHGAP44	Rho GTPase activating protein 44	9912
ENSG00000266208	66.19	0.87	0.182172	4.77385	1.81e-06	4.38e-05	NA	NA	NA
ENSG00000247809	33.39	0.87	0.211684	4.10488	4.05e-05	0.000493269	NR2F2-AS1	NR2F2 antisense RNA 1	644192
ENSG00000128482	28.92	0.87	0.316538	2.76	0.00578006	0.0226474	RNF112	ring finger protein 112	7732
ENSG00000173702	21.62	0.87	0.339228	2.58637	0.00969933	0.0338931	MUC13	mucin 13, cell surface associated	56667
ENSG00000198106	5.61	0.87	0.269314	3.22339	0.00126684	0.00691967	NA	NA	NA
ENSG00000268650	4.23	0.87	0.346331	2.53832	0.0111385	0.0375323	LOC102725254	uncharacterized LOC102725254	102725254
ENSG00000162078	1.97	0.87	0.34033	2.60916	0.0090765	0.0321603	ZG16B	zymogen granule protein 16B	124220
ENSG00000273415	1.92	0.87	0.337587	2.63871	0.00832217	0.0301534	NA	NA	NA
ENSG00000214402	1.17	0.87	0.3082	2.93122	0.00337636	0.0148286	LCNL1	lipocalin like 1	401562
ENSG00000108405	1.1	0.87	0.326513	2.76038	0.00577337	0.0226258	P2RX1	purinergic receptor P2X 1	5023
ENSG00000250049	0.69	0.87	0.340917	2.53276	0.0113169	0.0379807	NA	NA	NA
ENSG00000102882	822.37	0.86	0.141874	6.04619	1.48e-09	1.22e-07	MAPK3	mitogen-activated protein kinase 3	5595
ENSG00000181751	802.26	0.86	0.154764	5.53853	3.05e-08	1.54e-06	MACIR	macrophage immunometabolism regulator	90355
ENSG00000141068	147.01	0.86	0.202116	4.25565	2.08e-05	0.000292736	KSR1	kinase suppressor of ras 1	8844
ENSG00000198286	124.74	0.86	0.330107	2.62856	0.00857477	0.0308081	CARD11	caspase recruitment domain family member 11	84433
ENSG00000215769	107.91	0.86	0.182435	4.70238	2.57e-06	5.74e-05	ARHGAP27P1-BPTFP1-KPNA2P3	ARHGAP27P1-BPTFP1-KPNA2P3 readthrough, transcribed pseudogene	109286553
ENSG00000126709	74.62	0.86	0.240772	3.58629	0.000335409	0.00248627	IFI6	interferon alpha inducible protein 6	2537
ENSG00000170954	71.6	0.86	0.237641	3.62484	0.000289136	0.00221617	ZNF415	zinc finger protein 415	55786
ENSG00000122986	58.34	0.86	0.18397	4.66326	3.11e-06	6.69e-05	HVCN1	hydrogen voltage gated channel 1	84329
ENSG00000169116	45.6	0.86	0.309701	2.78651	0.00532784	0.0212083	PARM1	prostate androgen-regulated mucin-like protein 1	25849
ENSG00000232855	37.99	0.86	0.343001	2.54476	0.0109353	0.0370033	NA	NA	NA
ENSG00000177335	37.65	0.86	0.187821	4.5881	4.47e-06	8.91e-05	LINC02904	long intergenic non-protein coding RNA 2904	286122
ENSG00000257702	33.29	0.86	0.203253	4.21009	2.55e-05	0.000341078	LBX2-AS1	LBX2 antisense RNA 1	151534
ENSG00000167103	32.29	0.86	0.255321	3.35733	0.000786989	0.00479212	PIP5KL1	phosphatidylinositol-4-phosphate 5-kinase like 1	138429
ENSG00000161681	28.83	0.86	0.257251	3.33838	0.000842687	0.00502948	SHANK1	SH3 and multiple ankyrin repeat domains 1	50944
ENSG00000095637	24.87	0.86	0.296648	2.91093	0.00360351	0.0156654	SORBS1	sorbin and SH3 domain containing 1	10580
ENSG00000257298	22.03	0.86	0.229721	3.74126	0.000183101	0.00156108	NA	NA	NA
ENSG00000258461	13.35	0.86	0.298502	2.87948	0.00398336	0.0169287	NA	NA	NA
ENSG00000185972	12.63	0.86	0.305843	2.79533	0.0051847	0.0207867	CCIN	calicin	881
ENSG00000234409	12.43	0.86	0.328019	2.6328	0.0084683	0.0305277	CCDC188	coiled-coil domain containing 188	388849
ENSG00000267530	4.83	0.86	0.282093	3.01973	0.00253001	0.0118609	LINC01836	long intergenic non-protein coding RNA 1836	107985343
ENSG00000187243	4.04	0.86	0.276744	3.05921	0.00221922	0.0107192	MAGED4B	MAGE family member D4B	81557
ENSG00000182912	1.74	0.86	0.347464	2.44456	0.0145027	0.0460177	NA	NA	NA
ENSG00000213694	4442.16	0.85	0.152173	5.61793	1.93e-08	1.06e-06	S1PR3	sphingosine-1-phosphate receptor 3	1903
ENSG00000150907	1603.3	0.85	0.197085	4.3091	1.64e-05	0.000241852	FOXO1	forkhead box O1	2308
ENSG00000138347	1103.83	0.85	0.235649	3.60708	0.000309658	0.00233718	MYPN	myopalladin	84665
ENSG00000104361	758.45	0.85	0.127179	6.69106	2.22e-11	3.84e-09	NIPAL2	NIPA like domain containing 2	79815
ENSG00000141441	599.52	0.85	0.160261	5.27429	1.33e-07	5.22e-06	GAREM1	GRB2 associated regulator of MAPK1 subtype 1	64762
ENSG00000162706	513.72	0.85	0.324947	2.61538	0.00891276	0.0316996	CADM3	cell adhesion molecule 3	57863
ENSG00000167157	289.35	0.85	0.23631	3.58582	0.000336014	0.00248736	PRRX2	paired related homeobox 2	51450
ENSG00000150540	231.68	0.85	0.240366	3.54898	0.000386728	0.00278879	HNMT	histamine N-methyltransferase	3176
ENSG00000160326	175.08	0.85	0.155044	5.45723	4.84e-08	2.29e-06	SLC2A6	solute carrier family 2 member 6	11182
ENSG00000174080	99.06	0.85	0.171962	4.91716	8.78e-07	2.46e-05	CTSF	cathepsin F	8722
ENSG00000149633	84.24	0.85	0.285126	2.99579	0.00273738	0.0125819	KIAA1755	KIAA1755	85449
ENSG00000222022	42.21	0.85	0.256853	3.31748	0.00090833	0.00533526	NA	NA	NA
ENSG00000261652	22.55	0.85	0.223626	3.79635	0.000146843	0.00132551	C15orf65	chromosome 15 open reading frame 65	145788
ENSG00000197580	13	0.85	0.26911	3.16541	0.00154866	0.00806324	BCO2	beta-carotene oxygenase 2	83875
ENSG00000117643	8.17	0.85	0.31847	2.67616	0.00744706	0.027606	MAN1C1	mannosidase alpha class 1C member 1	57134
ENSG00000223396	5.96	0.85	0.285298	2.95048	0.00317277	0.0141147	NA	NA	NA
ENSG00000068976	4.3	0.85	0.276642	3.05529	0.00224841	0.0108011	PYGM	glycogen phosphorylase, muscle associated	5837
ENSG00000164106	4.08	0.85	0.343544	2.55357	0.0106626	0.0363874	SCRG1	stimulator of chondrogenesis 1	11341
ENSG00000021300	3.06	0.85	0.324323	2.58447	0.00975291	0.0340432	PLEKHB1	pleckstrin homology domain containing B1	58473
ENSG00000084674	2.66	0.85	0.326157	2.8213	0.00478295	0.0195523	APOB	apolipoprotein B	338
ENSG00000260123	2.31	0.85	0.334973	2.50281	0.0123211	0.0405657	NA	NA	NA
ENSG00000272970	2.24	0.85	0.34362	2.45785	0.0139773	0.0447413	LOC107986163	uncharacterized LOC107986163	107986163
ENSG00000253357	2.05	0.85	0.347461	2.43043	0.015081	0.0475158	NA	NA	NA
ENSG00000179058	1.39	0.85	0.347338	2.39589	0.0165802	0.0512086	C9orf50	chromosome 9 open reading frame 50	375759
ENSG00000167759	1.38	0.85	0.344742	2.40307	0.016258	0.0504483	KLK13	kallikrein related peptidase 13	26085
ENSG00000154485	1.23	0.85	0.347186	2.38031	0.0172982	0.0530181	MMP21	matrix metallopeptidase 21	118856
ENSG00000183454	1.06	0.85	0.335798	2.63228	0.00848138	0.0305692	GRIN2A	glutamate ionotropic receptor NMDA type subunit 2A	2903
ENSG00000110243	0.83	0.85	0.333549	2.54988	0.0107761	0.0366447	APOA5	apolipoprotein A5	116519
ENSG00000251562	32224.9	0.84	0.175864	4.75259	2.01e-06	4.75e-05	MALAT1	metastasis associated lung adenocarcinoma transcript 1	378938
ENSG00000107796	808.34	0.84	0.25418	3.30157	0.000961443	0.00557915	ACTA2	actin alpha 2, smooth muscle	59
ENSG00000260916	226.61	0.84	0.197565	4.24058	2.23e-05	0.000307263	CCPG1	cell cycle progression 1	9236
ENSG00000114796	164.97	0.84	0.206734	4.08117	4.48e-05	0.000532397	KLHL24	kelch like family member 24	54800
ENSG00000182700	115.35	0.84	0.196025	4.28326	1.84e-05	0.000265823	IGIP	IgA inducing protein	492311
ENSG00000198246	69.63	0.84	0.161308	5.20632	1.93e-07	7.13e-06	SLC29A3	solute carrier family 29 member 3	55315
ENSG00000172824	42.66	0.84	0.191038	4.4015	1.08e-05	0.000175712	CES4A	carboxylesterase 4A	283848
ENSG00000235770	40.5	0.84	0.310306	2.72391	0.00645133	0.0246704	LINC00607	long intergenic non-protein coding RNA 607	646324
ENSG00000214900	18.58	0.84	0.203798	4.13658	3.53e-05	0.000441603	LINC01588	long intergenic non-protein coding RNA 1588	283551
ENSG00000221852	18.29	0.84	0.330966	2.55292	0.0106823	0.0364288	KRTAP1-5	keratin associated protein 1-5	83895
ENSG00000259687	17.52	0.84	0.281327	3.00146	0.00268691	0.0124151	NA	NA	NA
ENSG00000266904	10.34	0.84	0.237356	3.53122	0.000413651	0.00294042	NA	NA	NA
ENSG00000102683	7.83	0.84	0.33742	2.49692	0.0125276	0.0410842	SGCG	sarcoglycan gamma	6445
ENSG00000158714	7.8	0.84	0.344522	2.44937	0.0143106	0.0454904	SLAMF8	SLAM family member 8	56833
ENSG00000247157	7.72	0.84	0.342914	2.45363	0.014142	0.0450738	LINC01252	long intergenic non-protein coding RNA 1252	338817
ENSG00000187372	3.46	0.84	0.345992	2.4257	0.0152789	0.0479999	PCDHB13	protocadherin beta 13	56123
ENSG00000006128	2.57	0.84	0.328935	2.73274	0.00628102	0.0241242	TAC1	tachykinin precursor 1	6863
ENSG00000267328	2.56	0.84	0.329764	2.51193	0.0120074	0.0397168	NA	NA	NA
ENSG00000225649	2.19	0.84	0.336483	2.56277	0.0103839	0.0356767	LOC100506474	uncharacterized LOC100506474	100506474
ENSG00000257894	1.44	0.84	0.336174	2.58919	0.00962024	0.033684	NA	NA	NA
ENSG00000266385	1.22	0.84	0.342064	2.37279	0.0176543	0.0538268	NA	NA	NA
ENSG00000235172	0.97	0.84	0.343761	2.48279	0.0130358	0.0423259	LINC01366	long intergenic non-protein coding RNA 1366	257358
ENSG00000267311	0.8	0.84	0.342857	2.45674	0.0140204	0.0448486	NA	NA	NA
ENSG00000019102	0.74	0.84	0.344831	2.43974	0.014698	0.0465206	VSIG2	V-set and immunoglobulin domain containing 2	23584
ENSG00000156219	0.71	0.84	0.318052	2.55599	0.0105886	0.0361927	ART3	ADP-ribosyltransferase 3 (inactive)	419
ENSG00000015413	0.7	0.84	0.339712	2.45496	0.0140899	0.0449791	DPEP1	dipeptidase 1	1800
ENSG00000259627	0.67	0.84	0.322833	2.55058	0.0107543	NA	NA	NA	NA
ENSG00000121797	0.53	0.84	0.332882	2.48779	0.0128538	NA	CCRL2	C-C motif chemokine receptor like 2	9034
ENSG00000079308	3096.64	0.83	0.21228	3.92588	8.64e-05	0.000880751	TNS1	tensin 1	7145
ENSG00000168056	1668.05	0.83	0.139151	5.93792	2.89e-09	2.2e-07	LTBP3	latent transforming growth factor beta binding protein 3	4054
ENSG00000128340	805.55	0.83	0.225777	3.68865	0.000225448	0.00183044	RAC2	Rac family small GTPase 2	5880
ENSG00000188153	598.43	0.83	0.291871	2.86021	0.00423358	0.0177319	COL4A5	collagen type IV alpha 5 chain	1287
ENSG00000187634	342.96	0.83	0.248665	3.34334	0.000827769	0.00496816	SAMD11	sterile alpha motif domain containing 11	148398
ENSG00000136859	208.99	0.83	0.247214	3.36022	0.000778791	0.00475574	ANGPTL2	angiopoietin like 2	23452
ENSG00000205336	188.65	0.83	0.27296	3.0351	0.00240456	0.0114089	ADGRG1	adhesion G protein-coupled receptor G1	9289
ENSG00000165633	181.88	0.83	0.263156	3.13849	0.00169819	0.00869135	VSTM4	V-set and transmembrane domain containing 4	196740
ENSG00000086991	113.47	0.83	0.257966	3.21449	0.00130676	0.00708344	NOX4	NADPH oxidase 4	50507
ENSG00000109944	81.74	0.83	0.226577	3.65053	0.000261696	0.00205493	JHY	junctional cadherin complex regulator	79864
ENSG00000198429	71.19	0.83	0.183976	4.52583	6.02e-06	0.000112237	ZNF69	zinc finger protein 69	7620
ENSG00000131737	53	0.83	0.331205	2.52923	0.0114311	0.0382841	KRT34	keratin 34	3885
ENSG00000162892	47.13	0.83	0.333751	2.50777	0.0121496	0.0400973	IL24	interleukin 24	11009
ENSG00000259886	16.31	0.83	0.242218	3.44048	0.00058068	0.00379769	NA	NA	NA
ENSG00000187942	14.69	0.83	0.251669	3.27334	0.00106283	0.00604183	LDLRAD2	low density lipoprotein receptor class A domain containing 2	401944
ENSG00000105767	9.46	0.83	0.256059	3.23066	0.00123504	0.00679412	CADM4	cell adhesion molecule 4	199731
ENSG00000189283	8.93	0.83	0.286695	2.89264	0.00382023	0.016371	FHIT	fragile histidine triad diadenosine triphosphatase	2272
ENSG00000203327	7.27	0.83	0.267448	3.08977	0.00200313	0.00987157	NA	NA	NA
ENSG00000243953	3.92	0.83	0.292779	2.8255	0.00472075	0.0193431	LOC105374171	uncharacterized LOC105374171	105374171
ENSG00000172350	3.34	0.83	0.32114	2.55432	0.0106395	0.0363299	ABCG4	ATP binding cassette subfamily G member 4	64137
ENSG00000235641	2.47	0.83	0.322991	2.52949	0.011423	0.0382634	NA	NA	NA
ENSG00000253230	2.43	0.83	0.334831	2.58712	0.00967829	0.0338257	MIR124-1HG	MIR124-1 host gene	157627
ENSG00000250829	2.28	0.83	0.345252	2.38965	0.0168644	0.0519283	NA	NA	NA
ENSG00000102032	2.16	0.83	0.345698	2.38257	0.0171924	0.0527489	RENBP	renin binding protein	5973
ENSG00000136275	1.42	0.83	0.34737	2.36067	0.0182422	0.0552192	PKD1L1-AS1	PKD1L1 antisense RNA 1	80099
ENSG00000105122	1.33	0.83	0.343042	2.34422	0.0190671	0.0571389	RASAL3	RAS protein activator like 3	64926
ENSG00000203883	1.16	0.83	0.320923	2.69609	0.0070158	0.0263514	SOX18	SRY-box transcription factor 18	54345
ENSG00000181781	0.98	0.83	0.342501	2.45417	0.0141212	0.0450446	ODF3L2	outer dense fiber of sperm tails 3 like 2	284451
ENSG00000112214	0.97	0.83	0.296733	2.73419	0.00625331	0.0240402	FHL5	four and a half LIM domains 5	9457
ENSG00000146678	0.85	0.83	0.341675	-0.08471	0.932492	0.961175	IGFBP1	insulin like growth factor binding protein 1	3484
ENSG00000127920	2840.38	0.82	0.140824	5.84902	4.94e-09	3.47e-07	GNG11	G protein subunit gamma 11	2791
ENSG00000012822	712.75	0.82	0.192889	4.24945	2.14e-05	0.000299205	CALCOCO1	calcium binding and coiled-coil domain 1	57658
ENSG00000121440	371.06	0.82	0.142262	5.74631	9.12e-09	5.79e-07	PDZRN3	PDZ domain containing ring finger 3	23024
ENSG00000197208	188.81	0.82	0.167943	4.85382	1.21e-06	3.21e-05	SLC22A4	solute carrier family 22 member 4	6583
ENSG00000114841	93.3	0.82	0.177727	4.63445	3.58e-06	7.42e-05	DNAH1	dynein axonemal heavy chain 1	25981
ENSG00000134245	60.28	0.82	0.235459	3.48781	0.000486995	0.00330861	WNT2B	Wnt family member 2B	7482
ENSG00000163449	6.81	0.82	0.300013	2.71811	0.00656561	0.0250275	TMEM169	transmembrane protein 169	92691
ENSG00000239887	5.29	0.82	0.31125	2.61592	0.00889886	0.0316649	C1orf226	chromosome 1 open reading frame 226	400793
ENSG00000250551	3.74	0.82	0.308031	2.62954	0.00855004	0.0307476	NA	NA	NA
ENSG00000188305	2.96	0.82	0.337355	2.40065	0.0163661	0.0507266	PEAK3	PEAK family member 3	374872
ENSG00000113212	2.44	0.82	0.347218	2.35143	0.0187012	0.0562394	PCDHB7	protocadherin beta 7	56129
ENSG00000081842	1.62	0.82	0.330954	2.61849	0.00883209	0.0314913	PCDHA6	protocadherin alpha 6	56142
ENSG00000269289	1.2	0.82	0.334158	2.54096	0.0110548	0.0373092	LOC100505851	uncharacterized LOC100505851	100505851
ENSG00000164035	1.09	0.82	0.304822	2.78492	0.00535406	0.0212902	EMCN	endomucin	51705
ENSG00000233029	1.08	0.82	0.343473	2.36636	0.0179638	0.0545724	LOC100996318	uncharacterized LOC100996318	100996318
ENSG00000133055	0.98	0.82	0.296116	2.74585	0.00603541	0.0234144	MYBPH	myosin binding protein H	4608
ENSG00000261760	0.91	0.82	0.32695	2.52872	0.0114479	0.038307	LOC100507334	two pore channel 3 pseudogene	100507334
ENSG00000165202	0.79	0.82	0.332787	2.46228	0.0138058	0.0443333	OR1Q1	olfactory receptor family 1 subfamily Q member 1	158131
ENSG00000143162	768.1	0.81	0.147917	5.46605	4.6e-08	2.19e-06	CREG1	cellular repressor of E1A stimulated genes 1	8804
ENSG00000105426	738.48	0.81	0.18673	4.32201	1.55e-05	0.000232753	PTPRS	protein tyrosine phosphatase receptor type S	5802
ENSG00000168938	654.32	0.81	0.157616	5.14123	2.73e-07	9.54e-06	PPIC	peptidylprolyl isomerase C	5480
ENSG00000054277	505.42	0.81	0.174812	4.64264	3.44e-06	7.19e-05	OPN3	opsin 3	23596
ENSG00000140450	417.55	0.81	0.203439	3.95901	7.53e-05	0.000790974	ARRDC4	arrestin domain containing 4	91947
ENSG00000171444	249.15	0.81	0.229514	3.52934	0.000416593	0.00295327	MCC	MCC regulator of WNT signaling pathway	4163
ENSG00000243244	224.17	0.81	0.230809	3.52747	0.000419547	0.00296766	STON1	stonin 1	11037
ENSG00000099139	121.82	0.81	0.276743	2.92653	0.00342764	0.0150024	PCSK5	proprotein convertase subtilisin/kexin type 5	5125
ENSG00000204176	100.18	0.81	0.320029	2.55173	0.010719	0.0365281	SYT15	synaptotagmin 15	83849
ENSG00000113504	92.17	0.81	0.259908	3.10993	0.00187133	0.00935375	SLC12A7	solute carrier family 12 member 7	10723
ENSG00000198624	62.95	0.81	0.26627	3.05903	0.00222054	0.0107207	CCDC69	coiled-coil domain containing 69	26112
ENSG00000236345	33.69	0.81	0.257002	3.15383	0.00161144	0.00833827	SCAT8	S-phase cancer associated transcript 8	112935969
ENSG00000137672	30.92	0.81	0.342762	2.38129	0.017252	0.0529017	TRPC6	transient receptor potential cation channel subfamily C member 6	7225
ENSG00000269959	18.5	0.81	0.270289	2.98059	0.00287693	0.0130889	SPACA6-AS1	SPACA6 antisense RNA 1	102238594
ENSG00000130475	11.53	0.81	0.254214	3.16035	0.00157579	0.00818398	FCHO1	FCH and mu domain containing endocytic adaptor 1	23149
ENSG00000235831	3.75	0.81	0.309377	2.58625	0.0097027	0.0338987	BHLHE40-AS1	BHLHE40 antisense RNA 1	100507582
ENSG00000090661	3.49	0.81	0.336307	2.40597	0.0161296	0.0501063	CERS4	ceramide synthase 4	79603
ENSG00000166670	3.45	0.81	0.343269	2.41065	0.0159243	0.0496126	MMP10	matrix metallopeptidase 10	4319
ENSG00000136573	2.65	0.81	0.344785	2.33416	0.0195873	0.0583256	BLK	BLK proto-oncogene, Src family tyrosine kinase	640
ENSG00000251226	2.03	0.81	0.347445	2.31986	0.0203482	0.0601174	LINC02714	long intergenic non-protein coding RNA 2714	729305
ENSG00000159261	1.92	0.81	0.329417	2.60523	0.00918133	0.0324481	CLDN14	claudin 14	23562
ENSG00000236499	1.83	0.81	0.335107	2.3731	0.0176393	0.0537982	LINC00896	long intergenic non-protein coding RNA 896	150197
ENSG00000109625	1.41	0.81	0.343982	2.32821	0.0199011	0.0590956	CPZ	carboxypeptidase Z	8532
ENSG00000249628	1.03	0.81	0.345594	2.34561	0.0189961	0.0569616	LINC00942	long intergenic non-protein coding RNA 942	100292680
ENSG00000237419	0.93	0.81	0.326833	2.52424	0.011595	0.0386899	LOC101928932	uncharacterized LOC101928932	101928932
ENSG00000197587	0.67	0.81	0.316665	2.46354	0.0137573	NA	DMBX1	diencephalon/mesencephalon homeobox 1	127343
ENSG00000123338	0.67	0.81	0.329604	2.4236	0.0153674	NA	NCKAP1L	NCK associated protein 1 like	3071
ENSG00000154611	0.56	0.81	0.31639	2.47404	0.0133595	NA	PSMA8	proteasome 20S subunit alpha 8	143471
ENSG00000131016	16871.5	0.8	0.163944	4.85355	1.21e-06	3.21e-05	AKAP12	A-kinase anchoring protein 12	9590
ENSG00000140937	2342.06	0.8	0.278073	2.89298	0.00381602	0.0163675	CDH11	cadherin 11	1009
ENSG00000138639	932.91	0.8	0.0914979	8.69654	3.42e-18	3.49e-15	ARHGAP24	Rho GTPase activating protein 24	83478
ENSG00000168874	777.77	0.8	0.178492	4.49362	7e-06	0.000127432	ATOH8	atonal bHLH transcription factor 8	84913
ENSG00000184500	485.28	0.8	0.201423	3.94902	7.85e-05	0.000816717	PROS1	protein S	5627
ENSG00000168300	465.03	0.8	0.180548	4.45572	8.36e-06	0.00014464	PCMTD1	protein-L-isoaspartate (D-aspartate) O-methyltransferase domain containing 1	115294
ENSG00000105643	284.67	0.8	0.168844	4.72414	2.31e-06	5.3e-05	ARRDC2	arrestin domain containing 2	27106
ENSG00000033327	199.48	0.8	0.184648	4.33555	1.45e-05	0.000222657	GAB2	GRB2 associated binding protein 2	9846
ENSG00000104870	111.57	0.8	0.24333	3.29846	0.000972173	0.00563632	FCGRT	Fc fragment of IgG receptor and transporter	2217
ENSG00000171316	103.11	0.8	0.264078	3.03216	0.00242812	0.0114952	CHD7	chromodomain helicase DNA binding protein 7	55636
ENSG00000222032	74.95	0.8	0.237838	3.37107	0.000748771	0.00460455	NA	NA	NA
ENSG00000166292	73.6	0.8	0.292851	2.75062	0.00594818	0.0231647	TMEM100	transmembrane protein 100	55273
ENSG00000088899	50.09	0.8	0.159933	5.02652	4.99e-07	1.57e-05	LZTS3	leucine zipper tumor suppressor family member 3	9762
ENSG00000139899	48.07	0.8	0.233969	3.4295	0.000604683	0.00391535	CBLN3	cerebellin 3 precursor	643866
ENSG00000138207	34.81	0.8	0.338086	2.49434	0.0126191	0.0412931	RBP4	retinol binding protein 4	5950
ENSG00000260578	34.17	0.8	0.231861	3.43159	0.00060005	0.00389527	NA	NA	NA
ENSG00000188596	32.9	0.8	0.219155	3.6345	0.000278524	0.00215369	CFAP54	cilia and flagella associated protein 54	144535
ENSG00000155093	31.59	0.8	0.340944	2.35417	0.0185644	0.0559802	PTPRN2	protein tyrosine phosphatase receptor type N2	5799
ENSG00000123700	30.74	0.8	0.339295	2.38362	0.0171435	0.0526192	KCNJ2	potassium inwardly rectifying channel subfamily J member 2	3759
ENSG00000198756	28.99	0.8	0.295978	2.69678	0.00700127	0.0263126	COLGALT2	collagen beta(1-O)galactosyltransferase 2	23127
ENSG00000177599	28.52	0.8	0.211916	3.78535	0.000153495	0.00136697	ZNF491	zinc finger protein 491	126069
ENSG00000159314	26.95	0.8	0.245536	3.26546	0.00109287	0.00617613	ARHGAP27	Rho GTPase activating protein 27	201176
ENSG00000226935	10.94	0.8	0.345683	2.36773	0.0178975	0.0544214	LINC00161	long intergenic non-protein coding RNA 161	118421
ENSG00000232434	6.77	0.8	0.261983	3.04786	0.00230475	0.0110168	AJM1	apical junction component 1 homolog	389813
ENSG00000163749	2.49	0.8	0.3382	2.43377	0.0149426	0.0471492	CCDC158	coiled-coil domain containing 158	339965
ENSG00000163673	2.44	0.8	0.315557	2.86719	0.00414131	0.0174276	DCLK3	doublecortin like kinase 3	85443
ENSG00000175315	2.42	0.8	0.32938	2.38729	0.0169732	0.0521714	CST6	cystatin E/M	1474
ENSG00000197859	1.24	0.8	0.301012	2.83478	0.00458569	0.0188983	ADAMTSL2	ADAMTS like 2	9719
ENSG00000269054	1	0.8	0.3469	2.2526	0.0242846	0.0687915	NA	NA	NA
ENSG00000178734	0.86	0.8	0.344017	0.518884	0.603842	0.736966	LMO7DN	LMO7 downstream neighbor	729420
ENSG00000124507	0.63	0.8	0.338982	2.3284	0.0198907	NA	PACSIN1	protein kinase C and casein kinase substrate in neurons 1	29993
ENSG00000135480	3945.08	0.79	0.288422	2.74851	0.00598668	0.0232723	KRT7	keratin 7	3855
ENSG00000121068	571.57	0.79	0.23589	3.33896	0.000840918	0.0050218	TBX2	T-box transcription factor 2	6909
ENSG00000125354	234.05	0.79	0.170212	4.6278	3.7e-06	7.62e-05	SEPTIN6	septin 6	23157
ENSG00000179163	104.2	0.79	0.200873	3.92411	8.71e-05	0.000884947	FUCA1	alpha-L-fucosidase 1	2517
ENSG00000147394	92.69	0.79	0.195674	4.01715	5.89e-05	0.000654849	ZNF185	zinc finger protein 185 with LIM domain	7739
ENSG00000165617	79.6	0.79	0.294967	2.66579	0.00768086	0.0283038	DACT1	dishevelled binding antagonist of beta catenin 1	51339
ENSG00000171291	63.27	0.79	0.239243	3.29029	0.00100084	0.00576436	ZNF439	zinc finger protein 439	90594
ENSG00000272476	44.99	0.79	0.181554	4.36193	1.29e-05	0.000202958	NA	NA	NA
ENSG00000116141	25.06	0.79	0.318259	2.47174	0.0134459	0.043387	MARK1	microtubule affinity regulating kinase 1	4139
ENSG00000233593	19.97	0.79	0.165532	4.74441	2.09e-06	4.9e-05	LINC02609	long intergenic non-protein coding RNA 2609	105378853
ENSG00000099260	12.1	0.79	0.341888	2.39816	0.0164777	0.0509667	PALMD	palmdelphin	54873
ENSG00000066185	4.6	0.79	0.29998	2.61304	0.00897402	0.0318616	ZMYND12	zinc finger MYND-type containing 12	84217
ENSG00000264672	2.1	0.79	0.338382	2.31196	0.0207796	0.0611572	SEPTIN4-AS1	SEPTIN4 antisense RNA 1	101927688
ENSG00000187173	1.98	0.79	0.301296	3.12304	0.00178992	0.00904068	LCE2A	late cornified envelope 2A	353139
ENSG00000110375	1.98	0.79	0.324925	2.40127	0.0163381	0.0506641	UPK2	uroplakin 2	7379
ENSG00000126264	1.89	0.79	0.340408	2.29476	0.0217466	0.0632682	HCST	hematopoietic cell signal transducer	10870
ENSG00000017427	1.68	0.79	0.330357	2.47691	0.0132526	0.0428923	IGF1	insulin like growth factor 1	3479
ENSG00000230733	1.27	0.79	0.347069	2.24626	0.0246874	0.0696252	NA	NA	NA
ENSG00000248483	1.23	0.79	0.346614	2.21824	0.0265384	0.0735739	POU5F2	POU domain class 5, transcription factor 2	134187
ENSG00000231246	1.15	0.79	0.346267	2.25568	0.0240906	0.0683525	LINC02884	long intergenic non-protein coding RNA 2884	105378909
ENSG00000269220	0.86	0.79	0.3052	2.53381	0.0112829	0.0378929	LINC00528	long intergenic non-protein coding RNA 528	200298
ENSG00000234396	0.85	0.79	0.344856	2.32551	0.0200445	0.0593748	NA	NA	NA
ENSG00000009765	0.62	0.79	0.331615	2.35697	0.0184247	NA	IYD	iodotyrosine deiodinase	389434
ENSG00000107984	8320.97	0.78	0.23105	3.36382	0.00076871	0.00470163	DKK1	dickkopf WNT signaling pathway inhibitor 1	22943
ENSG00000138448	7579.29	0.78	0.14378	5.39501	6.85e-08	3.05e-06	ITGAV	integrin subunit alpha V	3685
ENSG00000182534	2794.96	0.78	0.166186	4.69822	2.62e-06	5.83e-05	MXRA7	matrix remodeling associated 7	439921
ENSG00000172667	2631.76	0.78	0.124164	6.26536	3.72e-10	4.05e-08	ZMAT3	zinc finger matrin-type 3	64393
ENSG00000119938	1312.36	0.78	0.212295	3.68009	0.000233152	0.00188302	PPP1R3C	protein phosphatase 1 regulatory subunit 3C	5507
ENSG00000041353	675.62	0.78	0.259352	3.0001	0.00269889	0.0124459	RAB27B	RAB27B, member RAS oncogene family	5874
ENSG00000102312	586.28	0.78	0.190517	4.0882	4.35e-05	0.000521519	PORCN	porcupine O-acyltransferase	64840
ENSG00000162520	565.53	0.78	0.259484	2.99525	0.0027422	0.0126011	SYNC	syncoilin, intermediate filament protein	81493
ENSG00000077585	162.91	0.78	0.135966	5.74596	9.14e-09	5.79e-07	GPR137B	G protein-coupled receptor 137B	7107
ENSG00000206052	110.66	0.78	0.286559	2.73165	0.00630175	0.0241978	DOK6	docking protein 6	220164
ENSG00000106992	96.47	0.78	0.149507	5.22386	1.75e-07	6.56e-06	AK1	adenylate kinase 1	203
ENSG00000182568	77.98	0.78	0.267349	2.93026	0.00338676	0.0148675	SATB1	SATB homeobox 1	6304
ENSG00000257354	25.5	0.78	0.205785	3.78737	0.000152248	0.00135964	NA	NA	NA
ENSG00000177614	20.65	0.78	0.329526	2.38626	0.0170209	0.0523013	PGBD5	piggyBac transposable element derived 5	79605
ENSG00000250091	20.36	0.78	0.212911	3.65456	0.000257627	0.00202877	NA	NA	NA
ENSG00000259828	14.65	0.78	0.318056	2.45008	0.0142823	0.0454307	NA	NA	NA
ENSG00000163072	11.88	0.78	0.234052	3.32329	0.000889613	0.00524303	NOSTRIN	nitric oxide synthase trafficking	115677
ENSG00000233058	10.51	0.78	0.255508	3.04321	0.00234068	0.0111636	NA	NA	NA
ENSG00000224950	10.39	0.78	0.241584	3.20225	0.00136361	0.00731045	NA	NA	NA
ENSG00000162723	7	0.78	0.347129	2.29174	0.0219205	0.0636299	SLAMF9	SLAM family member 9	89886
ENSG00000009694	6.66	0.78	0.334664	2.45578	0.014058	0.0449248	TENM1	teneurin transmembrane protein 1	10178
ENSG00000108381	6.56	0.78	0.300981	2.57997	0.00988091	0.0343654	ASPA	aspartoacylase	443
ENSG00000271788	3.96	0.78	0.283096	2.74339	0.00608086	0.0235493	NA	NA	NA
ENSG00000163467	2.94	0.78	0.318602	2.43922	0.0147189	0.0465579	TSACC	TSSK6 activating cochaperone	128229
ENSG00000258088	2.78	0.78	0.332713	2.32781	0.0199225	0.0591393	NA	NA	NA
ENSG00000008226	2.64	0.78	0.338707	2.28987	0.0220288	0.063877	DLEC1	DLEC1 cilia and flagella associated protein	9940
ENSG00000168961	2.5	0.78	0.341913	2.2551	0.0241269	0.0684454	LGALS9	galectin 9	3965
ENSG00000242221	1.99	0.78	0.304177	2.98968	0.0027927	0.0127891	PSG2	pregnancy specific beta-1-glycoprotein 2	5670
ENSG00000226453	1.34	0.78	0.346706	2.20674	0.027332	0.0752216	NA	NA	NA
ENSG00000272625	1.3	0.78	0.346037	2.23509	0.0254116	0.0711569	NA	NA	NA
ENSG00000174502	1.08	0.78	0.33646	2.39875	0.016451	0.0509158	SLC26A9	solute carrier family 26 member 9	115019
ENSG00000267131	1.01	0.78	0.347464	2.19157	0.0284108	0.0773746	LOC101927855	uncharacterized LOC101927855	101927855
ENSG00000216490	0.99	0.78	0.345425	2.24966	0.0244708	0.0691561	IFI30	IFI30 lysosomal thiol reductase	10437
ENSG00000130234	0.89	0.78	0.342722	2.2975	0.0215903	0.0629563	ACE2	angiotensin converting enzyme 2	59272
ENSG00000203849	0.84	0.78	0.338472	2.35618	0.0184637	0.0556949	NA	NA	NA
ENSG00000095303	5196.67	0.77	0.210987	3.63692	0.000275918	0.00214129	PTGS1	prostaglandin-endoperoxide synthase 1	5742
ENSG00000140545	2656.69	0.77	0.224243	3.42626	0.00061195	0.00395253	MFGE8	milk fat globule EGF and factor V/VIII domain containing	4240
ENSG00000198189	564.15	0.77	0.119424	6.43738	1.22e-10	1.53e-08	HSD17B11	hydroxysteroid 17-beta dehydrogenase 11	51170
ENSG00000170485	453.64	0.77	0.229718	3.33893	0.000841019	0.0050218	NPAS2	neuronal PAS domain protein 2	4862
ENSG00000231290	293.59	0.77	0.290642	2.64565	0.00815333	0.0296588	APCDD1L-DT	APCDD1L divergent transcript	149773
ENSG00000143842	270.06	0.77	0.120433	6.3921	1.64e-10	1.99e-08	SOX13	SRY-box transcription factor 13	9580
ENSG00000064042	243.8	0.77	0.343976	2.25035	0.0244268	0.0691027	LIMCH1	LIM and calponin homology domains 1	22998
ENSG00000119686	216.41	0.77	0.268761	2.87886	0.00399115	0.0169562	FLVCR2	FLVCR heme transporter 2	55640
ENSG00000104213	148.03	0.77	0.327604	2.36043	0.0182537	0.0552343	PDGFRL	platelet derived growth factor receptor like	5157
ENSG00000134242	91.23	0.77	0.273962	2.81271	0.00491253	0.0199506	PTPN22	protein tyrosine phosphatase non-receptor type 22	26191
ENSG00000196605	89.11	0.77	0.168819	4.58485	4.54e-06	9.02e-05	ZNF846	zinc finger protein 846	162993
ENSG00000189134	54.7	0.77	0.158453	4.82997	1.37e-06	3.5e-05	NKAPL	NFKB activating protein like	222698
ENSG00000213088	37.94	0.77	0.333281	2.30882	0.0209535	0.0615092	ACKR1	atypical chemokine receptor 1 (Duffy blood group)	2532
ENSG00000132965	19.88	0.77	0.314283	2.45945	0.0139151	0.044584	ALOX5AP	arachidonate 5-lipoxygenase activating protein	241
ENSG00000228560	16.21	0.77	0.344158	2.26467	0.0235332	0.067147	NA	NA	NA
ENSG00000148541	14.23	0.77	0.306599	2.50204	0.0123478	0.0406194	FAM13C	family with sequence similarity 13 member C	220965
ENSG00000205517	13.84	0.77	0.245911	3.12247	0.0017934	0.00905009	RGL3	ral guanine nucleotide dissociation stimulator like 3	57139
ENSG00000178752	13.63	0.77	0.227464	3.38399	0.000714408	0.00445889	ERFE	erythroferrone	151176
ENSG00000010310	6.09	0.77	0.283359	2.71563	0.00661495	0.0251543	GIPR	gastric inhibitory polypeptide receptor	2696
ENSG00000228709	4.41	0.77	0.342894	2.26387	0.0235824	0.0672111	NA	NA	NA
ENSG00000167676	3.46	0.77	0.337097	2.35688	0.0184291	0.0556166	PLIN4	perilipin 4	729359
ENSG00000163017	3.46	0.77	0.336712	1.31127	0.189767	0.327547	ACTG2	actin gamma 2, smooth muscle	72
ENSG00000204179	2.41	0.77	0.346356	2.22175	0.0263004	0.0730403	PTPN20	protein tyrosine phosphatase non-receptor type 20	26095
ENSG00000233030	2.11	0.77	0.336529	2.37141	0.0177203	0.0539939	NA	NA	NA
ENSG00000178636	2.06	0.77	0.339807	2.22804	0.0258779	0.0721791	NA	NA	NA
ENSG00000120645	2.02	0.77	0.346918	2.23509	0.0254114	0.0711569	IQSEC3	IQ motif and Sec7 domain ArfGEF 3	440073
ENSG00000104888	1.77	0.77	0.347448	2.21065	0.0270601	0.0745905	SLC17A7	solute carrier family 17 member 7	57030
ENSG00000025039	1.58	0.77	0.339984	2.21803	0.0265526	0.073592	RRAGD	Ras related GTP binding D	58528
ENSG00000117560	1.56	0.77	0.345965	2.19146	0.0284184	0.0773819	FASLG	Fas ligand	356
ENSG00000162267	1.41	0.77	0.295096	2.86144	0.00421728	0.0176828	ITIH3	inter-alpha-trypsin inhibitor heavy chain 3	3699
ENSG00000150681	1.33	0.77	0.332164	2.37687	0.0174601	0.0534206	RGS18	regulator of G protein signaling 18	64407
ENSG00000158816	0.9	0.77	0.313042	2.47865	0.0131879	0.0427331	VWA5B1	von Willebrand factor A domain containing 5B1	127731
ENSG00000270823	0.72	0.77	0.341235	2.25333	0.0242382	0.0686734	NA	NA	NA
ENSG00000156920	0.55	0.77	0.336312	2.272	0.0230867	NA	ADGRG4	adhesion G protein-coupled receptor G4	139378
ENSG00000168140	1773.33	0.76	0.139947	5.45721	4.84e-08	2.29e-06	VASN	vasorin	114990
ENSG00000005238	535.16	0.76	0.155472	4.86857	1.12e-06	3.01e-05	FAM214B	family with sequence similarity 214 member B	80256
ENSG00000123977	449.86	0.76	0.263671	2.90051	0.00372552	0.0160508	DAW1	dynein assembly factor with WD repeats 1	164781
ENSG00000060656	245.09	0.76	0.238551	3.19616	0.00139268	0.00742786	PTPRU	protein tyrosine phosphatase receptor type U	10076
ENSG00000168016	228.67	0.76	0.24045	3.14131	0.00168195	0.00863482	TRANK1	tetratricopeptide repeat and ankyrin repeat containing 1	9881
ENSG00000198300	51.3	0.76	0.338377	2.25765	0.0239672	0.0681028	PEG3	paternally expressed 3	5178
ENSG00000061918	38.25	0.76	0.263317	2.89287	0.00381743	0.0163699	GUCY1B1	guanylate cyclase 1 soluble subunit beta 1	2983
ENSG00000261327	37.13	0.76	0.282858	2.69027	0.00713936	0.0266967	NA	NA	NA
ENSG00000139410	30.09	0.76	0.169549	4.47535	7.63e-06	0.000135002	SDSL	serine dehydratase like	113675
ENSG00000272780	9.83	0.76	0.272077	2.79012	0.00526889	0.0210253	NA	NA	NA
ENSG00000235387	8.77	0.76	0.25284	2.99008	0.00278906	0.0127767	SPAAR	small regulatory polypeptide of amino acid response	158376
ENSG00000271882	8.32	0.76	0.241696	3.13748	0.00170405	0.00871027	NA	NA	NA
ENSG00000118785	4.84	0.76	0.309835	2.44957	0.0143026	0.0454726	SPP1	secreted phosphoprotein 1	6696
ENSG00000142623	3.69	0.76	0.330864	2.30241	0.021312	0.0622958	PADI1	peptidyl arginine deiminase 1	29943
ENSG00000140519	3.34	0.76	0.320715	2.60722	0.00912796	0.0322891	RHCG	Rh family C glycoprotein	51458
ENSG00000242550	3.22	0.76	0.324236	2.51486	0.0119081	0.0394719	SERPINB10	serpin family B member 10	5273
ENSG00000243008	2.77	0.76	0.3227	2.3261	0.0200131	0.0593165	NA	NA	NA
ENSG00000178776	2.55	0.76	0.346977	2.18792	0.0286753	0.0779162	C5orf46	chromosome 5 open reading frame 46	389336
ENSG00000168421	2.46	0.76	0.347452	2.19134	0.0284275	0.0773958	RHOH	ras homolog family member H	399
ENSG00000237413	2.08	0.76	0.345519	2.18628	0.0287955	0.0781358	MGC27382	uncharacterized MGC27382	149047
ENSG00000042980	2.07	0.76	0.329441	2.27339	0.0230025	0.0659847	ADAM28	ADAM metallopeptidase domain 28	10863
ENSG00000221878	1.93	0.76	0.345703	2.22194	0.0262874	0.0730308	PSG7	pregnancy specific beta-1-glycoprotein 7	5676
ENSG00000169918	1.79	0.76	0.343285	2.18319	0.029022	0.0785479	OTUD7A	OTU deubiquitinase 7A	161725
ENSG00000264116	1.66	0.76	0.335033	2.22026	0.0264013	0.073257	NA	NA	NA
ENSG00000256482	1.3	0.76	0.346212	2.14447	0.0319953	0.0845972	NA	NA	NA
ENSG00000250889	1.04	0.76	0.347457	2.14159	0.0322266	0.08507	NA	NA	NA
ENSG00000109758	0.87	0.76	0.343041	2.24335	0.0248742	0.0699981	HGFAC	HGF activator	3083
ENSG00000127903	0.8	0.76	0.337911	2.28192	0.0224942	0.0649039	ZNF835	zinc finger protein 835	90485
ENSG00000181790	0.79	0.76	0.327605	2.33277	0.0196604	0.0585254	ADGRB1	adhesion G protein-coupled receptor B1	575
ENSG00000127324	0.56	0.76	0.300276	1.50414	0.132544	NA	TSPAN8	tetraspanin 8	7103
ENSG00000166825	26100.8	0.75	0.133162	5.66695	1.45e-08	8.35e-07	ANPEP	alanyl aminopeptidase, membrane	290
ENSG00000223380	4519.78	0.75	0.11841	6.31411	2.72e-10	3.11e-08	NA	NA	NA
ENSG00000162407	3573.48	0.75	0.245488	3.06413	0.00218302	0.0106015	PLPP3	phospholipid phosphatase 3	8613
ENSG00000170581	1389.34	0.75	0.171894	4.35192	1.35e-05	0.000210055	STAT2	signal transducer and activator of transcription 2	6773
ENSG00000198796	868.06	0.75	0.234506	3.21161	0.00131996	0.0071389	ALPK2	alpha kinase 2	115701
ENSG00000261801	248.16	0.75	0.234671	3.19543	0.00139621	0.00743914	LOXL1-AS1	LOXL1 antisense RNA 1	100287616
ENSG00000130517	238.22	0.75	0.17671	4.26751	1.98e-05	0.00028102	PGPEP1	pyroglutamyl-peptidase I	54858
ENSG00000169231	202.01	0.75	0.198812	3.75208	0.000175374	0.00151283	THBS3	thrombospondin 3	7059
ENSG00000106003	75.37	0.75	0.245664	3.05636	0.00224042	0.0107762	LFNG	LFNG O-fucosylpeptide 3-beta-N-acetylglucosaminyltransferase	3955
ENSG00000155511	69.09	0.75	0.275627	2.72606	0.00640955	0.0245493	GRIA1	glutamate ionotropic receptor AMPA type subunit 1	2890
ENSG00000157873	55.66	0.75	0.213678	3.51597	0.000438155	0.00306204	TNFRSF14	TNF receptor superfamily member 14	8764
ENSG00000121104	46.45	0.75	0.161292	4.65395	3.26e-06	6.91e-05	FAM117A	family with sequence similarity 117 member A	81558
ENSG00000095627	41.89	0.75	0.347045	2.20201	0.0276649	0.0758667	TDRD1	tudor domain containing 1	56165
ENSG00000130653	36.12	0.75	0.217731	3.44909	0.000562472	0.00370758	PNPLA7	patatin like phospholipase domain containing 7	375775
ENSG00000145040	31.23	0.75	0.231938	3.23918	0.00119872	0.00664371	UCN2	urocortin 2	90226
ENSG00000182578	29.56	0.75	0.276267	2.71665	0.00659465	0.0250985	CSF1R	colony stimulating factor 1 receptor	1436
ENSG00000234810	19.65	0.75	0.294354	2.55155	0.0107244	0.0365335	NA	NA	NA
ENSG00000254554	10.46	0.75	0.210089	3.5742	0.000351298	0.00257476	NA	NA	NA
ENSG00000250320	7.52	0.75	0.345203	2.19753	0.0279826	0.0765199	NA	NA	NA
ENSG00000123364	7.29	0.75	0.343634	2.19442	0.0282055	0.0769546	HOXC13	homeobox C13	3229
ENSG00000266010	7.06	0.75	0.269296	2.79211	0.00523652	0.0209269	GATA6-AS1	GATA6 antisense RNA 1 (head to head)	100128893
ENSG00000189045	3.25	0.75	0.332487	2.2499	0.0244553	0.0691427	ANKDD1B	ankyrin repeat and death domain containing 1B	728780
ENSG00000196566	2.73	0.75	0.337227	2.22315	0.0262055	0.0728818	NA	NA	NA
ENSG00000251314	2.43	0.75	0.334967	2.22039	0.0263921	0.0732422	LOC101929710	uncharacterized LOC101929710	101929710
ENSG00000142530	2.26	0.75	0.319949	2.32711	0.0199592	0.0592043	FAM71E1	family with sequence similarity 71 member E1	112703
ENSG00000248898	1.12	0.75	0.339402	2.2598	0.0238337	0.0677935	NA	NA	NA
ENSG00000260475	0.88	0.75	0.347435	2.16125	0.0306759	0.0819642	NA	NA	NA
ENSG00000232079	0.67	0.75	0.297249	2.37458	0.0175689	NA	LINC01697	long intergenic non-protein coding RNA 1697	284825
ENSG00000109943	0.62	0.75	0.329654	2.24625	0.0246878	NA	CRTAM	cytotoxic and regulatory T cell molecule	56253
ENSG00000245768	0.59	0.75	0.342327	2.20821	0.0272294	NA	NA	NA	NA
ENSG00000158290	14875.9	0.74	0.120718	6.12045	9.33e-10	8.64e-08	CUL4B	cullin 4B	8450
ENSG00000163739	1803.98	0.74	0.295364	2.50689	0.0121798	0.0401765	CXCL1	C-X-C motif chemokine ligand 1	2919
ENSG00000183722	1332.77	0.74	0.155633	4.74907	2.04e-06	4.81e-05	LHFPL6	LHFPL tetraspan subfamily member 6	10186
ENSG00000225830	536.77	0.74	0.20751	3.5881	0.000333102	0.00247436	ERCC6	ERCC excision repair 6, chromatin remodeling factor	2074
ENSG00000105419	494.44	0.74	0.139887	5.2602	1.44e-07	5.54e-06	MEIS3	Meis homeobox 3	56917
ENSG00000137767	475.09	0.74	0.176937	4.18943	2.8e-05	0.000368043	SQOR	sulfide quinone oxidoreductase	58472
ENSG00000130158	380.63	0.74	0.144151	5.13648	2.8e-07	9.76e-06	DOCK6	dedicator of cytokinesis 6	57572
ENSG00000129675	222.35	0.74	0.225615	3.29644	0.000979182	0.00566544	ARHGEF6	Rac/Cdc42 guanine nucleotide exchange factor 6	9459
ENSG00000171680	189.5	0.74	0.181056	4.09427	4.23e-05	0.000510898	PLEKHG5	pleckstrin homology and RhoGEF domain containing G5	57449
ENSG00000169933	157.93	0.74	0.220852	3.36841	0.000756039	0.00464183	FRMPD4	FERM and PDZ domain containing 4	9758
ENSG00000139679	100.66	0.74	0.194317	3.7966	0.000146693	0.00132478	LPAR6	lysophosphatidic acid receptor 6	10161
ENSG00000108176	66.49	0.74	0.211531	3.51845	0.000434074	0.00304026	DNAJC12	DnaJ heat shock protein family (Hsp40) member C12	56521
ENSG00000204947	58.69	0.74	0.182625	4.05646	4.98e-05	0.000576148	ZNF425	zinc finger protein 425	155054
ENSG00000115009	32.69	0.74	0.281108	2.64002	0.00829004	0.0300653	CCL20	C-C motif chemokine ligand 20	6364
ENSG00000095397	31.43	0.74	0.247296	3.00722	0.00263649	0.0122369	WHRN	whirlin	25861
ENSG00000072201	23.77	0.74	0.23279	3.17963	0.00147464	0.00777029	LNX1	ligand of numb-protein X 1	84708
ENSG00000224167	21.35	0.74	0.203172	3.65902	0.000253183	0.00200389	NA	NA	NA
ENSG00000267481	18.19	0.74	0.199476	3.69034	0.000223955	0.00182128	NA	NA	NA
ENSG00000243587	11.65	0.74	0.211888	3.50637	0.000454268	0.00313606	NA	NA	NA
ENSG00000241644	10.2	0.74	0.300607	2.46859	0.0135648	0.0436895	INMT	indolethylamine N-methyltransferase	11185
ENSG00000237813	9.18	0.74	0.278118	2.66388	0.00772454	0.0284375	NA	NA	NA
ENSG00000272468	8.84	0.74	0.249846	2.93373	0.00334917	0.0147462	NA	NA	NA
ENSG00000224251	7.94	0.74	0.286836	2.56832	0.0102193	0.0352494	NA	NA	NA
ENSG00000167914	3	0.74	0.347335	2.12875	0.0332745	0.0872606	GSDMA	gasdermin A	284110
ENSG00000068615	2.76	0.74	0.307231	2.37704	0.0174524	0.0534056	REEP1	receptor accessory protein 1	65055
ENSG00000255252	2.56	0.74	0.323121	2.28132	0.0225294	0.0649859	NA	NA	NA
ENSG00000168959	2.14	0.74	0.329351	2.21272	0.026917	0.0743452	GRM5	glutamate metabotropic receptor 5	2915
ENSG00000204963	1.87	0.74	0.342445	2.19574	0.0281104	0.0767393	PCDHA7	protocadherin alpha 7	56141
ENSG00000226659	1.4	0.74	0.327445	2.36104	0.0182236	0.0551866	TSPAN14-AS1	TSPAN14 antisense RNA 1	101929574
ENSG00000234199	1.4	0.74	0.339251	2.12965	0.0332009	0.0871507	LINC01191	long intergenic non-protein coding RNA 1191	440900
ENSG00000144229	1.31	0.74	0.308288	2.59202	0.00954133	0.0334746	THSD7B	thrombospondin type 1 domain containing 7B	80731
ENSG00000244414	1.28	0.74	0.338017	2.19841	0.0279199	0.0763811	CFHR1	complement factor H related 1	3078
ENSG00000135547	1.06	0.74	0.33554	2.30659	0.0210777	0.0617797	HEY2	hes related family bHLH transcription factor with YRPW motif 2	23493
ENSG00000103056	0.94	0.74	0.338207	2.22436	0.0261243	0.072719	SMPD3	sphingomyelin phosphodiesterase 3	55512
ENSG00000163060	0.78	0.74	0.336235	2.19625	0.0280739	0.0766934	TEKT4	tektin 4	150483
ENSG00000130508	8326.11	0.73	0.164309	4.4722	7.74e-06	0.000136474	PXDN	peroxidasin	7837
ENSG00000119927	3030.93	0.73	0.231549	3.16204	0.00156668	0.00814377	GPAM	glycerol-3-phosphate acyltransferase, mitochondrial	57678
ENSG00000148677	1484.01	0.73	0.342635	2.14103	0.0322714	0.085152	ANKRD1	ankyrin repeat domain 1	27063
ENSG00000139329	1369.54	0.73	0.260395	2.79404	0.0052054	0.0208444	LUM	lumican	4060
ENSG00000118922	1280.82	0.73	0.149065	4.90724	9.24e-07	2.56e-05	KLF12	Kruppel like factor 12	11278
ENSG00000091490	843.64	0.73	0.203056	3.61392	0.000301602	0.00229165	SEL1L3	SEL1L family member 3	23231
ENSG00000071282	586.44	0.73	0.183955	3.96849	7.23e-05	0.000766437	LMCD1	LIM and cysteine rich domains 1	29995
ENSG00000011105	293.23	0.73	0.134825	5.40747	6.39e-08	2.88e-06	TSPAN9	tetraspanin 9	10867
ENSG00000273131	254.34	0.73	0.144831	5.02826	4.95e-07	1.56e-05	NA	NA	NA
ENSG00000144857	118.4	0.73	0.273262	2.67206	0.00753863	0.0278742	BOC	BOC cell adhesion associated, oncogene regulated	91653
ENSG00000167703	67.29	0.73	0.243352	3.00654	0.00264243	0.0122539	SLC43A2	solute carrier family 43 member 2	124935
ENSG00000119922	52.4	0.73	0.271382	2.69519	0.00703481	0.0264083	IFIT2	interferon induced protein with tetratricopeptide repeats 2	3433
ENSG00000197380	35.41	0.73	0.235805	3.0815	0.00205959	0.0101084	DACT3	dishevelled binding antagonist of beta catenin 3	147906
ENSG00000258777	28.78	0.73	0.238726	3.07177	0.00212793	0.0103856	HIF1A-AS1	HIF1A antisense RNA 1	100750246
ENSG00000135636	20.77	0.73	0.346107	2.13694	0.0326026	0.0859315	DYSF	dysferlin	8291
ENSG00000244300	15.1	0.73	0.29208	2.506	0.0122106	0.0402562	NA	NA	NA
ENSG00000254602	14.91	0.73	0.272162	2.69495	0.00703991	0.0264172	NA	NA	NA
ENSG00000261553	11.89	0.73	0.246266	2.95448	0.00313194	0.0139751	NA	NA	NA
ENSG00000089163	7.84	0.73	0.231847	3.12319	0.00178904	0.00903934	SIRT4	sirtuin 4	23409
ENSG00000236548	7.14	0.73	0.268511	2.71778	0.00657224	0.0250475	RNF217-AS1	RNF217 antisense RNA 1 (head to head)	7955
ENSG00000081148	6.87	0.73	0.295589	2.45282	0.0141742	0.0451463	IMPG2	interphotoreceptor matrix proteoglycan 2	50939
ENSG00000231672	4.13	0.73	0.327324	2.21487	0.026769	0.0740303	NA	NA	NA
ENSG00000255346	3.96	0.73	0.328087	2.22255	0.026246	0.0729629	NOX5	NADPH oxidase 5	79400
ENSG00000143333	3.79	0.73	0.347264	2.10774	0.0350533	0.0906537	RGS16	regulator of G protein signaling 16	6004
ENSG00000269946	3.66	0.73	0.303825	2.37302	0.0176434	0.0538021	NA	NA	NA
ENSG00000124249	3.66	0.73	0.330414	2.19574	0.0281106	0.0767393	KCNK15	potassium two pore domain channel subfamily K member 15	60598
ENSG00000239677	2.73	0.73	0.340986	2.13176	0.0330265	0.0868349	NA	NA	NA
ENSG00000260971	1.84	0.73	0.344841	2.08208	0.0373355	0.0952762	NA	NA	NA
ENSG00000136541	1.65	0.73	0.301569	2.74269	0.00609385	0.0235889	ERMN	ermin	57471
ENSG00000233085	1.65	0.73	0.340179	2.1057	0.0352303	0.090977	NA	NA	NA
ENSG00000106852	1.28	0.73	0.341958	2.08738	0.0368539	0.0942344	LHX6	LIM homeobox 6	26468
ENSG00000223393	1.14	0.73	0.347346	2.07573	0.0379192	0.096548	NA	NA	NA
ENSG00000225498	1	0.73	0.32505	2.32995	0.0198087	0.0588847	NA	NA	NA
ENSG00000129951	0.92	0.73	0.328125	2.27323	0.0230125	0.0659938	PLPPR3	phospholipid phosphatase related 3	79948
ENSG00000227355	0.61	0.73	0.299354	2.30495	0.0211692	NA	NA	NA	NA
ENSG00000166923	21434.3	0.72	0.282257	2.55095	0.0107431	0.0365687	GREM1	gremlin 1, DAN family BMP antagonist	26585
ENSG00000205542	7746.01	0.72	0.123559	5.85839	4.67e-09	3.35e-07	TMSB4X	thymosin beta 4 X-linked	7114
ENSG00000124762	4110.65	0.72	0.12013	6.0295	1.64e-09	1.34e-07	CDKN1A	cyclin dependent kinase inhibitor 1A	1026
ENSG00000071967	2570.47	0.72	0.196337	3.66215	0.000250112	0.00198502	CYBRD1	cytochrome b reductase 1	79901
ENSG00000168487	1983.59	0.72	0.164176	4.3681	1.25e-05	0.00019894	BMP1	bone morphogenetic protein 1	649
ENSG00000158828	1065.72	0.72	0.142063	5.04438	4.55e-07	1.44e-05	PINK1	PTEN induced kinase 1	65018
ENSG00000182326	997.02	0.72	0.231349	3.12064	0.00180457	0.00909237	C1S	complement C1s	716
ENSG00000241839	392.09	0.72	0.129564	5.58727	2.31e-08	1.22e-06	PLEKHO2	pleckstrin homology domain containing O2	80301
ENSG00000113805	307.73	0.72	0.268512	2.66622	0.00767094	0.0282726	CNTN3	contactin 3	5067
ENSG00000214021	305.82	0.72	0.157778	4.55072	5.35e-06	0.00010222	TTLL3	tubulin tyrosine ligase like 3	26140
ENSG00000095752	282.38	0.72	0.327082	2.22272	0.0262347	0.0729419	IL11	interleukin 11	3589
ENSG00000131634	226.5	0.72	0.321315	2.23786	0.0252301	0.0707824	TMEM204	transmembrane protein 204	79652
ENSG00000101986	214.32	0.72	0.166727	4.34631	1.38e-05	0.000214521	ABCD1	ATP binding cassette subfamily D member 1	215
ENSG00000182319	163.6	0.72	0.226554	3.19821	0.00138281	0.00738752	NA	NA	NA
ENSG00000157111	160.91	0.72	0.228916	3.14852	0.00164103	0.00845273	TMEM171	transmembrane protein 171	134285
ENSG00000115828	121.68	0.72	0.288611	2.49788	0.0124939	0.0409949	QPCT	glutaminyl-peptide cyclotransferase	25797
ENSG00000273388	117.13	0.72	0.315938	2.27418	0.0229554	0.0659088	NA	NA	NA
ENSG00000144115	116.5	0.72	0.33008	2.1961	0.0280851	0.0767092	THNSL2	threonine synthase like 2	55258
ENSG00000175600	108.28	0.72	0.171918	4.18216	2.89e-05	0.00037743	SUGCT	succinyl-CoA:glutarate-CoA transferase	79783
ENSG00000154589	87.67	0.72	0.165663	4.34642	1.38e-05	0.000214521	LY96	lymphocyte antigen 96	23643
ENSG00000158373	67.53	0.72	0.196136	3.65069	0.00026154	0.00205455	H2BC5	H2B clustered histone 5	3017
ENSG00000117791	59.54	0.72	0.172722	4.15939	3.19e-05	0.000408325	MTARC2	mitochondrial amidoxime reducing component 2	54996
ENSG00000102524	29.6	0.72	0.210289	3.42424	0.000616528	0.00396908	TNFSF13B	TNF superfamily member 13b	10673
ENSG00000171840	24.94	0.72	0.197618	3.63813	0.000274629	0.00213558	NINJ2	ninjurin 2	4815
ENSG00000145777	16.88	0.72	0.305862	2.36529	0.0180161	0.0547045	TSLP	thymic stromal lymphopoietin	85480
ENSG00000156042	12.79	0.72	0.250495	2.86068	0.00422737	0.0177174	CFAP70	cilia and flagella associated protein 70	118491
ENSG00000159251	11.6	0.72	0.32991	2.18853	0.028631	0.0778398	ACTC1	actin alpha cardiac muscle 1	70
ENSG00000271344	9.78	0.72	0.243464	2.94398	0.00324022	0.0143452	NA	NA	NA
ENSG00000231924	6.15	0.72	0.334668	2.16226	0.0305982	0.0817923	PSG1	pregnancy specific beta-1-glycoprotein 1	5669
ENSG00000135253	4.2	0.72	0.305208	2.35679	0.0184336	0.0556215	KCP	kielin cysteine rich BMP regulator	375616
ENSG00000233581	3.18	0.72	0.347421	2.09178	0.0364578	0.0935446	NA	NA	NA
ENSG00000179761	2.98	0.72	0.317201	2.24724	0.0246248	0.0694894	PIPOX	pipecolic acid and sarcosine oxidase	51268
ENSG00000248724	2.67	0.72	0.316185	2.25814	0.0239367	0.0680261	NPHP3-AS1	NPHP3 antisense RNA 1	348808
ENSG00000234699	2.57	0.72	0.315816	2.26673	0.0234065	0.0668451	NA	NA	NA
ENSG00000258048	1.62	0.72	0.334813	2.10779	0.0350488	0.0906537	NA	NA	NA
ENSG00000113248	1.48	0.72	0.343882	2.09152	0.0364816	0.0935817	PCDHB15	protocadherin beta 15	56121
ENSG00000250508	1.13	0.72	0.346843	2.03915	0.041435	0.103434	LINC02701	long intergenic non-protein coding RNA 2701	105369364
ENSG00000164120	0.84	0.72	0.315107	0.000811697	0.999352	0.999577	HPGD	15-hydroxyprostaglandin dehydrogenase	3248
ENSG00000232274	0.74	0.72	0.323542	2.18534	0.0288638	0.0782406	NA	NA	NA
ENSG00000226644	0.72	0.72	0.339505	2.11934	0.034062	0.0887696	NA	NA	NA
ENSG00000262801	0.64	0.72	0.295259	2.28029	0.0225905	NA	NA	NA	NA
ENSG00000172752	0.58	0.72	0.313244	2.2113	0.0270152	NA	COL6A5	collagen type VI alpha 5 chain	256076
ENSG00000243179	0.55	0.72	0.331367	2.14486	0.0319643	NA	NA	NA	NA
ENSG00000169313	0.46	0.72	0.331778	2.16613	0.0303014	NA	P2RY12	purinergic receptor P2Y12	64805
ENSG00000135919	28942.3	0.71	0.220027	3.22855	0.0012442	0.00683474	SERPINE2	serpin family E member 2	5270
ENSG00000131018	1988.95	0.71	0.185809	3.80682	0.000140765	0.00128632	SYNE1	spectrin repeat containing nuclear envelope protein 1	23345
ENSG00000082397	1410.43	0.71	0.320561	2.22606	0.0260099	0.0724738	EPB41L3	erythrocyte membrane protein band 4.1 like 3	23136
ENSG00000163386	876.95	0.71	0.138714	5.12888	2.91e-07	1.01e-05	NA	NA	NA
ENSG00000137414	873.79	0.71	0.127688	5.58211	2.38e-08	1.25e-06	FAM8A1	family with sequence similarity 8 member A1	51439
ENSG00000136867	348.7	0.71	0.158469	4.49105	7.09e-06	0.000128194	SLC31A2	solute carrier family 31 member 2	1318
ENSG00000072195	167.72	0.71	0.255034	2.78518	0.00534985	0.0212778	SPEG	striated muscle enriched protein kinase	10290
ENSG00000105464	139.33	0.71	0.259566	2.73641	0.00621136	0.0239331	GRIN2D	glutamate ionotropic receptor NMDA type subunit 2D	2906
ENSG00000167995	133.17	0.71	0.171947	4.1241	3.72e-05	0.00045996	BEST1	bestrophin 1	7439
ENSG00000005882	121.1	0.71	0.171552	4.16567	3.1e-05	0.000398744	PDK2	pyruvate dehydrogenase kinase 2	5164
ENSG00000167107	107.67	0.71	0.192029	3.67934	0.000233838	0.00188618	ACSF2	acyl-CoA synthetase family member 2	80221
ENSG00000163737	83.94	0.71	0.329287	2.16235	0.0305911	0.0817923	PF4	platelet factor 4	5196
ENSG00000128284	62.37	0.71	0.302055	2.34653	0.0189491	0.0568562	APOL3	apolipoprotein L3	80833
ENSG00000258484	62.25	0.71	0.295007	2.41154	0.0158855	0.0495158	SPESP1	sperm equatorial segment protein 1	246777
ENSG00000158555	54.39	0.71	0.136463	5.23134	1.68e-07	6.38e-06	GDPD5	glycerophosphodiester phosphodiesterase domain containing 5	81544
ENSG00000110876	39.76	0.71	0.239281	2.94814	0.00319688	0.0141892	SELPLG	selectin P ligand	6404
ENSG00000269554	25.93	0.71	0.27486	2.56938	0.010188	0.0351668	NA	NA	NA
ENSG00000160844	21.36	0.71	0.213	3.30951	0.000934583	0.00545452	NA	NA	NA
ENSG00000115556	20.15	0.71	0.299036	2.36572	0.0179948	0.0546485	PLCD4	phospholipase C delta 4	84812
ENSG00000106538	13.61	0.71	0.33705	2.18374	0.0289816	0.0784828	RARRES2	retinoic acid receptor responder 2	5919
ENSG00000185633	12.33	0.71	0.316703	2.24024	0.0250757	0.0704651	NDUFA4L2	NDUFA4 mitochondrial complex associated like 2	56901
ENSG00000110436	12.04	0.71	0.293002	2.41162	0.0158819	0.0495128	SLC1A2	solute carrier family 1 member 2	6506
ENSG00000232807	9.8	0.71	0.273264	2.59691	0.00940668	0.0330806	NA	NA	NA
ENSG00000156049	8.7	0.71	0.303552	2.34174	0.0191941	0.0573855	GNA14	G protein subunit alpha 14	9630
ENSG00000186056	7.4	0.71	0.266364	2.64051	0.00827816	0.0300448	MATN1-AS1	MATN1 antisense RNA 1	100129196
ENSG00000178015	7.1	0.71	0.295707	2.39294	0.0167138	0.0515636	GPR150	G protein-coupled receptor 150	285601
ENSG00000236423	5.16	0.71	0.265291	2.6776	0.00741514	0.0275129	LINC01134	long intergenic non-protein coding RNA 1134	100133612
ENSG00000213996	3.53	0.71	0.318439	2.2279	0.0258869	0.0721939	TM6SF2	transmembrane 6 superfamily member 2	53345
ENSG00000255182	2.66	0.71	0.323022	2.19235	0.0283542	0.0772835	NA	NA	NA
ENSG00000215483	2.3	0.71	0.335718	2.10895	0.0349487	0.0904318	LINC00548	long intergenic non-protein coding RNA 548	400123
ENSG00000260894	1.59	0.71	0.342513	2.04546	0.0408094	0.102217	NA	NA	NA
ENSG00000178562	1.39	0.71	0.339031	2.05876	0.0395176	0.0996427	CD28	CD28 molecule	940
ENSG00000108798	1.23	0.71	0.342681	2.05516	0.0398632	0.10034	ABI3	ABI family member 3	51225
ENSG00000224228	1.19	0.71	0.34572	2.02572	0.0427931	0.106095	NA	NA	NA
ENSG00000179776	1.06	0.71	0.321234	2.32037	0.0203207	0.0600636	CDH5	cadherin 5	1003
ENSG00000129450	0.86	0.71	0.283807	2.41903	0.0155621	0.0487207	SIGLEC9	sialic acid binding Ig like lectin 9	27180
ENSG00000228661	0.62	0.71	0.33409	2.09277	0.0363699	NA	STIM1-AS1	STIM1 antisense RNA 1	105376527
ENSG00000101405	0.5	0.71	0.32474	2.16289	0.0305497	NA	OXT	oxytocin/neurophysin I prepropeptide	5020
ENSG00000108821	153517	0.7	0.178572	3.90571	9.4e-05	0.000940873	COL1A1	collagen type I alpha 1 chain	1277
ENSG00000113140	39913.3	0.7	0.146333	4.76326	1.9e-06	4.55e-05	SPARC	secreted protein acidic and cysteine rich	6678
ENSG00000122786	14278.9	0.7	0.147535	4.72261	2.33e-06	5.33e-05	CALD1	caldesmon 1	800
ENSG00000172037	3829.26	0.7	0.127233	5.49524	3.9e-08	1.9e-06	LAMB2	laminin subunit beta 2	3913
ENSG00000136156	2727.01	0.7	0.143364	4.89122	1e-06	2.73e-05	ITM2B	integral membrane protein 2B	9445
ENSG00000134668	1928.46	0.7	0.168126	4.13753	3.51e-05	0.000440642	SPOCD1	SPOC domain containing 1	90853
ENSG00000150593	729.41	0.7	0.153683	4.5723	4.82e-06	9.43e-05	PDCD4	programmed cell death 4	27250
ENSG00000071575	595.59	0.7	0.182891	3.83693	0.000124582	0.00116839	TRIB2	tribbles pseudokinase 2	28951
ENSG00000151229	505.38	0.7	0.140149	5.00533	5.58e-07	1.71e-05	SLC2A13	solute carrier family 2 member 13	114134
ENSG00000048471	493.36	0.7	0.115534	6.06769	1.3e-09	1.13e-07	SNX29	sorting nexin 29	92017
ENSG00000100968	471.67	0.7	0.226016	3.0861	0.00202798	0.00997105	NFATC4	nuclear factor of activated T cells 4	4776
ENSG00000100284	452.63	0.7	0.128539	5.44401	5.21e-08	2.42e-06	TOM1	target of myb1 membrane trafficking protein	10043
ENSG00000153246	269.62	0.7	0.211873	3.32052	0.000898511	0.0052905	PLA2R1	phospholipase A2 receptor 1	22925
ENSG00000100842	185.35	0.7	0.253055	2.77781	0.00547262	0.0216677	EFS	embryonal Fyn-associated substrate	10278
ENSG00000237515	107.06	0.7	0.347313	2.03715	0.0416348	0.103879	SHISA9	shisa family member 9	729993
ENSG00000204291	103.82	0.7	0.34673	2.05319	0.0400542	0.100693	COL15A1	collagen type XV alpha 1 chain	1306
ENSG00000162105	55.06	0.7	0.306168	2.29681	0.0216297	0.0630327	SHANK2	SH3 and multiple ankyrin repeat domains 2	22941
ENSG00000176842	50.23	0.7	0.268797	2.60344	0.00922922	0.0325736	IRX5	iroquois homeobox 5	10265
ENSG00000258655	29.78	0.7	0.192716	3.64242	0.000270092	0.00210455	NA	NA	NA
ENSG00000223477	28.83	0.7	0.30337	2.31848	0.0204232	0.0602926	NA	NA	NA
ENSG00000146859	24.7	0.7	0.254077	2.74565	0.00603912	0.0234194	TMEM140	transmembrane protein 140	55281
ENSG00000160325	15.13	0.7	0.228833	3.04096	0.00235827	0.0112225	CACFD1	calcium channel flower domain containing 1	11094
ENSG00000140323	12.98	0.7	0.295184	2.36109	0.0182215	0.0551866	DISP2	dispatched RND transporter family member 2	85455
ENSG00000176734	10.64	0.7	0.321658	2.17212	0.0298466	0.0802914	NA	NA	NA
ENSG00000179772	9.12	0.7	0.278308	4.47205	7.75e-06	0.000136474	FOXS1	forkhead box S1	2307
ENSG00000143036	8.91	0.7	0.26946	2.58734	0.00967198	0.0338098	SLC44A3	solute carrier family 44 member 3	126969
ENSG00000196358	8.4	0.7	0.278012	2.50719	0.0121694	0.040156	NTNG2	netrin G2	84628
ENSG00000115138	7.15	0.7	0.337699	2.07257	0.0382125	0.0971278	POMC	proopiomelanocortin	5443
ENSG00000232907	6.11	0.7	0.235033	2.9781	0.0029004	0.0131801	DLGAP4-AS1	DLGAP4 antisense RNA 1	101926987
ENSG00000179428	5.99	0.7	0.318116	2.19089	0.0284597	0.0774506	IL6-AS1	IL6 antisense RNA 1	541472
ENSG00000254295	5.77	0.7	0.266527	2.62789	0.0085916	0.0308624	NA	NA	NA
ENSG00000124731	4.62	0.7	0.322477	3.95649	7.61e-05	0.000798055	TREM1	triggering receptor expressed on myeloid cells 1	54210
ENSG00000231768	2.97	0.7	0.329458	2.10557	0.0352419	0.0909947	LINC01354	long intergenic non-protein coding RNA 1354	100506795
ENSG00000267711	2.65	0.7	0.314275	2.19811	0.0279411	0.0764234	NA	NA	NA
ENSG00000181085	2.55	0.7	0.324641	2.13044	0.0331349	0.0870368	MAPK15	mitogen-activated protein kinase 15	225689
ENSG00000256564	2.49	0.7	0.331943	2.109	0.034945	0.0904318	NA	NA	NA
ENSG00000131400	2.34	0.7	0.316017	2.17785	0.0294171	0.079405	NAPSA	napsin A aspartic peptidase	9476
ENSG00000155897	1.96	0.7	0.332124	2.18538	0.0288607	0.0782406	ADCY8	adenylate cyclase 8	114
ENSG00000244558	1.6	0.7	0.347338	2.0024	0.0452412	0.110838	NA	NA	NA
ENSG00000101115	1.46	0.7	0.347275	2.00197	0.0452882	0.110911	SALL4	spalt like transcription factor 4	57167
ENSG00000100985	1.38	0.7	0.315881	1.10721	0.268203	0.421	MMP9	matrix metallopeptidase 9	4318
ENSG00000270210	1.27	0.7	0.347232	2.01174	0.0442476	0.108888	NA	NA	NA
ENSG00000257252	1.24	0.7	0.347449	1.98931	0.0466674	0.113437	NA	NA	NA
ENSG00000182687	1.17	0.7	0.345472	1.99765	0.0457551	0.111812	GALR2	galanin receptor 2	8811
ENSG00000265222	0.75	0.7	0.336709	2.10931	0.0349175	0.0904117	NA	NA	NA
ENSG00000236318	0.64	0.7	0.331147	2.09108	0.0365212	NA	NA	NA	NA
ENSG00000234156	0.47	0.7	0.324734	2.10518	0.0352759	NA	NA	NA	NA
ENSG00000173559	3956.45	0.69	0.106779	6.49902	8.08e-11	1.1e-08	NABP1	nucleic acid binding protein 1	64859
ENSG00000117139	2300.7	0.69	0.110161	6.25405	4e-10	4.21e-08	KDM5B	lysine demethylase 5B	10765
ENSG00000030582	1091.87	0.69	0.116336	5.92471	3.13e-09	2.36e-07	GRN	granulin precursor	2896
ENSG00000013016	685.64	0.69	0.148639	4.66827	3.04e-06	6.58e-05	EHD3	EH domain containing 3	30845
ENSG00000100154	550.66	0.69	0.169441	4.08869	4.34e-05	0.000521065	TTC28	tetratricopeptide repeat domain 28	23331
ENSG00000141574	266.85	0.69	0.210604	3.26771	0.00108423	0.00613545	SECTM1	secreted and transmembrane 1	6398
ENSG00000168890	130.24	0.69	0.124619	5.5217	3.36e-08	1.66e-06	TMEM150A	transmembrane protein 150A	129303
ENSG00000198753	95.19	0.69	0.195036	3.51541	0.000439075	0.00306525	PLXNB3	plexin B3	5365
ENSG00000137691	73.8	0.69	0.130427	5.27666	1.32e-07	5.18e-06	CFAP300	cilia and flagella associated protein 300	85016
ENSG00000264067	72.84	0.69	0.321405	2.15606	0.0310792	0.0828119	NA	NA	NA
ENSG00000166206	36.12	0.69	0.327482	2.12618	0.0334884	0.0876505	GABRB3	gamma-aminobutyric acid type A receptor subunit beta3	2562
ENSG00000173227	18.93	0.69	0.323962	2.12592	0.0335097	0.0876626	SYT12	synaptotagmin 12	91683
ENSG00000133433	13.1	0.69	0.302443	2.26357	0.0236008	0.0672474	GSTT2B	glutathione S-transferase theta 2B	653689
ENSG00000187950	12.21	0.69	0.25154	2.74287	0.0060905	0.0235806	OVCH1	ovochymase 1	341350
ENSG00000233554	11.98	0.69	0.226727	3.02611	0.00247718	0.0116787	NA	NA	NA
ENSG00000125966	10.34	0.69	0.238944	2.86639	0.00415179	0.0174615	MMP24	matrix metallopeptidase 24	10893
ENSG00000088538	8.47	0.69	0.257055	2.66268	0.00775217	0.028512	DOCK3	dedicator of cytokinesis 3	1795
ENSG00000259605	7.02	0.69	0.255158	2.69785	0.00697885	0.0262443	NA	NA	NA
ENSG00000197054	5.41	0.69	0.290993	2.37221	0.0176818	0.0539022	ZNF763	zinc finger protein 763	284390
ENSG00000181652	4.6	0.69	0.326186	2.12119	0.0339055	0.0884696	ATG9B	autophagy related 9B	285973
ENSG00000230176	4.44	0.69	0.318058	2.16716	0.030223	0.0810668	LINC01433	long intergenic non-protein coding RNA 1433	728228
ENSG00000254402	3.76	0.69	0.282078	2.41669	0.0156621	0.0489146	LRRC24	leucine rich repeat containing 24	441381
ENSG00000135324	3.14	0.69	0.346639	2.01062	0.044366	0.109152	MRAP2	melanocortin 2 receptor accessory protein 2	112609
ENSG00000238005	2.89	0.69	0.30123	2.27907	0.0226632	0.0652443	LOC101927851	uncharacterized LOC101927851	101927851
ENSG00000236094	2.49	0.69	0.342836	2.01677	0.043719	0.107846	LINC00545	long intergenic non-protein coding RNA 545	440132
ENSG00000224397	2.43	0.69	0.321601	2.1159	0.0343531	0.089371	PELATON	plaque enriched lncRNA in atherosclerotic and inflammatory bowel macrophage regulation	100506115
ENSG00000169783	2.38	0.69	0.336067	2.0293	0.0424279	0.105407	LINGO1	leucine rich repeat and Ig domain containing 1	84894
ENSG00000163762	2.32	0.69	0.330245	2.06833	0.0386089	0.0978593	TM4SF18	transmembrane 4 L six family member 18	116441
ENSG00000198156	1.88	0.69	0.329372	2.05775	0.0396138	0.099846	NPIPB6	nuclear pore complex interacting protein family member B6	728741
ENSG00000254035	1.55	0.69	0.346044	1.99299	0.0462622	0.11268	NA	NA	NA
ENSG00000232814	1.52	0.69	0.344156	1.97194	0.0486162	0.116832	COL4A2-AS1	COL4A2 antisense RNA 1	100874203
ENSG00000231083	1.4	0.69	0.324137	2.2734	0.0230021	0.0659847	NA	NA	NA
ENSG00000137142	1.23	0.69	0.331252	2.18523	0.0288722	0.0782525	IGFBPL1	insulin like growth factor binding protein like 1	347252
ENSG00000203907	1.15	0.69	0.345136	1.97396	0.0483862	0.116468	OOEP	oocyte expressed protein	441161
ENSG00000272823	0.97	0.69	0.347217	1.96917	0.048933	0.11749	NA	NA	NA
ENSG00000148357	0.8	0.69	0.331521	2.11333	0.0345727	0.0898208	HMCN2	hemicentin 2	256158
ENSG00000273389	0.76	0.69	0.344436	2.03172	0.0421816	0.104944	NA	NA	NA
ENSG00000204952	0.74	0.69	0.334731	2.07889	0.0376278	0.0959203	FBXO47	F-box protein 47	494188
ENSG00000183260	0.73	0.69	0.335135	2.06156	0.0392501	0.0991076	ABHD16B	abhydrolase domain containing 16B	140701
ENSG00000253455	0.66	0.69	0.316369	2.12664	0.0334498	NA	LOC101929217	uncharacterized LOC101929217	101929217
ENSG00000260209	0.57	0.69	0.335268	2.02468	0.0429003	NA	NA	NA	NA
ENSG00000181577	0.52	0.69	0.315832	2.11028	0.034834	NA	C6orf223	chromosome 6 open reading frame 223	221416
ENSG00000134013	7120.59	0.68	0.135075	5.06762	4.03e-07	1.31e-05	LOXL2	lysyl oxidase like 2	4017
ENSG00000100196	2995.13	0.68	0.146666	4.64231	3.45e-06	7.2e-05	KDELR3	KDEL endoplasmic reticulum protein retention receptor 3	11015
ENSG00000109089	665.47	0.68	0.148747	4.56404	5.02e-06	9.77e-05	CDR2L	cerebellar degeneration related protein 2 like	30850
ENSG00000211448	535.37	0.68	0.331516	2.06081	0.0393212	0.0992126	DIO2	iodothyronine deiodinase 2	1734
ENSG00000154511	487.61	0.68	0.146615	4.63047	3.65e-06	7.53e-05	DIPK1A	divergent protein kinase domain 1A	388650
ENSG00000005243	466.51	0.68	0.165932	4.08848	4.34e-05	0.000521211	COPZ2	COPI coat complex subunit zeta 2	51226
ENSG00000165655	382.51	0.68	0.15351	4.44909	8.62e-06	0.000148492	ZNF503	zinc finger protein 503	84858
ENSG00000100439	331.7	0.68	0.191135	3.54844	0.000387522	0.00279242	ABHD4	abhydrolase domain containing 4, N-acyl phospholipase B	63874
ENSG00000196562	239.54	0.68	0.28981	2.34699	0.0189256	0.0567946	SULF2	sulfatase 2	55959
ENSG00000115226	142.67	0.68	0.171959	3.96118	7.46e-05	0.000785542	FNDC4	fibronectin type III domain containing 4	64838
ENSG00000121552	85.86	0.68	0.27425	2.46907	0.0135466	0.0436498	CSTA	cystatin A	1475
ENSG00000115252	75.51	0.68	0.318233	2.12914	0.0332431	0.0872019	PDE1A	phosphodiesterase 1A	5136
ENSG00000168306	68.69	0.68	0.232707	2.92904	0.00340007	0.0149089	ACOX2	acyl-CoA oxidase 2	8309
ENSG00000205085	30.83	0.68	0.188147	3.59036	0.000330215	0.00245576	FAM71F2	family with sequence similarity 71 member F2	346653
ENSG00000132854	27.41	0.68	0.347447	1.96725	0.0491538	0.117932	KANK4	KN motif and ankyrin repeat domains 4	163782
ENSG00000173114	24.08	0.68	0.322941	2.12045	0.0339684	0.0885856	LRRN3	leucine rich repeat neuronal 3	54674
ENSG00000160145	17.89	0.68	0.188247	3.63211	0.000281114	0.00217024	KALRN	kalirin RhoGEF kinase	8997
ENSG00000221949	17.69	0.68	0.235249	2.87013	0.00410305	0.0173094	LINC01465	long intergenic non-protein coding RNA 1465	283416
ENSG00000232082	14.67	0.68	0.203923	3.31621	0.000912472	0.00535469	RPS6KA2-IT1	RPS6KA2 intronic transcript 1	100874353
ENSG00000223414	11.02	0.68	0.329588	2.06014	0.0393847	0.0993337	NA	NA	NA
ENSG00000269954	10.69	0.68	0.347017	1.9608	0.0499029	0.119322	NA	NA	NA
ENSG00000154263	10.15	0.68	0.264981	2.55803	0.0105266	0.0360574	ABCA10	ATP binding cassette subfamily A member 10	10349
ENSG00000179046	9.97	0.68	0.346892	1.98198	0.0474817	0.114865	TRIML2	tripartite motif family like 2	205860
ENSG00000155926	9.93	0.68	0.263121	2.58781	0.00965888	0.0338008	SLA	Src like adaptor	6503
ENSG00000087076	8.92	0.68	0.282018	2.40795	0.0160424	0.0498838	HSD17B14	hydroxysteroid 17-beta dehydrogenase 14	51171
ENSG00000248975	6.75	0.68	0.325496	2.07553	0.0379378	0.0965699	NA	NA	NA
ENSG00000169306	5.99	0.68	0.281913	-0.249734	0.802793	0.882852	IL1RAPL1	interleukin 1 receptor accessory protein like 1	11141
ENSG00000158113	5.97	0.68	0.287701	2.34279	0.0191401	0.0572687	LRRC43	leucine rich repeat containing 43	254050
ENSG00000170909	5.87	0.68	0.297872	2.29149	0.0219349	0.0636621	OSCAR	osteoclast associated Ig-like receptor	126014
ENSG00000249700	5.51	0.68	0.261742	2.57012	0.0101663	0.0351168	SRD5A3-AS1	SRD5A3 antisense RNA 1	100506462
ENSG00000265413	5.13	0.68	0.264251	2.55917	0.0104922	0.0359589	NA	NA	NA
ENSG00000133321	4.58	0.68	0.340525	2.00368	0.045104	0.110586	PLAAT4	phospholipase A and acyltransferase 4	5920
ENSG00000125510	4.02	0.68	0.312574	2.15582	0.031098	0.0828505	OPRL1	opioid related nociceptin receptor 1	4987
ENSG00000064205	2.86	0.68	0.334607	2.11497	0.0344321	0.0895161	CCN5	cellular communication network factor 5	8839
ENSG00000261550	2.82	0.68	0.309819	2.16518	0.0303738	0.0813828	NA	NA	NA
ENSG00000271858	2.34	0.68	0.306747	2.17928	0.0293108	0.0791959	CYB561D2	cytochrome b561 family member D2	11068
ENSG00000261567	2.33	0.68	0.324325	2.0708	0.0383773	0.0973926	NA	NA	NA
ENSG00000147234	2.14	0.68	0.347412	1.9579	0.0502416	0.119915	FRMPD3	FERM and PDZ domain containing 3	84443
ENSG00000261305	1.86	0.68	0.345686	1.95559	0.050513	0.120428	NA	NA	NA
ENSG00000229481	1.71	0.68	0.346559	1.93317	0.0532155	0.12555	NA	NA	NA
ENSG00000232034	1.48	0.68	0.339388	1.98022	0.0476787	0.115183	NA	NA	NA
ENSG00000004468	1.33	0.68	0.324137	2.21393	0.0268337	0.0741682	CD38	CD38 molecule	952
ENSG00000224821	1.07	0.68	0.347366	1.91372	0.0556559	0.130097	COL4A2-AS2	COL4A2 antisense RNA 2	100129836
ENSG00000181378	0.97	0.68	0.342348	2.04573	0.0407833	0.102178	CFAP65	cilia and flagella associated protein 65	255101
ENSG00000112936	0.86	0.68	0.290195	2.30121	0.0213799	0.0624277	C7	complement C7	730
ENSG00000165606	0.83	0.68	0.346749	1.97365	0.0484211	0.116508	DRGX	dorsal root ganglia homeobox	644168
ENSG00000272386	0.77	0.68	0.317391	2.1096	0.034893	0.0903605	NA	NA	NA
ENSG00000211714	0.75	0.68	0.306389	2.15493	0.0311671	0.0829773	TRBV7-3	T cell receptor beta variable 7-3	28595
ENSG00000128268	0.39	0.68	0.288047	1.192	0.23326	NA	MGAT3	beta-1,4-mannosyl-glycoprotein 4-beta-N-acetylglucosaminyltransferase	4248
ENSG00000245532	13737.1	0.67	0.204938	3.25972	0.00111523	0.00628403	NEAT1	nuclear paraspeckle assembly transcript 1	283131
ENSG00000138061	11209.5	0.67	0.206285	3.26766	0.00108439	0.00613545	CYP1B1	cytochrome P450 family 1 subfamily B member 1	1545
ENSG00000182220	2547.23	0.67	0.102573	6.50498	7.77e-11	1.08e-08	ATP6AP2	ATPase H+ transporting accessory protein 2	10159
ENSG00000008513	2049.59	0.67	0.151615	4.43586	9.17e-06	0.000156262	ST3GAL1	ST3 beta-galactoside alpha-2,3-sialyltransferase 1	6482
ENSG00000104765	1930.69	0.67	0.21261	3.13219	0.00173506	0.00882377	BNIP3L	BCL2 interacting protein 3 like	665
ENSG00000153071	1827.89	0.67	0.159632	4.1825	2.88e-05	0.000377123	DAB2	DAB adaptor protein 2	1601
ENSG00000197496	862.34	0.67	0.151707	4.43585	9.17e-06	0.000156262	SLC2A10	solute carrier family 2 member 10	81031
ENSG00000078804	388.05	0.67	0.178152	3.739	0.000184752	0.00157051	TP53INP2	tumor protein p53 inducible nuclear protein 2	58476
ENSG00000130813	270.92	0.67	0.174065	3.87682	0.00010583	0.00102912	SHFL	shiftless antiviral inhibitor of ribosomal frameshifting	55337
ENSG00000164920	62	0.67	0.2608	2.58123	0.00984483	0.0342833	OSR2	odd-skipped related transciption factor 2	116039
ENSG00000221994	43.27	0.67	0.215364	3.13161	0.00173851	0.00882735	ZNF630	zinc finger protein 630	57232
ENSG00000224596	41.14	0.67	0.247538	2.70812	0.00676651	0.0256003	ZMIZ1-AS1	ZMIZ1 antisense RNA 1	283050
ENSG00000136999	28.63	0.67	0.274232	0.329228	0.741983	0.840757	CCN3	cellular communication network factor 3	4856
ENSG00000144488	26.85	0.67	0.321932	2.07139	0.0383227	0.0973051	ESPNL	espin like	339768
ENSG00000134343	22.34	0.67	0.325964	2.05327	0.0400463	0.100686	ANO3	anoctamin 3	63982
ENSG00000138449	12.15	0.67	0.316248	2.11814	0.0341629	0.0889927	SLC40A1	solute carrier family 40 member 1	30061
ENSG00000146411	11.51	0.67	0.333368	2.00396	0.0450746	0.110542	SLC2A12	solute carrier family 2 member 12	154091
ENSG00000268049	6.31	0.67	0.295605	2.27674	0.0228016	0.0655258	NA	NA	NA
ENSG00000272369	5.4	0.67	0.261543	2.54486	0.0109322	0.0370033	NA	NA	NA
ENSG00000065325	5.31	0.67	0.330968	2.03626	0.0417242	0.104075	GLP2R	glucagon like peptide 2 receptor	9340
ENSG00000165731	4.41	0.67	0.31191	2.13967	0.0323815	0.0853957	RET	ret proto-oncogene	5979
ENSG00000231346	4.21	0.67	0.30951	2.17117	0.0299183	0.0804217	NA	NA	NA
ENSG00000176723	3.78	0.67	0.327447	2.03822	0.0415284	0.103641	ZNF843	zinc finger protein 843	283933
ENSG00000104967	2.27	0.67	0.339722	1.96414	0.0495139	0.118663	NOVA2	NOVA alternative splicing regulator 2	4858
ENSG00000259915	2.14	0.67	0.323373	2.03548	0.0418023	0.104219	NA	NA	NA
ENSG00000254333	1.87	0.67	0.331669	1.98371	0.0472883	0.114612	NDST1-AS1	NDST1 antisense RNA 1	102546298
ENSG00000272582	1.82	0.67	0.331906	1.98357	0.0473035	0.114621	NA	NA	NA
ENSG00000236051	1.75	0.67	0.33205	1.993	0.0462612	0.11268	MYCBP2-AS1	MYCBP2 antisense RNA 1	100874212
ENSG00000268081	1.69	0.67	0.345798	1.94599	0.0516561	0.122622	NA	NA	NA
ENSG00000140527	1.39	0.67	0.347094	1.92566	0.054147	0.127279	WDR93	WD repeat domain 93	56964
ENSG00000064886	1.09	0.67	0.346542	1.90697	0.0565241	0.131662	CHI3L2	chitinase 3 like 2	1117
ENSG00000130201	1.01	0.67	0.297205	2.34383	0.0190868	0.0571714	NA	NA	NA
ENSG00000141753	32846.4	0.66	0.124729	5.27635	1.32e-07	5.18e-06	IGFBP4	insulin like growth factor binding protein 4	3487
ENSG00000091136	14152.2	0.66	0.116045	5.67922	1.35e-08	7.93e-07	LAMB1	laminin subunit beta 1	3912
ENSG00000035862	10642.3	0.66	0.130511	5.07688	3.84e-07	1.26e-05	TIMP2	TIMP metallopeptidase inhibitor 2	7077
ENSG00000117152	3393.48	0.66	0.273096	2.40717	0.0160766	0.0499739	RGS4	regulator of G protein signaling 4	5999
ENSG00000162616	2839.84	0.66	0.169561	3.86516	0.000111016	0.00106875	DNAJB4	DnaJ heat shock protein family (Hsp40) member B4	11080
ENSG00000129353	1233.47	0.66	0.180567	3.6431	0.000269377	0.00210069	SLC44A2	solute carrier family 44 member 2	57153
ENSG00000051523	633.34	0.66	0.105777	6.21226	5.22e-10	5.18e-08	CYBA	cytochrome b-245 alpha chain	1535
ENSG00000088826	624.65	0.66	0.210348	3.13755	0.00170367	0.00871027	SMOX	spermine oxidase	54498
ENSG00000139318	608.56	0.66	0.179109	3.70231	0.000213648	0.00175419	DUSP6	dual specificity phosphatase 6	1848
ENSG00000213240	525.98	0.66	0.156555	4.24708	2.17e-05	0.000301518	NA	NA	NA
ENSG00000099337	221.7	0.66	0.228093	2.88067	0.00396836	0.0168818	KCNK6	potassium two pore domain channel subfamily K member 6	9424
ENSG00000170345	212.17	0.66	0.279291	2.35257	0.018644	0.0561156	FOS	Fos proto-oncogene, AP-1 transcription factor subunit	2353
ENSG00000089639	211.64	0.66	0.102838	6.41075	1.45e-10	1.79e-08	GMIP	GEM interacting protein	51291
ENSG00000150967	162.31	0.66	0.116663	5.67631	1.38e-08	8.01e-07	ABCB9	ATP binding cassette subfamily B member 9	23457
ENSG00000137752	113.37	0.66	0.24278	2.7105	0.0067181	0.0254648	CASP1	caspase 1	834
ENSG00000179059	87.84	0.66	0.325449	2.02164	0.0432135	0.106904	ZFP42	ZFP42 zinc finger protein	132625
ENSG00000163694	56.53	0.66	0.235654	2.79449	0.0051981	0.0208205	RBM47	RNA binding motif protein 47	54502
ENSG00000228486	31.25	0.66	0.189539	3.46917	0.000522072	0.00349393	C2orf92	chromosome 2 open reading frame 92	728537
ENSG00000178852	24.11	0.66	0.263854	2.51531	0.0118928	0.0394459	EFCAB13	EF-hand calcium binding domain 13	124989
ENSG00000160323	23.87	0.66	0.254421	2.57808	0.00993516	0.0344732	ADAMTS13	ADAM metallopeptidase with thrombospondin type 1 motif 13	11093
ENSG00000158220	19.8	0.66	0.223355	2.95948	0.00308155	0.0137854	ESYT3	extended synaptotagmin 3	83850
ENSG00000236682	18.56	0.66	0.260744	2.52843	0.0114574	0.0383186	MAP3K2-DT	MAP3K2 divergent transcript	100506922
ENSG00000185585	16.82	0.66	0.343768	1.93918	0.052479	0.124269	OLFML2A	olfactomedin like 2A	169611
ENSG00000130649	13.15	0.66	0.244922	2.69808	0.00697413	0.0262355	CYP2E1	cytochrome P450 family 2 subfamily E member 1	1571
ENSG00000248371	11.77	0.66	0.264556	2.48233	0.0130527	0.0423735	LINC02056	long intergenic non-protein coding RNA 2056	102477328
ENSG00000164638	11.54	0.66	0.213356	3.08152	0.00205945	0.0101084	SLC29A4	solute carrier family 29 member 4	222962
ENSG00000116039	9.47	0.66	0.261782	2.50709	0.012173	0.0401611	ATP6V1B1	ATPase H+ transporting V1 subunit B1	525
ENSG00000111046	7.4	0.66	0.330121	1.9945	0.0460976	0.112384	MYF6	myogenic factor 6	4618
ENSG00000257242	6.17	0.66	0.281018	2.35027	0.0187598	0.0563845	LINC01619	long intergenic non-protein coding RNA 1619	256021
ENSG00000182771	4.17	0.66	0.347385	1.93497	0.0529941	0.125212	GRID1	glutamate ionotropic receptor delta type subunit 1	2894
ENSG00000169548	4.15	0.66	0.345179	1.91044	0.0560768	0.130826	ZNF280A	zinc finger protein 280A	129025
ENSG00000180113	3.81	0.66	0.345289	1.92112	0.0547164	0.128383	TDRD6	tudor domain containing 6	221400
ENSG00000157782	2.36	0.66	0.343722	1.96056	0.0499301	0.119349	CABP1	calcium binding protein 1	9478
ENSG00000170054	1.78	0.66	0.276369	2.69091	0.00712564	0.0266609	SERPINA9	serpin family A member 9	327657
ENSG00000120324	1.75	0.66	0.343371	1.9289	0.0537438	0.126486	PCDHB10	protocadherin beta 10	56126
ENSG00000241111	1.7	0.66	0.343523	1.91343	0.055693	0.130151	PRICKLE2-AS1	PRICKLE2 antisense RNA 1	100652759
ENSG00000161958	1.31	0.66	0.347376	1.87897	0.0602481	0.138361	FGF11	fibroblast growth factor 11	2256
ENSG00000260672	1.24	0.66	0.341414	1.88418	0.0595405	0.137161	NA	NA	NA
ENSG00000187260	1.17	0.66	0.337958	1.96669	0.0492186	0.118053	WDR86	WD repeat domain 86	349136
ENSG00000162624	1.12	0.66	0.276118	2.52505	0.0115681	0.0386284	LHX8	LIM homeobox 8	431707
ENSG00000225969	1.11	0.66	0.346926	1.86048	0.0628178	0.142848	NA	NA	NA
ENSG00000175513	1.05	0.66	0.347462	1.86988	0.0615004	0.140599	TSGA10IP	testis specific 10 interacting protein	254187
ENSG00000255318	0.94	0.66	0.340165	1.95429	0.0506669	0.120705	NA	NA	NA
ENSG00000042781	0.9	0.66	0.347313	1.86081	0.0627714	0.142827	USH2A	usherin	7399
ENSG00000267009	0.89	0.66	0.322139	2.09719	0.035977	0.0924712	NA	NA	NA
ENSG00000129204	0.8	0.66	0.346413	1.89948	0.0575019	0.13339	USP6	ubiquitin specific peptidase 6	9098
ENSG00000204099	0.76	0.66	0.303817	2.115	0.0344296	0.0895161	NEU4	neuraminidase 4	129807
ENSG00000117009	0.69	0.66	0.344358	1.91121	0.0559779	0.13069	KMO	kynurenine 3-monooxygenase	8564
ENSG00000258666	0.6	0.66	0.342624	1.91668	0.0552787	NA	NA	NA	NA
ENSG00000225667	0.45	0.66	0.325285	2.01799	0.0435927	NA	NA	NA	NA
ENSG00000166147	51993.6	0.65	0.17527	3.73215	0.000189849	0.00160463	FBN1	fibrillin 1	2200
ENSG00000119900	4399.11	0.65	0.184902	3.51273	0.00044353	0.00308851	OGFRL1	opioid growth factor receptor like 1	79627
ENSG00000124151	2716.95	0.65	0.155616	4.14901	3.34e-05	0.000424099	NCOA3	nuclear receptor coactivator 3	8202
ENSG00000255112	1531	0.65	0.160168	4.05226	5.07e-05	0.00058378	CHMP1B	charged multivesicular body protein 1B	57132
ENSG00000181104	1344.74	0.65	0.252994	2.57727	0.00995855	0.0345481	F2R	coagulation factor II thrombin receptor	2149
ENSG00000084731	520.3	0.65	0.119007	5.46985	4.5e-08	2.16e-06	KIF3C	kinesin family member 3C	3797
ENSG00000173599	492.14	0.65	0.172326	3.78548	0.00015341	0.00136685	PC	pyruvate carboxylase	5091
ENSG00000046653	419.18	0.65	0.291927	2.22905	0.0258103	0.0720115	GPM6B	glycoprotein M6B	2824
ENSG00000183671	357.57	0.65	0.270676	2.40928	0.0159841	0.0497603	CMKLR2	chemerin chemokine-like receptor 2	2825
ENSG00000163071	266.52	0.65	0.149687	4.32498	1.53e-05	0.000230542	SPATA18	spermatogenesis associated 18	132671
ENSG00000188483	245.5	0.65	0.121366	5.36074	8.29e-08	3.52e-06	IER5L	immediate early response 5 like	389792
ENSG00000164039	188.55	0.65	0.111539	5.793	6.91e-09	4.59e-07	BDH2	3-hydroxybutyrate dehydrogenase 2	56898
ENSG00000223403	101.48	0.65	0.134703	4.84121	1.29e-06	3.39e-05	MEG9	maternally expressed 9	100507257
ENSG00000176293	87.9	0.65	0.239898	2.69778	0.00698035	0.0262448	ZNF135	zinc finger protein 135	7694
ENSG00000054392	69.58	0.65	0.2786	2.34385	0.0190858	0.0571714	HHAT	hedgehog acyltransferase	55733
ENSG00000159714	52.67	0.65	0.171342	3.77708	0.000158676	0.00140467	ZDHHC1	zinc finger DHHC-type containing 1	29800
ENSG00000164867	26.95	0.65	0.245351	2.6315	0.00850078	0.0306104	NOS3	nitric oxide synthase 3	4846
ENSG00000196381	21.53	0.65	0.219513	2.93952	0.00328717	0.0145263	ZNF781	zinc finger protein 781	163115
ENSG00000180730	19.54	0.65	0.343676	1.92963	0.053653	0.126324	SHISA2	shisa family member 2	387914
ENSG00000205639	10.78	0.65	0.231433	2.79375	0.00521005	0.0208554	MFSD2B	major facilitator superfamily domain containing 2B	388931
ENSG00000205403	6.2	0.65	0.329503	1.98277	0.0473931	0.114709	CFI	complement factor I	3426
ENSG00000254842	4.08	0.65	0.311233	2.07269	0.0382009	0.0971241	NA	NA	NA
ENSG00000107518	3.31	0.65	0.327395	1.987	0.0469219	0.113912	ATRNL1	attractin like 1	26033
ENSG00000232415	3.25	0.65	0.30966	2.07942	0.0375791	0.0958087	NA	NA	NA
ENSG00000178573	3.2	0.65	0.345596	1.8719	0.0612199	0.140091	MAF	MAF bZIP transcription factor	4094
ENSG00000267640	2.98	0.65	0.313947	2.05002	0.0403625	0.101335	NA	NA	NA
ENSG00000129244	2.95	0.65	0.3248	1.99593	0.0459419	0.112084	ATP1B2	ATPase Na+/K+ transporting subunit beta 2	482
ENSG00000224939	2.51	0.65	0.323729	1.98145	0.047541	0.114951	LINC00184	long intergenic non-protein coding RNA 184	100302691
ENSG00000265962	2.26	0.65	0.334456	1.9363	0.0528308	0.124911	GACAT2	gastric cancer associated transcript 2	100287082
ENSG00000160111	2.17	0.65	0.337839	1.90132	0.0572595	0.132956	CPAMD8	C3 and PZP like alpha-2-macroglobulin domain containing 8	27151
ENSG00000251361	1.9	0.65	0.336799	1.91663	0.0552851	0.129355	NA	NA	NA
ENSG00000259238	1.77	0.65	0.326126	1.95488	0.0505972	0.120599	NA	NA	NA
ENSG00000249096	1.24	0.65	0.347319	1.85785	0.0631901	0.143525	NA	NA	NA
ENSG00000258593	1.15	0.65	0.347248	1.84865	0.0645084	0.145712	NA	NA	NA
ENSG00000223838	1.13	0.65	0.34497	1.86724	0.0618686	0.141273	NA	NA	NA
ENSG00000108700	0.97	0.65	0.274971	2.3886	0.0169129	0.0520277	CCL8	C-C motif chemokine ligand 8	6355
ENSG00000188747	0.81	0.65	0.33748	1.96994	0.0488454	0.117309	NOXA1	NADPH oxidase activator 1	10811
ENSG00000224000	0.59	0.65	0.331463	1.92823	0.0538269	NA	NA	NA	NA
ENSG00000173517	3581.21	0.64	0.12912	4.91951	8.68e-07	2.44e-05	PEAK1	pseudopodium enriched atypical kinase 1	79834
ENSG00000109686	2301.86	0.64	0.157375	4.04183	5.3e-05	0.000603024	SH3D19	SH3 domain containing 19	152503
ENSG00000132170	461.84	0.64	0.294111	2.16228	0.0305965	0.0817923	PPARG	peroxisome proliferator activated receptor gamma	5468
ENSG00000175505	450.66	0.64	0.172063	3.70922	0.000207897	0.00172239	CLCF1	cardiotrophin like cytokine factor 1	23529
ENSG00000163710	279.68	0.64	0.232726	2.73368	0.00626317	0.0240701	PCOLCE2	procollagen C-endopeptidase enhancer 2	26577
ENSG00000163521	204.72	0.64	0.175122	3.65117	0.000261051	0.00205154	GLB1L	galactosidase beta 1 like	79411
ENSG00000120913	145.48	0.64	0.152588	4.19571	2.72e-05	0.000361209	PDLIM2	PDZ and LIM domain 2	64236
ENSG00000141376	141.65	0.64	0.15165	4.19571	2.72e-05	0.000361209	BCAS3	BCAS3 microtubule associated cell migration factor	54828
ENSG00000179909	137.24	0.64	0.168249	3.78816	0.00015177	0.00135675	ZNF154	zinc finger protein 154	7710
ENSG00000128602	102.46	0.64	0.18697	3.42026	0.00062562	0.00401523	SMO	smoothened, frizzled class receptor	6608
ENSG00000175938	39.21	0.64	0.231502	2.76089	0.0057645	0.0226094	ORAI3	ORAI calcium release-activated calcium modulator 3	93129
ENSG00000268913	37.62	0.64	0.236322	2.70683	0.00679292	0.0256805	NA	NA	NA
ENSG00000261578	36.39	0.64	0.197466	3.26205	0.00110608	0.00624274	NA	NA	NA
ENSG00000162946	36.14	0.64	0.246913	2.60693	0.00913576	0.0323002	DISC1	DISC1 scaffold protein	27185
ENSG00000105519	29.05	0.64	0.259825	2.46054	0.0138727	0.0444729	CAPS	calcyphosine	828
ENSG00000259807	27.39	0.64	0.259182	2.47711	0.0132453	0.0428881	NA	NA	NA
ENSG00000254837	24.54	0.64	0.169804	3.76899	0.000163909	0.00143703	LOC100287896	uncharacterized LOC100287896	100287896
ENSG00000170293	20.97	0.64	0.245638	2.60639	0.00915012	0.0323437	CMTM8	CKLF like MARVEL transmembrane domain containing 8	152189
ENSG00000250548	18.41	0.64	0.218493	2.93455	0.00334029	0.0147205	LINC01303	long intergenic non-protein coding RNA 1303	101927780
ENSG00000127533	7.31	0.64	0.34512	1.90516	0.0567586	0.132057	F2RL3	F2R like thrombin or trypsin receptor 3	9002
ENSG00000099840	6.52	0.64	0.245224	2.61541	0.00891199	0.0316996	IZUMO4	IZUMO family member 4	113177
ENSG00000105877	6.31	0.64	0.347214	1.8504	0.0642566	0.14533	DNAH11	dynein axonemal heavy chain 11	8701
ENSG00000151962	4.79	0.64	0.332372	1.91191	0.0558872	0.130557	RBM46	RNA binding motif protein 46	166863
ENSG00000232284	4.44	0.64	0.29147	2.17751	0.0294423	0.0794396	GNG12-AS1	GNG12, DIRAS3 and WLS antisense RNA 1	100289178
ENSG00000233308	4.41	0.64	0.317285	2.16592	0.0303172	0.081265	OSTN-AS1	OSTN antisense RNA 1	106480738
ENSG00000271043	4.03	0.64	0.2719	2.34851	0.0188484	0.0566159	NA	NA	NA
ENSG00000269235	3.39	0.64	0.321659	1.98939	0.0466577	0.113428	ZNF350-AS1	ZNF350 antisense RNA 1	101669766
ENSG00000223855	1.75	0.64	0.34744	1.84315	0.0653075	0.147163	PDGFA-DT	PDGFA divergent transcript	441307
ENSG00000182366	1.46	0.64	0.337592	1.93857	0.0525534	0.124386	FAM87A	family with sequence similarity 87 member A	157693
ENSG00000253658	1.26	0.64	0.313965	2.19711	0.0280125	0.0765908	LINC01592	long intergenic non-protein coding RNA 1592	100505718
ENSG00000168079	1.16	0.64	0.271802	2.1769	0.0294881	0.0795108	SCARA5	scavenger receptor class A member 5	286133
ENSG00000258424	1.16	0.64	0.347447	1.81802	0.0690611	0.153351	NA	NA	NA
ENSG00000234754	1.02	0.64	0.346979	1.80662	0.0708209	0.156518	LINC02817	long intergenic non-protein coding RNA 2817	400804
ENSG00000010030	1.01	0.64	0.347294	1.8067	0.0708091	0.15651	ETV7	ETS variant transcription factor 7	51513
ENSG00000198099	0.98	0.64	0.290891	2.2398	0.0251041	0.0705247	ADH4	alcohol dehydrogenase 4 (class II), pi polypeptide	127
ENSG00000250198	0.96	0.64	0.314744	2.09118	0.0365119	0.0936118	NA	NA	NA
ENSG00000237101	0.8	0.64	0.346103	1.84149	0.0655505	0.147543	LOC101927164	uncharacterized LOC101927164	101927164
ENSG00000238164	0.7	0.64	0.344579	1.86087	0.0627627	0.142824	NA	NA	NA
ENSG00000165685	0.67	0.64	0.305809	2.0157	0.0438316	NA	TMEM52B	transmembrane protein 52B	120939
ENSG00000232810	0.54	0.64	0.309506	2.02616	0.0427489	NA	TNF	tumor necrosis factor	7124
ENSG00000163430	30876.2	0.63	0.168873	3.73453	0.000188067	0.00159167	FSTL1	follistatin like 1	11167
ENSG00000197746	6116.89	0.63	0.134121	4.69226	2.7e-06	5.97e-05	PSAP	prosaposin	5660
ENSG00000164161	977.48	0.63	0.286373	2.21356	0.0268593	0.0742144	HHIP	hedgehog interacting protein	64399
ENSG00000197903	768.33	0.63	0.188491	3.35337	0.000798355	0.00484075	H2BC12	H2B clustered histone 12	85236
ENSG00000135503	573.06	0.63	0.120523	5.25854	1.45e-07	5.58e-06	ACVR1B	activin A receptor type 1B	91
ENSG00000198873	342.55	0.63	0.160654	3.90712	9.34e-05	0.000937169	GRK5	G protein-coupled receptor kinase 5	2869
ENSG00000124225	292	0.63	0.280636	2.22885	0.0258242	0.0720397	PMEPA1	prostate transmembrane protein, androgen induced 1	56937
ENSG00000122694	285.48	0.63	0.207197	3.01696	0.00255324	0.011935	GLIPR2	GLI pathogenesis related 2	152007
ENSG00000206190	248.84	0.63	0.334147	1.88233	0.0597908	0.137639	ATP10A	ATPase phospholipid transporting 10A (putative)	57194
ENSG00000185920	188.84	0.63	0.153369	4.07486	4.6e-05	0.000542537	PTCH1	patched 1	5727
ENSG00000008056	109.26	0.63	0.181386	3.48726	0.000487997	0.00331262	SYN1	synapsin I	6853
ENSG00000242732	101.05	0.63	0.217689	2.88589	0.00390309	0.0166482	RTL5	retrotransposon Gag like 5	340526
ENSG00000116675	82.26	0.63	0.250395	2.52334	0.0116245	0.0387766	DNAJC6	DnaJ heat shock protein family (Hsp40) member C6	9829
ENSG00000198892	70.83	0.63	0.187114	3.36882	0.00075491	0.00463637	SHISA4	shisa family member 4	149345
[truncated: 24,430 more rows]

## Sheet: Differentiation medias
Molecule	Source	Product #	Final [ ]
Dexamethasone	Sigma-Aldrich	D1756	100nM	Adipogenic
1-methyl-3-isobutylxanthine	Sigma-Aldrich	I5879	450nM
Rosiglitazone	Cayman	71740	1µM
Insulin	Sigma-Aldrich	I5500	1µg/ml
β-glycerophosphate	Sigma-Aldrich	G9422	5mM	Osteogenic
L-ascorbic acid	Sigma-Aldrich	A92902	283µM
Dexamethasone	Sigma-Aldrich	D1756	10nM
1α,25-dihydroxyvitamin D3	Sigma-Aldrich	D1530	10µM

## Sheet: Macrophage polarization factors
Molecule	Source	Product #	Final [ ] (ng/ml)
GMCSF	Biolegend	572903	20
IFNg	Biolegend	570202	20
IL6	Biolegend	570804	20
LPS	Sigma-Aldrich	L3012	20
MCSF	Biolegend	574804	20
IL4	Biolegend	574002	20
IL13	Biolegend	571102	20
